# Supplementary material for: Ge(ii) cation catalyzed hydroboration of aldehydes and ketones
Source: Royal Society of Chemistry journal article supplement (doi:10.1039/c8dt05121f), 2019-01-01
Supplement: c8dt05121f1.pdf [file c8dt05121f1.pdf]

# **Ge(II) cation catalyzed hydroboration of aldehydes and ketones**

*Soumen Sinhababu<sup>#</sup>, Dharmendra Singh<sup>#</sup>, Mahendra Kumar Sharma, Rahul Kumar Siwatch, Pritam  
mahawar and Selvarajan Nagendran\**

Department of Chemistry, Indian Institute of Technology Delhi, Hauz Khas, New Delhi 110 016, India

## Contents

|                  |                                                                                                                                                           | Page No.     |
|------------------|-----------------------------------------------------------------------------------------------------------------------------------------------------------|--------------|
|                  | <b>Experimental section</b>                                                                                                                               | <b>3-5</b>   |
|                  | <b>NMR spectra of compounds 3-7</b>                                                                                                                       | <b>6-17</b>  |
|                  | <b>Computational details</b>                                                                                                                              | <b>18</b>    |
| <b>Figure S4</b> | <b>Optimized structure of compound 4</b>                                                                                                                  | <b>19</b>    |
|                  | <b>Coordinates for the optimized geometry of compound 4</b>                                                                                               | <b>20-22</b> |
|                  | <b>X-ray crystal structure determination of compounds 4-7 and 11</b>                                                                                      | <b>23</b>    |
| <b>Table S1</b>  | <b>Crystal data and structure refinement parameters for compounds 4-7</b>                                                                                 | <b>24-25</b> |
| <b>Table S2</b>  | <b>Crystal data and structure refinement parameters for compound 11</b>                                                                                   | <b>26-27</b> |
| <b>Figure S1</b> | <b>Molecular structure of compound 6</b>                                                                                                                  | <b>28</b>    |
| <b>Figure S2</b> | <b>Molecular structure of compound 7</b>                                                                                                                  | <b>29</b>    |
| <b>Figure S3</b> | <b>Intermolecular interactions in compound 6</b>                                                                                                          | <b>29</b>    |
|                  | <b><sup>1</sup>H NMR spectra for the entries in Table 1</b>                                                                                               | <b>30-33</b> |
|                  | <b>NMR data for the hydroborylated products in Table 2</b>                                                                                                | <b>34-37</b> |
|                  | <b><sup>1</sup>H and <sup>13</sup>C NMR spectra of the hydroborylated products in Table 2</b>                                                             | <b>38-71</b> |
| <b>Figure S4</b> | <b><sup>11</sup>B NMR spectrum for the reaction mixture containing compound 4 and HBpin (in a 1:1 molar ratio) in C<sub>6</sub>D<sub>6</sub> (0.4 mL)</b> | <b>72</b>    |
|                  | <b>References</b>                                                                                                                                         | <b>73</b>    |

## Experimental section

All experiments and manipulations were carried out in an atmosphere of dry dinitrogen using either standard schlenk or glove box [GP(Concept)-T2, Jacomex] techniques. Solvents were dried using conventional procedures.  $[(t\text{-Bu})_2\text{ATI}]\text{GeCl}$  (**1**)<sup>S1</sup> and  $[(i\text{-Bu})_2\text{ATI}]\text{GeCl}$  (**2**)<sup>S2</sup> were prepared according to literature procedures. AgOTf, NaBH<sub>4</sub> and LiI were purchased from Sigma-Aldrich, and were used without any further purification. GaCl<sub>3</sub> and HBPIn were purchased from Alfa Aesar and used without any further purification. All the aldehydes (except solid aldehydes) and ketones were distilled over anhydrous MgSO<sub>4</sub> prior to use. Melting points were measured in sealed glass capillaries using Unitech sales digital melting point apparatus, and the reported melting points are uncorrected. Elemental analyses were carried out on a Perkin-Elmer CHN analyzer. <sup>1</sup>H, <sup>13</sup>C, and <sup>19</sup>F spectra were recorded on a 300 MHz / 400 MHz Bruker Topspin NMR spectrometer using dry CDCl<sub>3</sub>. Chemical shifts ( $\delta$ ) are expressed in ppm. The referencing was done internally with respect to the residual solvent (for <sup>1</sup>H NMR) and solvent resonances (for <sup>13</sup>C NMR). In the case <sup>19</sup>F NMR spectroscopic studies, CFC<sub>3</sub> was used as an external standard.

**Synthesis of  $[(t\text{-Bu})_2\text{ATI}]\text{GeOTf}$  (**3**).** A solution of compound **1** (1.00 g, 2.95 mmol) in dichloromethane (40 mL) was transferred to a suspension of AgOTf (0.76 g, 2.95 mmol) in dichloromethane (30 mL) at -78 °C. Then, the reaction mixture was brought to room temperature, stirred for 30 min, filtered through a G4 frit, and the filtrate was reduced under reduced pressure to afford compound **3** as a yellow solid. Washing this solid with hexane and drying under reduced pressure afforded an analytically pure sample of compound **3**. Yield: 1.12 g, 84%. Mp: 119 °C. Anal. Calcd for C<sub>16</sub>H<sub>23</sub>F<sub>3</sub>GeN<sub>2</sub>O<sub>3</sub>S (M = 453.06): C, 42.42; H, 5.12; N, 6.18 Found: C, 42.67; H, 5.43; N, 5.94. <sup>1</sup>H NMR (300 MHz, CDCl<sub>3</sub>):  $\delta$  1.83 (s, 18H, C(CH<sub>3</sub>)<sub>3</sub>), 7.16 (t, <sup>3</sup>J<sub>HH</sub> = 8.7 Hz, 1H, CH), 7.54-7.67 (m, 4H, CH). <sup>13</sup>C{<sup>1</sup>H} NMR (75 MHz, CDCl<sub>3</sub>):  $\delta$  31.30 (C(CH<sub>3</sub>)<sub>3</sub>), 57.80 (C(CH<sub>3</sub>)<sub>3</sub>), 121.52 (C<sub>4</sub>), 121.88 (CF<sub>3</sub>), 127.65 (C<sub>2,6</sub>), 135.91 (C<sub>3,5</sub>), 160.48 (C<sub>1,7</sub>). <sup>19</sup>F{<sup>1</sup>H} NMR (282 MHz, CDCl<sub>3</sub>):  $\delta$  -78.06.

**Synthesis of  $[(i\text{-Bu})_2\text{ATI}]\text{GeOTf}$  (**4**).** A dichloromethane solution (40 mL) of compound **2** (1.00 g, 2.95 mmol) was transferred to a suspension of AgOTf (0.76 g, 2.95 mmol) in dichloromethane (30 mL) at -78 °C. Then, the reaction mixture was brought to room temperature, stirred for 30 minutes, filtered through a G4 frit, and the solvent from the filtrate was removed under reduced pressure to result compound **4** as

a yellow solid. Washing with hexane and drying for long time under reduced pressure gave the analytically pure sample of this compound. Single crystals suitable for X-ray diffraction analysis were obtained from its solution in a mixture of dichloromethane and toluene at -40 °C. Yield: 1.21 g, 88%. Mp: 101 °C. Anal. Calcd for  $C_{16}H_{23}F_3GeN_2O_3S$  (M = 453.06): C, 42.42; H, 5.12; N, 6.18 Found: C, 42.19; H, 5.23; N, 6.01.  $^1H$  NMR (300 MHz,  $CDCl_3$ ):  $\delta$  1.06 (d,  $^3J_{HH}$  = 6.6 Hz, 12H,  $CH(CH_3)_2$ ), 2.19-2.30 (m, 2H,  $CH(CH_3)_2$ ), 3.74 (d,  $^3J_{HH}$  = 7.2 Hz, 4H,  $CH_2$ ), 7.16 (t,  $^3J_{HH}$  = 9.6 Hz, 1H,  $CH$ ), 7.24 (d,  $^3J_{HH}$  = 11.4 Hz, 2H,  $CH$ ), 7.63 (t,  $^3J_{HH}$  = 9 Hz, 2H,  $CH$ ).  $^{13}C\{^1H\}$  NMR (75 MHz,  $CDCl_3$ ):  $\delta$  21.06 ( $CH(CH_3)_2$ ), 28.10 ( $CH(CH_3)_2$ ), 54.22 ( $CH_2$ ), 118.20 ( $C_4$ ), 121.86 ( $CF_3$ ), 127.81 ( $C_{2,6}$ ), 137.73 ( $C_{3,5}$ ), 160.55 ( $C_{1,7}$ ).  $^{19}F\{^1H\}$  NMR (282 MHz,  $CDCl_3$ ):  $\delta$  -77.97.

**Synthesis of [(*i*-Bu) $_2$ ATiGe][GaCl $_4$ ] (5).** A solution of GaCl $_3$  (0.52 g, 2.95 mmol) in dichloromethane (10 mL) was transferred to a solution of compound **2** (1.00 g, 2.95 mmol) in dichloromethane (20 mL) at -78 °C. Then, the reaction mixture was allowed to stir for 1h at ambient temperature. Removal of solvent under reduced pressure resulted in a yellow solid of compound **5**. Washing with hexane and drying *in vacuo* produced an analytically pure sample of compound **5**. Single crystals suitable for the X-ray diffraction analysis were grown by cooling its solution in dichloromethane and toluene at -40 °C. Yield: 1.43 g, 94%. Mp: 84 °C. Anal. Calcd for  $C_{15}H_{23}Cl_4GaGeN_2$  (M = 515.53): C, 34.95; H, 4.50; N, 5.43 Found: C, 34.71; H, 4.64; N, 5.21.  $^1H$  NMR (300 MHz,  $CDCl_3$ ):  $\delta$  1.09 (d,  $^3J_{HH}$  = 6.6 Hz, 12H,  $CH(CH_3)_2$ ), 2.21-2.34 (m, 2H,  $CH(CH_3)_2$ ), 3.98 (d,  $^3J_{HH}$  = 7.2 Hz, 4H,  $CH_2$ ), 7.61-7.71 (m, 3H,  $CH$ ), 7.96-8.03 (m, 2H,  $CH$ ).  $^{13}C\{^1H\}$  NMR (75 MHz,  $CDCl_3$ ):  $\delta$  21.24 ( $CH(CH_3)_2$ ), 28.39 ( $CH(CH_3)_2$ ), 55.16 ( $CH_2$ ), 121.52 ( $C_4$ ), 133.28 ( $C_{2,6}$ ), 138.39 ( $C_{3,5}$ ), 159.45 ( $C_{1,7}$ ).

**Synthesis of [(*t*-Bu) $_2$ ATiGeI] (6).** Compound **3** (1.00 g, 2.21 mmol) and lithium iodide (0.89 g, 6.62 mmol) were mixed in dichloromethane (40 mL) at room temperature. The resulting mixture was stirred for 2 days, filtered through a G4 frit, and the solvent from the filtrate was removed *in vacuo* to yield compound **6** as a yellow solid. Washing with hexane and drying under reduced pressure gave an analytically pure sample of this compound. Single crystals suitable for X-ray diffraction analysis were grown from its solution in dichloromethane and toluene at -40 °C. Yield: 0.87 g, 92%. Mp: 137 °C. Anal. Calcd for  $C_{15}H_{23}GeIN_2$  (M = 430.90): C, 41.81; H, 5.38; N, 6.50 Found: C, 42.05; H, 5.47; N, 6.39.  $^1H$  NMR (300 MHz,  $CDCl_3$ ):  $\delta$  1.83 (s, 18H,  $C(CH_3)_3$ ), 6.93 (t,  $^3J_{HH}$  = 9.0 Hz, 1H,  $CH$ ), 7.30-7.43

(m, 4H, CH).  $^{13}\text{C}\{^1\text{H}\}$  NMR (75 MHz,  $\text{CDCl}_3$ ):  $\delta$  30.11 ( $\text{C}(\text{CH}_3)_3$ ), 57.82 ( $\text{C}(\text{CH}_3)_3$ ), 121.22 ( $\text{C}_4$ ), 125.03 ( $\text{C}_{2,6}$ ), 135.51 ( $\text{C}_{3,5}$ ), 161.18 ( $\text{C}_{1,7}$ ).

**Synthesis of [(*i*-Bu) $_2$ ATI $\text{GeI}$ ] (7).** To compound **4** (1.00 g, 2.21 mmol) and lithium iodide (0.89 g, 6.62 mmol) in a Schlenk flask, dichloromethane (20 mL) was added at room temperature. The resulting mixture was stirred for 2 days, and the solvent was removed under reduced pressure to yield an orange solid. This solid was extracted using toluene (60 mL) and filtered through a G4 frit. Removal of solvent from the filtrate afforded compound **7** as a yellow solid. Washing using hexane and drying through a vacuum pump afforded an analytically pure sample of compound **7**. Single crystals suitable for X-ray diffraction analysis were grown from its toluene solution at  $-40\text{ }^\circ\text{C}$ . Yield: 0.84 g, 90%. Mp:  $125\text{ }^\circ\text{C}$ . Anal. Calcd for  $\text{C}_{15}\text{H}_{23}\text{GeIN}_2$  ( $M = 430.90$ ): C, 41.81; H, 5.38; N, 6.50 Found: C, 41.98; H, 5.26; N, 6.28.  $^1\text{H}$  NMR (300 MHz,  $\text{CDCl}_3$ ):  $\delta$  1.05 (d,  $^3J_{\text{HH}} = 6.6\text{ Hz}$ , 12H,  $\text{CH}(\text{CH}_3)_2$ ), 2.19-2.32 (m, 2H,  $\text{CH}(\text{CH}_3)_2$ ), 3.55 (d,  $^3J_{\text{HH}} = 7.2\text{ Hz}$ , 4H, CH $_2$ ), 6.88-6.99 (m, 3H, CH), 7.35 (t,  $^3J_{\text{HH}} = 9\text{ Hz}$ , 2H, CH).  $^{13}\text{C}\{^1\text{H}\}$  NMR (75 MHz,  $\text{CDCl}_3$ ):  $\delta$  21.22 ( $\text{CH}(\text{CH}_3)_2$ ), 28.02 ( $\text{CH}(\text{CH}_3)_2$ ), 54.50 ( $\text{CH}_2$ ), 117.65 ( $\text{C}_4$ ), 124.89 ( $\text{C}_{2,6}$ ), 137.27 ( $\text{C}_{3,5}$ ), 161.47 ( $\text{C}_{1,7}$ ).

**Synthesis of [(*t*-Bu) $_2$ ATI $\text{Ge}(\text{H})\text{BH}_3$ ] (11).** To a solution of compound **1** (0.40 g, 1.17 mmol) in THF (25 mL),  $\text{NaBH}_4$  (0.05 g, 1.28 mmol) was added and stirred for 24 h at room temperature. After that, THF was removed under reduced pressure to get a red solid. It was extracted into toluene and filtered through a G4 frit with Celite. Removal of toluene from the filtrate afforded compound **11** as a red solid. Washing it using hexane and drying through a vacuum pump afforded an analytically pure sample of compound **11**. Single crystals suitable for X-ray diffraction analysis were grown from its toluene solution at  $-40\text{ }^\circ\text{C}$ . Yield: 0.371 g, 99%.  $^1\text{H}$  NMR (500 MHz,  $\text{C}_6\text{D}_6$ ):  $\delta$  1.38 (s, 18H,  $\text{C}(\text{CH}_3)_3$ ), 6.00-6.03 (m, 1H, CH), 6.44-6.47 (m, 4H, CH) 7.72 (bs, 1H,  $\text{GeH}$ ).  $^{13}\text{C}\{^1\text{H}\}$  NMR (125 MHz,  $\text{C}_6\text{D}_6$ ):  $\delta$  28.70 ( $\text{C}(\text{CH}_3)_3$ ), 56.91 ( $\text{C}(\text{CH}_3)_3$ ), 118.23 ( $\text{C}_4$ ), 121.11 ( $\text{C}_{2,6}$ ), 136.58 ( $\text{C}_{3,5}$ ), 160.32 ( $\text{C}_{1,7}$ ).  $^{11}\text{B}\{^1\text{H}\}$  (128 MHz,  $\text{C}_6\text{H}_6$ ):  $\delta$  -31.01 (s,  $\text{BH}_3$ ).

**General procedure for the catalytic hydroboration of carbonyl compounds:** Aldehydes/ketones (1 mmol), pinacolborane (1.1 mmol), and [(*i*-Bu) $_2$ ATI]GeOTf (**4**) (1 mol% - 5 mol%) (for details, see Table 2) were taken in a Schlenk flask. This reaction mixture was stirred at room temperature/elevated temperature for the required time period (for details, see Table 2). Progress of the reactions was monitored by  $^1\text{H}$  NMR spectroscopy (for details, see the footnote of Table 1).

## NMR spectra of compounds 3-7

$^1\text{H}$  NMR spectrum of compound **3**

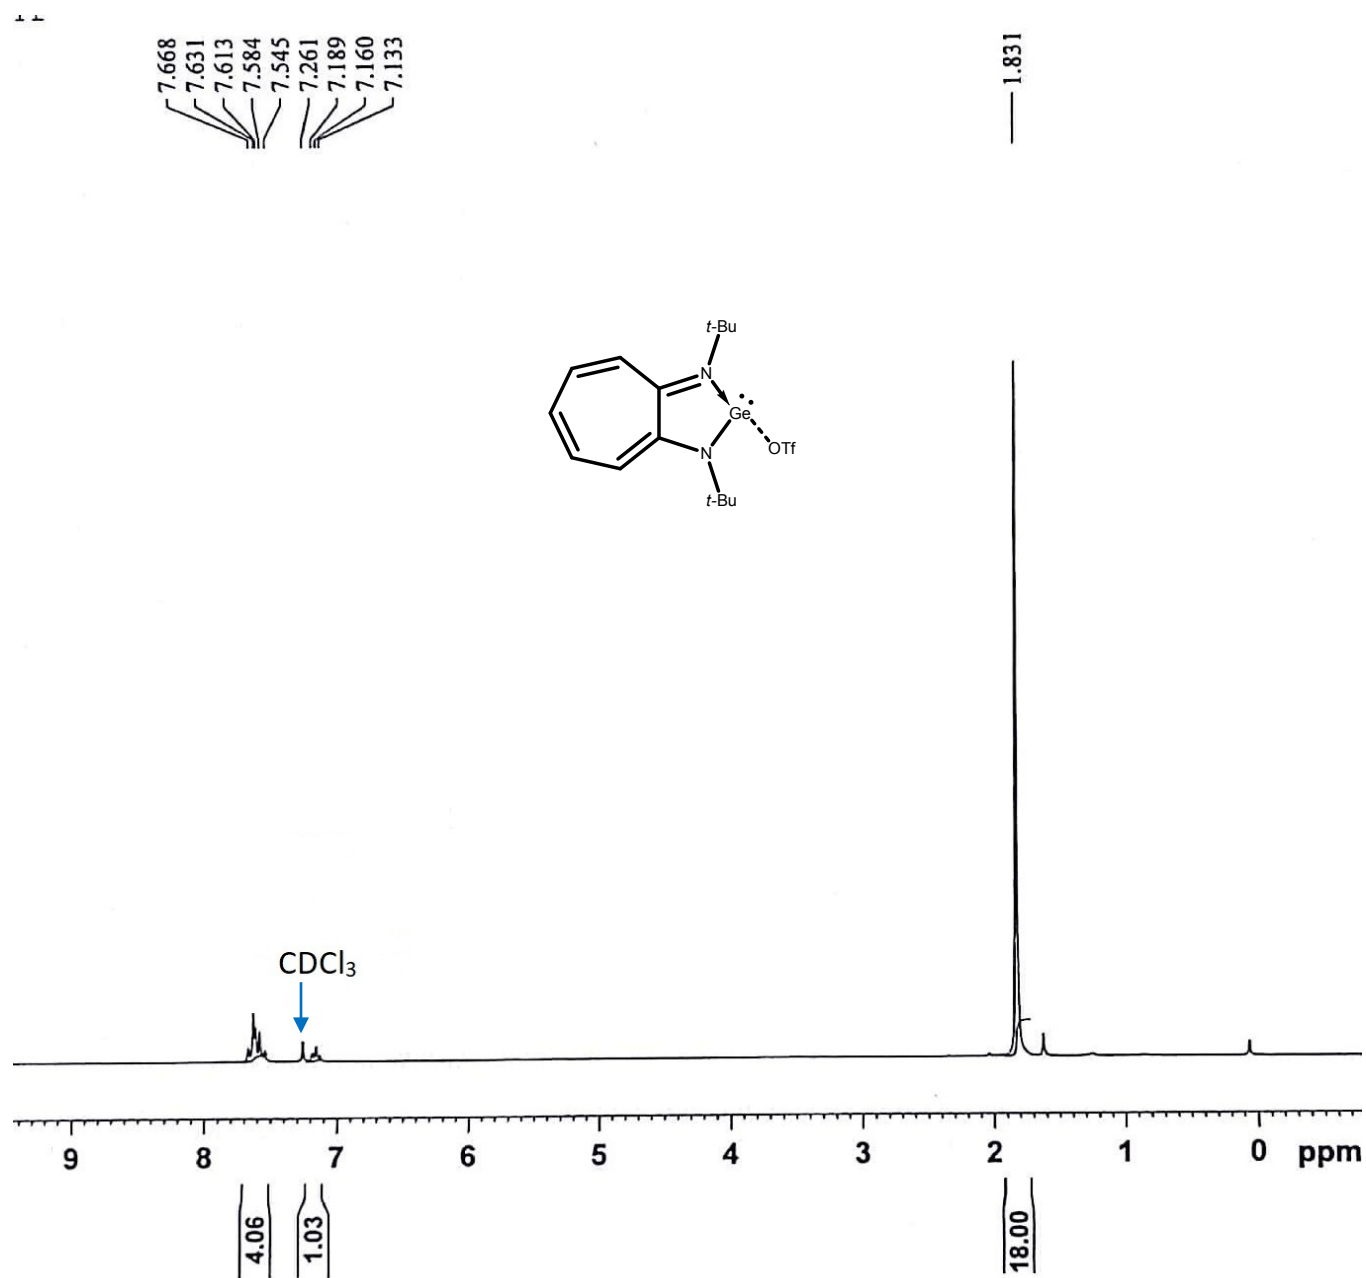

$^{13}\text{C}$  NMR spectrum of compound **3**

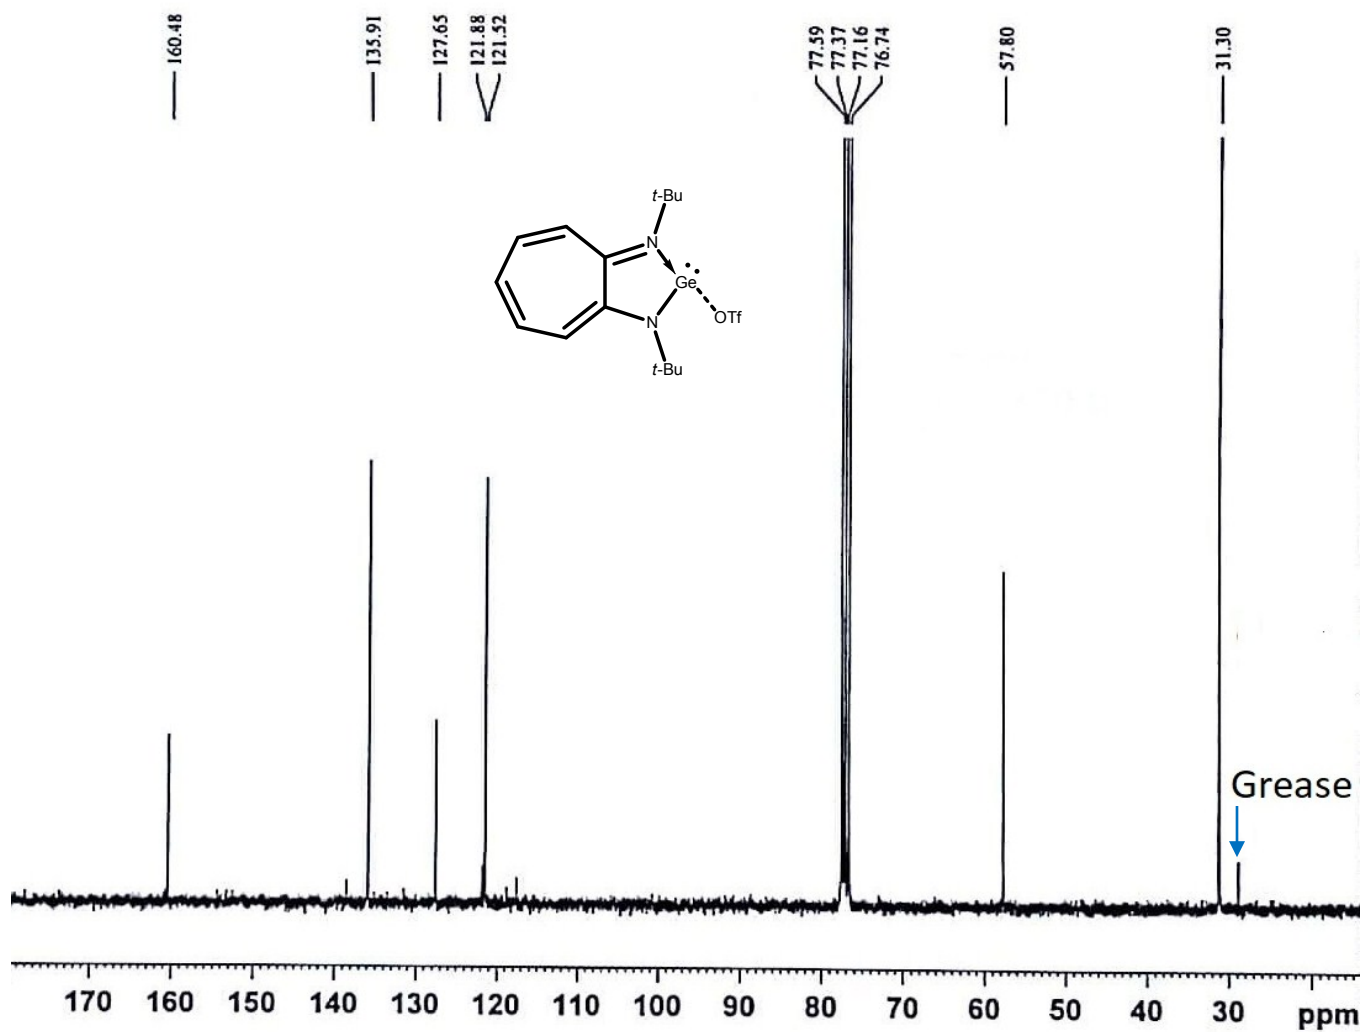

$^{19}\text{F}$  NMR spectrum of compound **3**

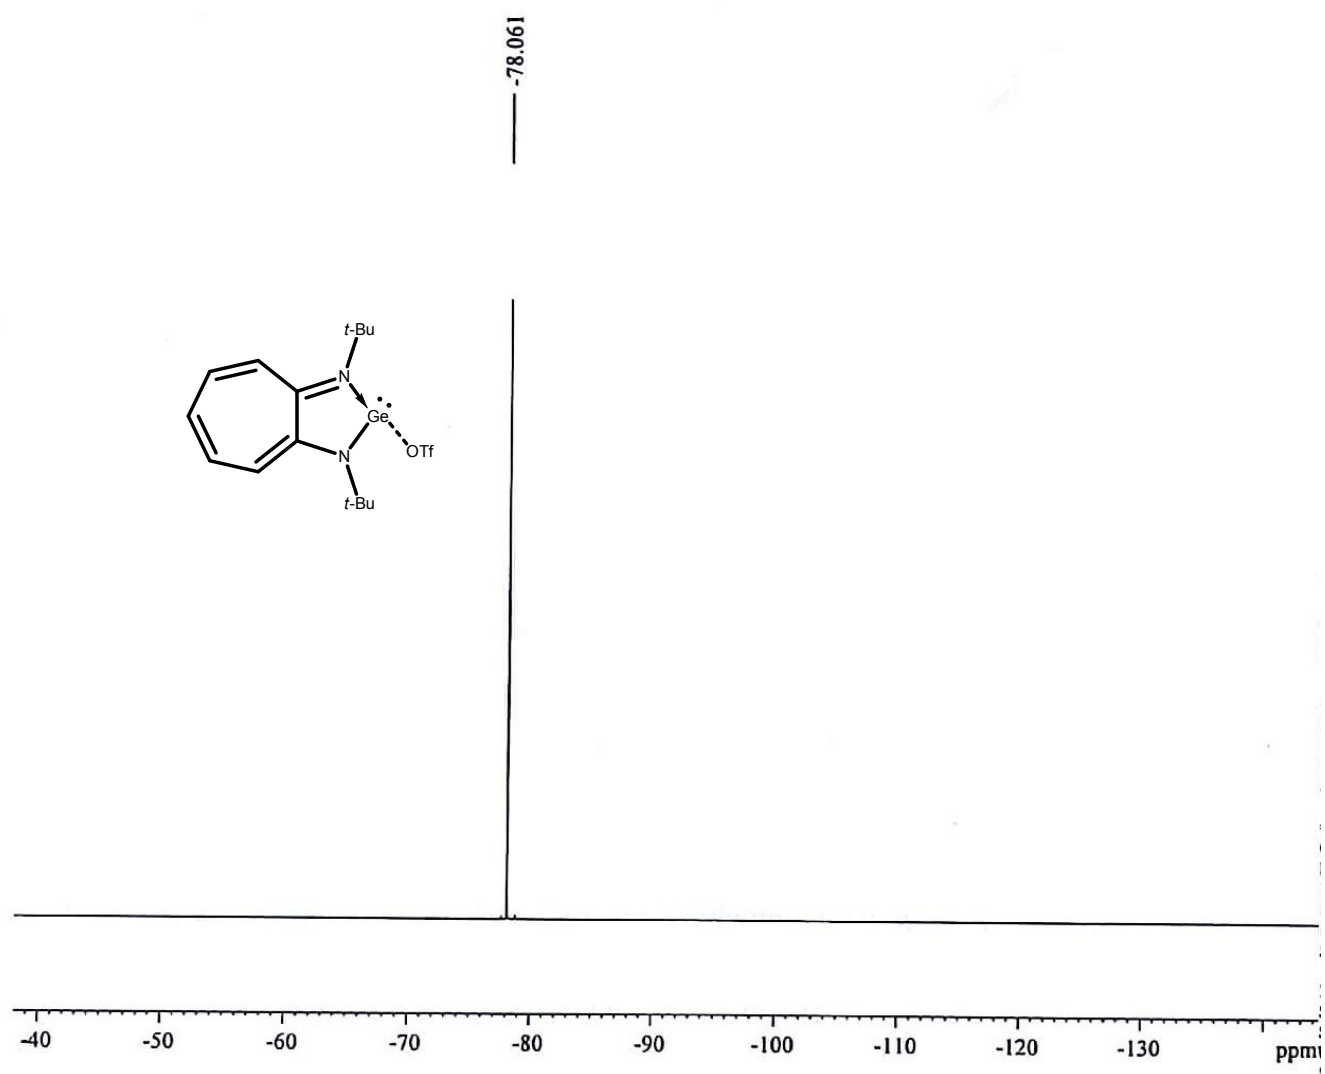



<sup>1</sup>H NMR spectrum of compound **4**

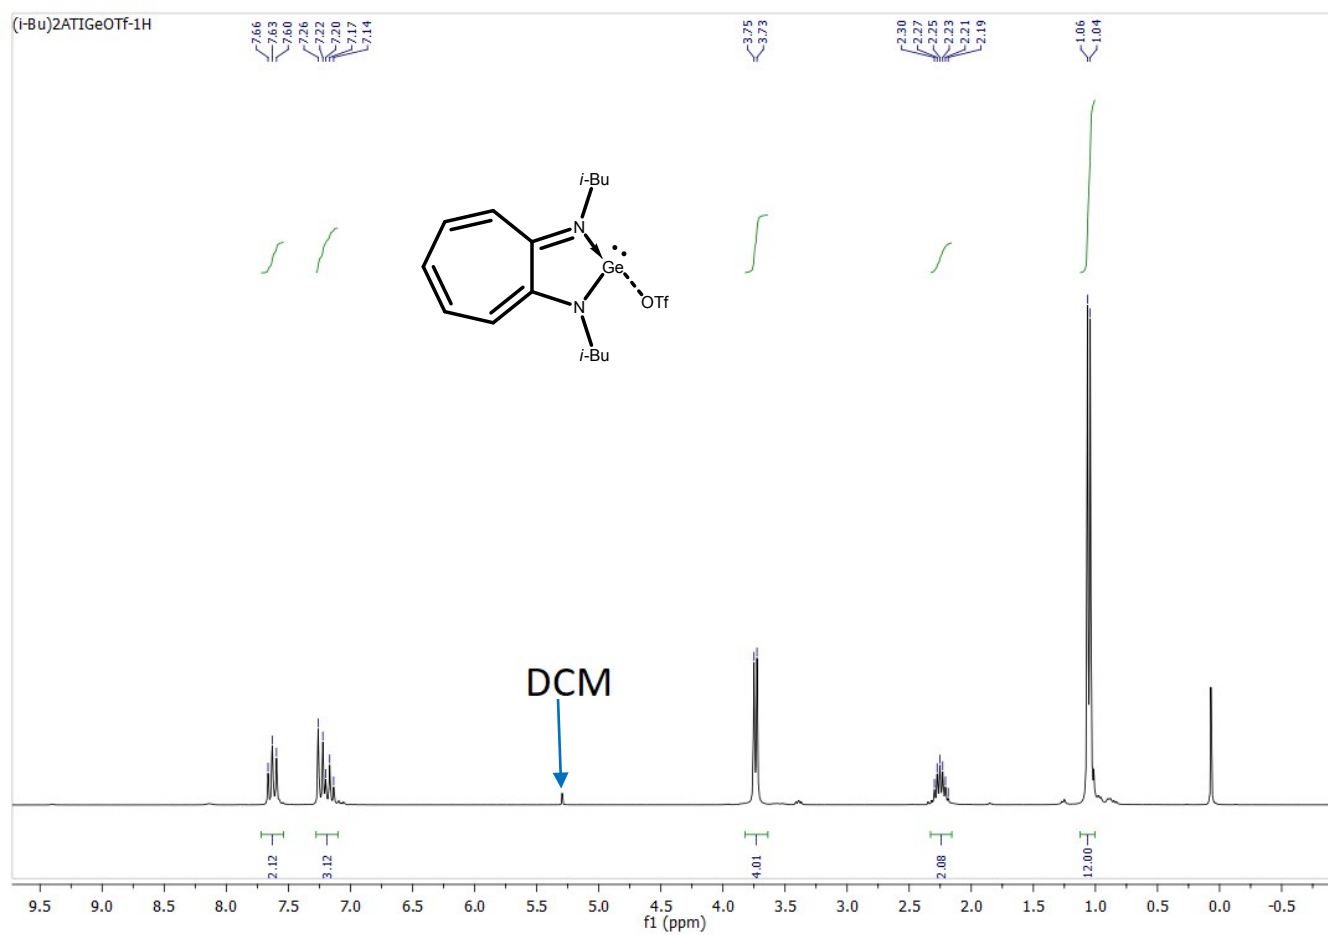

$^{13}\text{C}$  NMR spectrum of compound **4**

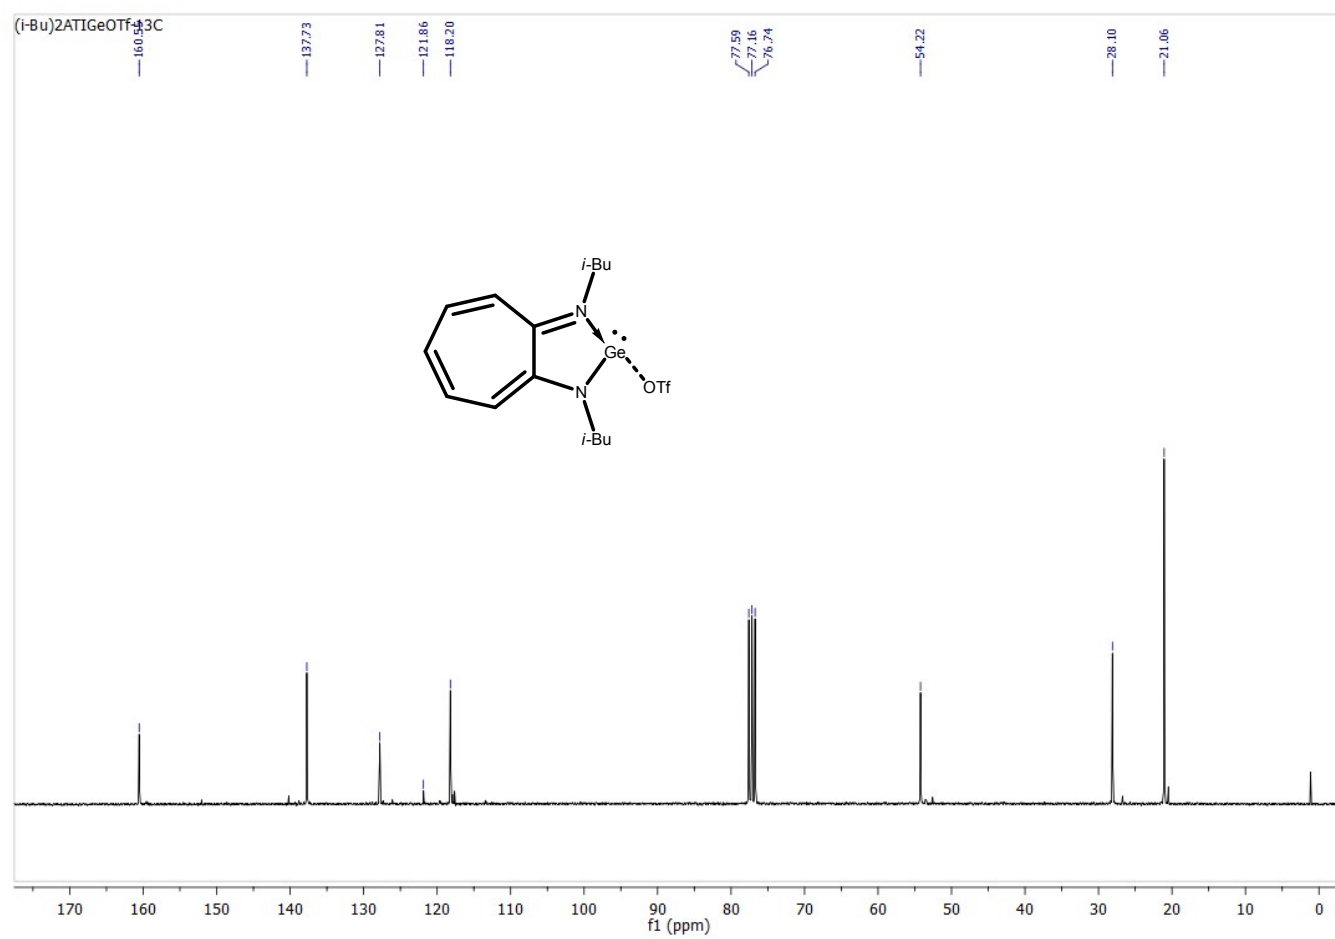

$^{19}\text{F}$  NMR spectrum of compound **4**

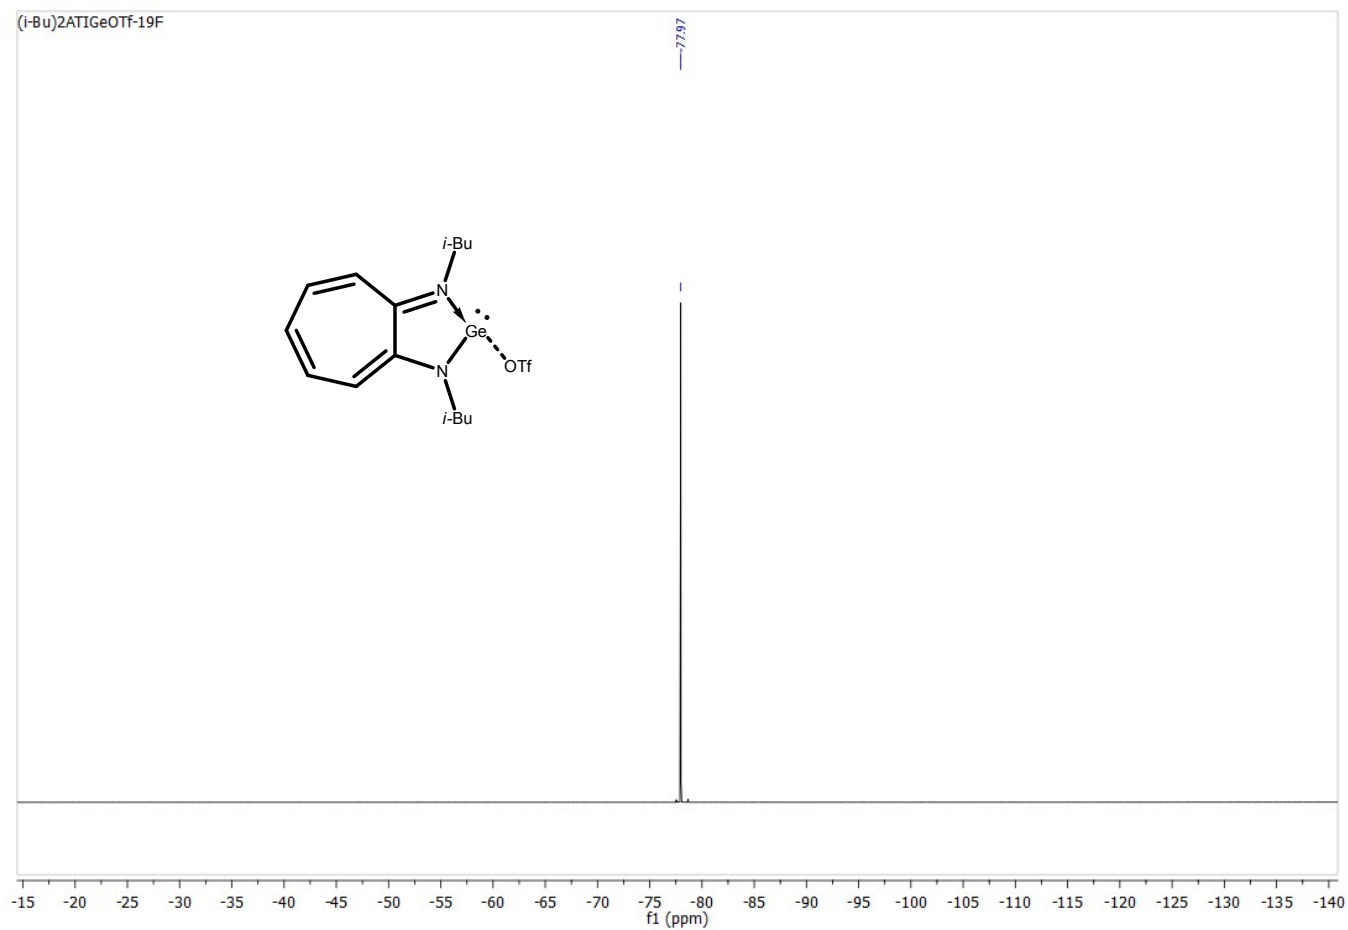

$^1\text{H}$  NMR spectrum of compound **5**

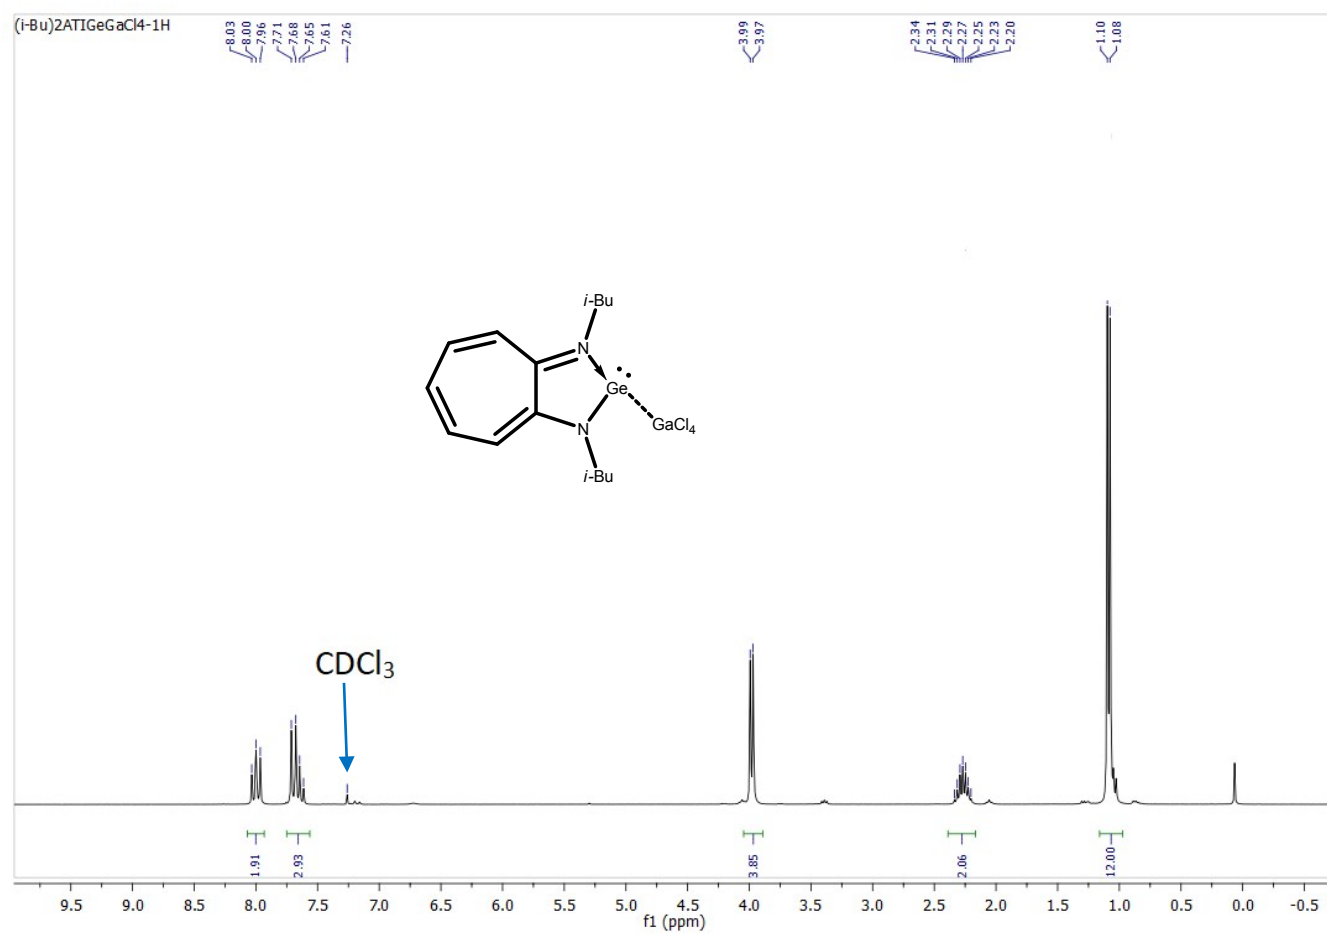

$^{13}\text{C}$  NMR spectrum of compound **5**

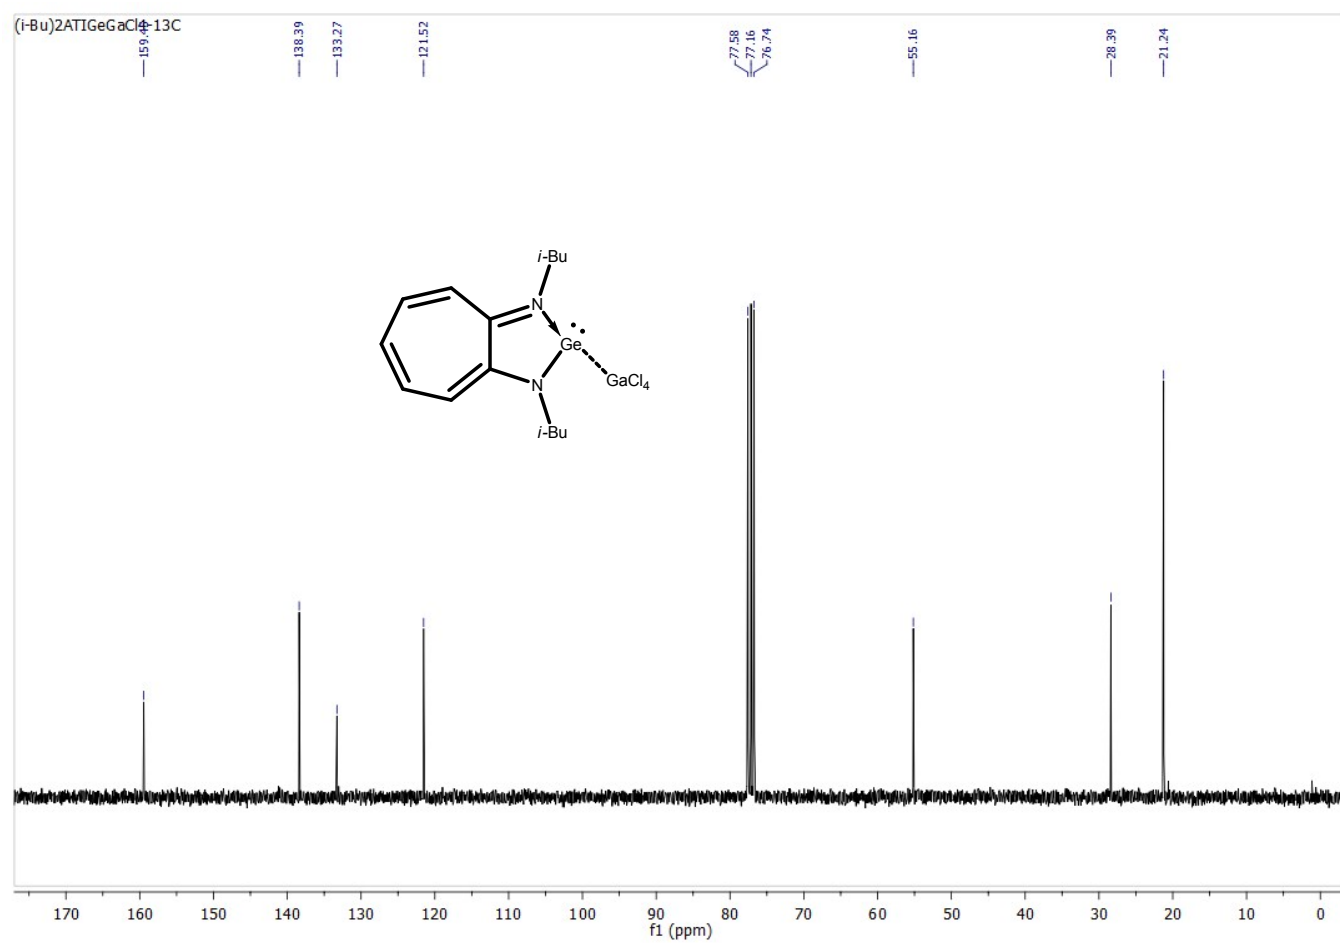

$^1\text{H}$  NMR spectrum of compound **6**

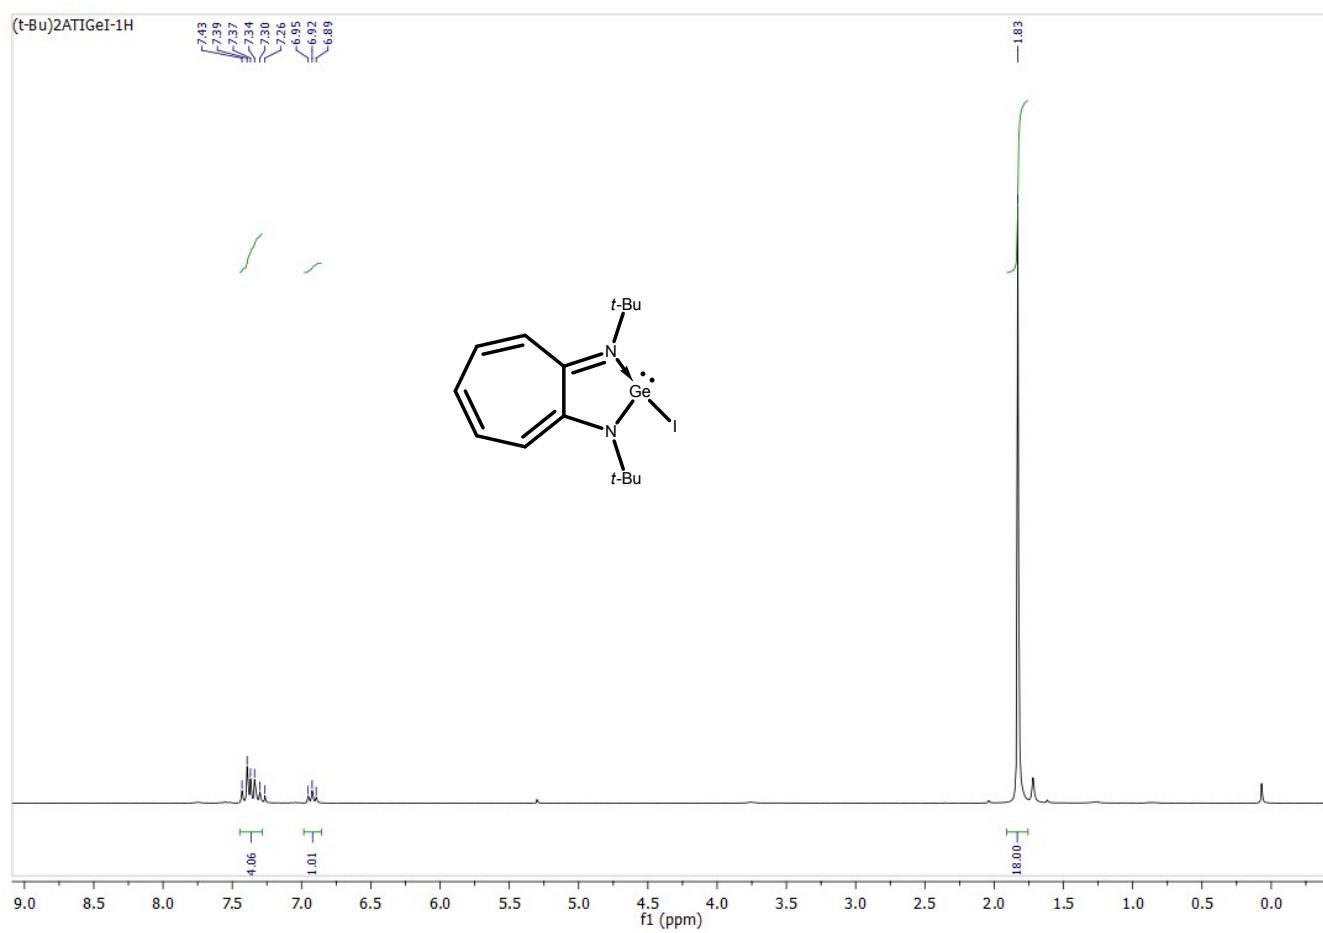

$^{13}\text{C}$  NMR spectrum of compound **6**

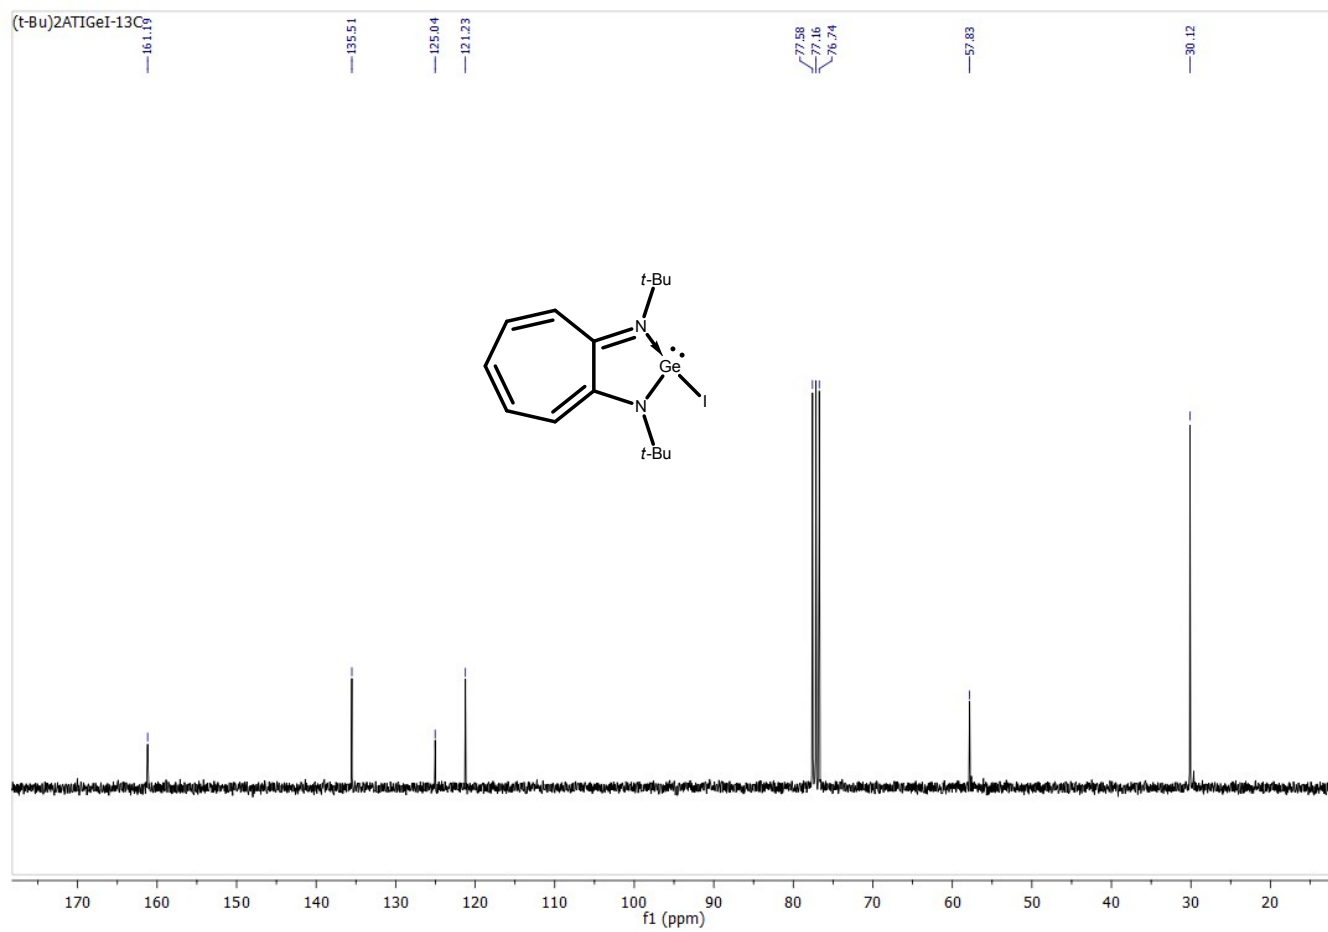

$^1\text{H}$  NMR spectrum of compound **7**

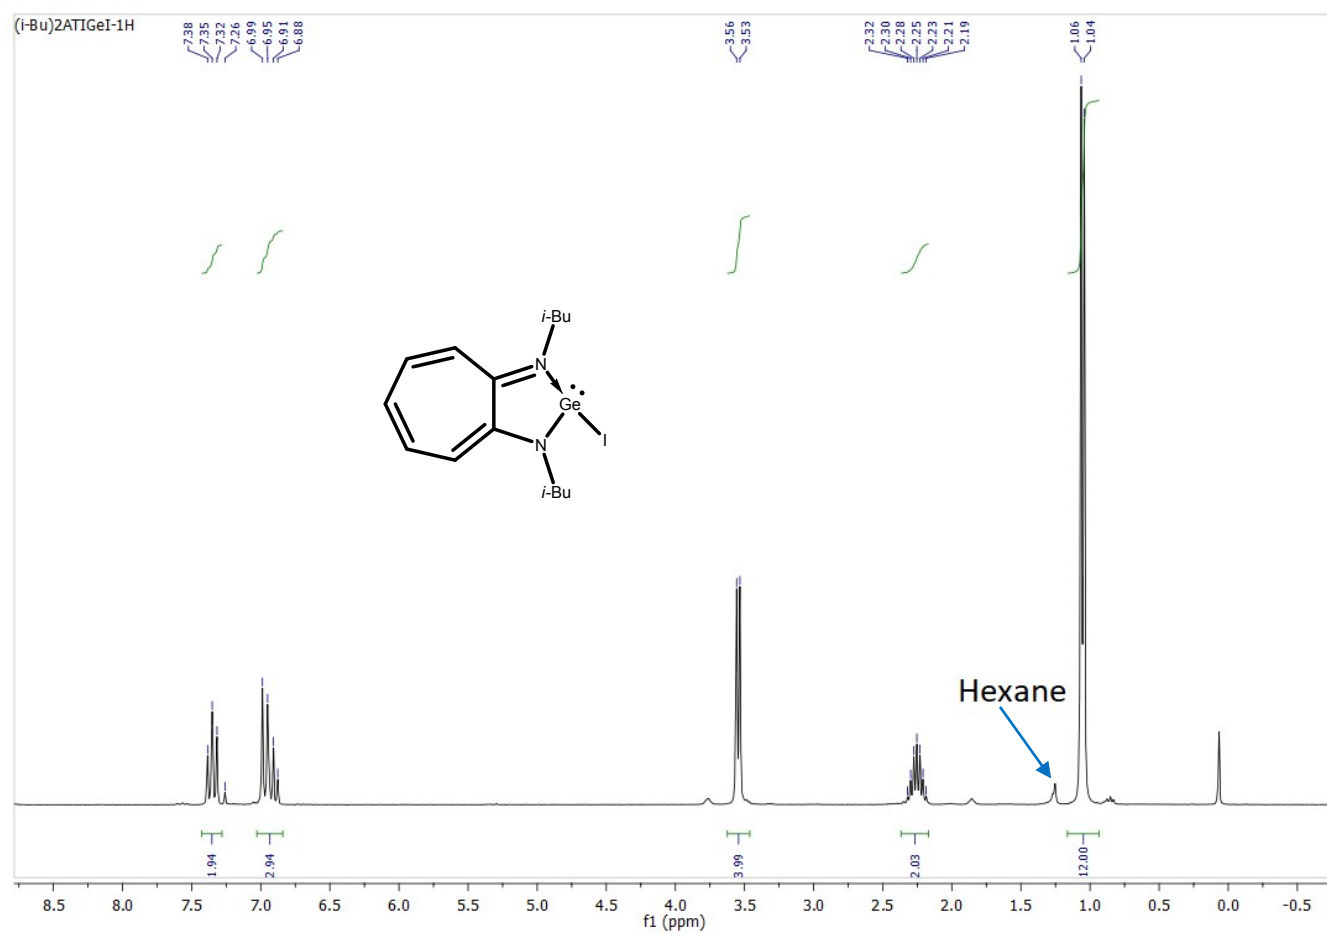



$^{13}\text{C}$  NMR spectrum of compound **7**

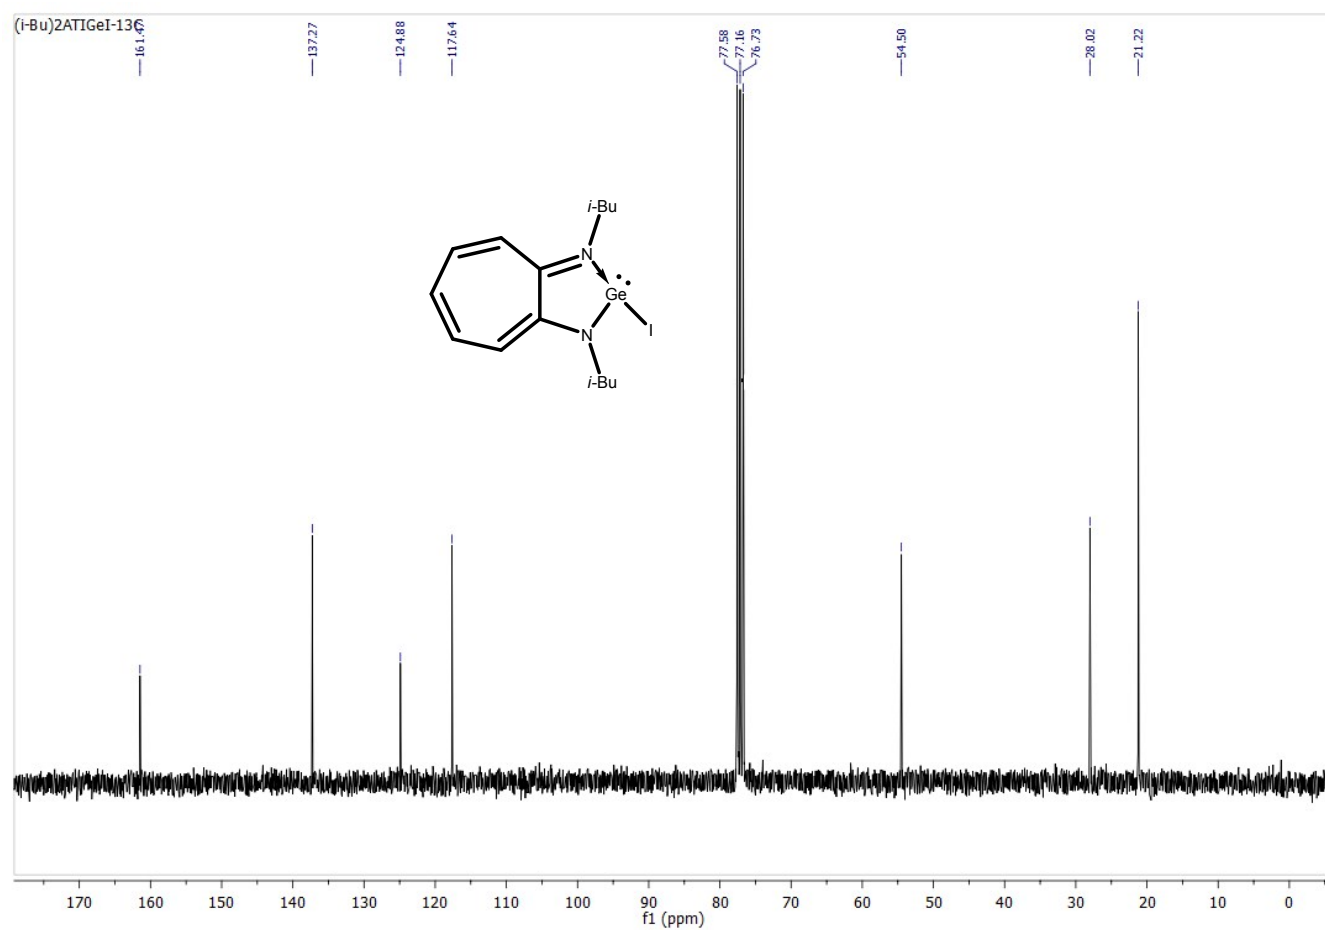

## Computational details

GAUSSIAN-09 programs were used for carrying out the computational studies on compound **4**.<sup>S5-S6</sup> The B3LYP level of theory was used for geometry optimization; (a) for germanium atom, LANL2DZ basis set with ECP core potential was used, and (b) 6-31+G\* basis set was employed for the rest of the elements. Further, for the geometry optimization, coordinates obtained from single crystal X-ray diffraction studies were used. The optimized structure of compound **4** is shown in Figure S4; it was drawn through Chemcraft software using the optimized coordinates. The aforementioned level of theory and optimized coordinates were used for calculating the NPA<sup>S7</sup> charges.

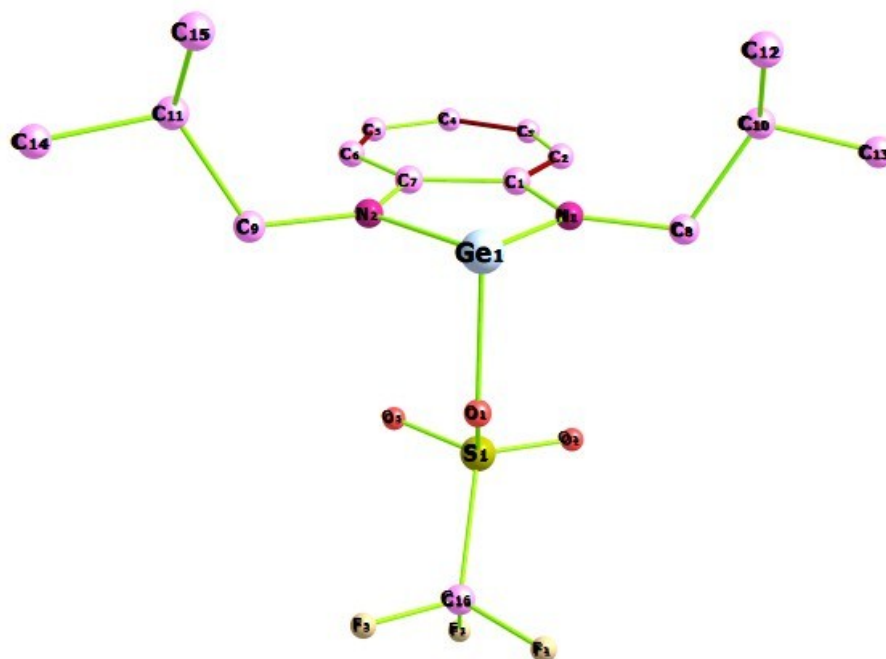

**Figure S4: Optimized structure of compound 4.** Hydrogen atoms are omitted for clarity.

### **Coordinates for the optimized geometry of compound 4**

|    |              |              |              |
|----|--------------|--------------|--------------|
| 32 | 0.000645000  | -0.001577000 | -1.534785000 |
| 8  | 1.744075000  | -0.094276000 | -0.765609000 |
| 8  | 1.923365000  | -1.625511000 | 1.215408000  |
| 8  | 1.720203000  | 0.873986000  | 1.552344000  |
| 7  | -0.875928000 | -1.236600000 | -0.191374000 |
| 7  | -0.739091000 | 1.324860000  | -0.193639000 |
| 16 | 2.181074000  | -0.263280000 | 0.755869000  |
| 6  | -1.609237000 | -0.660457000 | 0.752450000  |
| 6  | -2.358512000 | -1.447973000 | 1.684930000  |
| 1  | -2.281781000 | -2.515940000 | 1.525516000  |
| 6  | -3.146023000 | -1.086674000 | 2.763117000  |
| 1  | -3.591167000 | -1.917632000 | 3.304135000  |
| 6  | -3.447015000 | 0.190481000  | 3.261340000  |
| 1  | -4.097871000 | 0.226042000  | 4.130532000  |
| 6  | -2.994039000 | 1.425949000  | 2.774013000  |
| 1  | -3.334543000 | 2.299872000  | 3.323226000  |
| 6  | -2.171800000 | 1.698387000  | 1.695438000  |
| 1  | -1.968334000 | 2.750742000  | 1.543253000  |
| 6  | -1.525705000 | 0.834441000  | 0.753771000  |
| 6  | -0.741245000 | -2.692636000 | -0.377720000 |
| 1  | -0.565584000 | -3.154766000 | 0.598087000  |
| 1  | 0.178012000  | -2.844692000 | -0.952946000 |
| 6  | -0.426339000 | 2.752037000  | -0.372325000 |

|   |              |              |              |
|---|--------------|--------------|--------------|
| 1 | 0.497469000  | 2.792448000  | -0.960002000 |
| 1 | -0.186483000 | 3.183664000  | 0.604109000  |
| 6 | -1.919685000 | -3.382436000 | -1.113049000 |
| 1 | -2.838173000 | -3.193846000 | -0.539761000 |
| 6 | -1.515155000 | 3.589703000  | -1.092969000 |
| 1 | -2.435221000 | 3.539999000  | -0.494088000 |
| 6 | -2.128545000 | -2.843772000 | -2.534773000 |
| 1 | -2.390244000 | -1.780012000 | -2.547709000 |
| 1 | -2.945633000 | -3.380983000 | -3.025674000 |
| 1 | -1.229774000 | -2.983034000 | -3.147777000 |
| 6 | -1.660697000 | -4.897625000 | -1.122699000 |
| 1 | -0.751275000 | -5.139798000 | -1.684667000 |
| 1 | -2.493403000 | -5.422714000 | -1.599711000 |
| 1 | -1.547136000 | -5.300057000 | -0.110289000 |
| 6 | -1.048308000 | 5.053238000  | -1.137978000 |
| 1 | -0.845831000 | 5.450226000  | -0.137350000 |
| 1 | -1.815571000 | 5.682728000  | -1.598168000 |
| 1 | -0.134034000 | 5.157481000  | -1.733558000 |
| 6 | -1.835027000 | 3.061297000  | -2.497646000 |
| 1 | -2.579525000 | 3.701161000  | -2.980696000 |
| 1 | -2.245781000 | 2.045767000  | -2.479653000 |
| 1 | -0.942377000 | 3.058349000  | -3.135133000 |
| 6 | 4.041922000  | -0.078178000 | 0.501027000  |
| 9 | 4.480667000  | -1.034280000 | -0.315027000 |

|   |             |              |              |
|---|-------------|--------------|--------------|
| 9 | 4.631628000 | -0.190014000 | 1.690065000  |
| 9 | 4.303582000 | 1.120052000  | -0.022380000 |

## **X-ray crystal structure determination of compounds 4-7 and 11**

X-ray data of these compounds were collected on a Bruker SMART APEX CCD diffractometer using Mo K $\alpha$  radiation ( $\lambda = 0.71073$  Å). The crystals were covered with Paratone-N and loaded on a glass fiber. The data were collected under a steady flow of cold dinitrogen or at room temperature. SAINT was used for the integration of data and SADABS was used for applying an empirical absorption correction.<sup>S3</sup> The structures were solved by direct methods and refined by full matrix least-squares on  $F^2$  using SHELXTL.<sup>S4</sup> All non-hydrogen atoms were refined anisotropically; the positions of hydrogen atoms were fixed according to a riding model and were refined isotropically. The important crystallographic data for compounds **4-7** and **11** are given in Tables S1 and S2, respectively.

**Table S1. Crystal data and structure refinement parameters for compounds 4-7**

|                                          | <b>4</b>                                                                                            | <b>5</b>                                                                                                 | <b>6</b>                                                                                                   | <b>7</b>                                                                                           |
|------------------------------------------|-----------------------------------------------------------------------------------------------------|----------------------------------------------------------------------------------------------------------|------------------------------------------------------------------------------------------------------------|----------------------------------------------------------------------------------------------------|
| Empirical formula                        | C <sub>16</sub> H <sub>23</sub> F <sub>3</sub> GeN <sub>2</sub> O <sub>3</sub> S                    | C <sub>15</sub> H <sub>23</sub> Cl <sub>4</sub> GaGeN <sub>2</sub>                                       | C <sub>15</sub> H <sub>23</sub> GeIN <sub>2</sub>                                                          | C <sub>15</sub> H <sub>23</sub> GeIN <sub>2</sub>                                                  |
| Formula weight                           | 453.04                                                                                              | 515.48                                                                                                   | 430.86                                                                                                     | 430.86                                                                                             |
| Temperature, K                           | 200(2)                                                                                              | 100(2)                                                                                                   | 298(2)                                                                                                     | 175(2)                                                                                             |
| Wavelength, Å                            | 0.71073                                                                                             | 0.71073                                                                                                  | 0.71073                                                                                                    | 0.71073                                                                                            |
| Crystal system                           | Monoclinic                                                                                          | Monoclinic                                                                                               | Monoclinic                                                                                                 | Monoclinic                                                                                         |
| Space group                              | <i>P</i> 2 <sub>1</sub> / <i>c</i>                                                                  | <i>P</i> 2 <sub>1</sub> / <i>n</i>                                                                       | <i>P</i> 2 <sub>1</sub> / <i>n</i>                                                                         | <i>P</i> 2 <sub>1</sub> / <i>c</i>                                                                 |
| Unit cell dimensions                     | <i>a</i> = 15.057(3) Å<br><i>b</i> = 16.433(3) Å<br><i>c</i> = 16.648(3) Å<br><i>β</i> = 93.621(4)° | <i>a</i> = 10.6849(16) Å<br><i>b</i> = 19.510(3) Å<br><i>c</i> = 10.8848(16) Å<br><i>β</i> = 109.004(3)° | <i>a</i> = 8.7656(7) Å<br><i>b</i> = 17.3579(15) Å<br><i>c</i> = 11.8312(10) Å<br><i>β</i> = 107.5640(10)° | <i>a</i> = 13.175(3) Å<br><i>b</i> = 16.047(4) Å<br><i>c</i> = 8.182(2) Å<br><i>β</i> = 90.806(5)° |
| Volume, Å <sup>3</sup>                   | 4111.0(13)                                                                                          | 2145.4(6)                                                                                                | 1716.2(2)                                                                                                  | 1729.7(7)                                                                                          |
| <i>Z</i>                                 | 8                                                                                                   | 4                                                                                                        | 4                                                                                                          | 4                                                                                                  |
| Density (calculated), Mg/m <sup>3</sup>  | 1.464                                                                                               | 1.596                                                                                                    | 1.668                                                                                                      | 1.655                                                                                              |
| Absorption coefficient, mm <sup>-1</sup> | 1.635                                                                                               | 3.154                                                                                                    | 3.574                                                                                                      | 3.547                                                                                              |
| <i>F</i> (000)                           | 1856.0                                                                                              | 1032.0                                                                                                   | 848.0                                                                                                      | 848.0                                                                                              |
| Crystal size, mm <sup>3</sup>            | 0.543 x 0.281 x 0.124                                                                               | 0.486 x 0.273 x 0.152                                                                                    | 0.532 x 0.321 x 0.283                                                                                      | 0.431 x 0.291 x 0.211                                                                              |
| <i>θ</i> range for data collection, °    | 1.36 to 25.00                                                                                       | 2.09 to 25.00                                                                                            | 2.56 to 25.00                                                                                              | 1.55 to 25.00                                                                                      |



|                                                |                                                |                                                |                                                |                                              |
|------------------------------------------------|------------------------------------------------|------------------------------------------------|------------------------------------------------|----------------------------------------------|
| Limiting indices                               | -17 ≤ h ≤ 16,<br>-19 ≤ k ≤ 18,<br>-19 ≤ l ≤ 13 | -11 ≤ h ≤ 12,<br>-20 ≤ k ≤ 23,<br>-12 ≤ l ≤ 10 | -10 ≤ h ≤ 10,<br>-20 ≤ k ≤ 17,<br>-13 ≤ l ≤ 14 | -15 ≤ h ≤ 14,<br>-19 ≤ k ≤ 14,<br>-9 ≤ l ≤ 9 |
| Reflections collected                          | 21356                                          | 11126                                          | 8839                                           | 8911                                         |
| Independent reflections                        | 7243 [ $R_{\text{int}} = 0.0552$ ]             | 3779 [ $R_{\text{int}} = 0.0308$ ]             | 3022 [ $R_{\text{int}} = 0.0205$ ]             | 3053 [ $R_{\text{int}} = 0.0437$ ]           |
| Absorption correction                          | Semi-empirical                                 | Semi-empirical                                 | Semi-empirical                                 | Semi-empirical                               |
| Refinement method                              | Full-matrix least-squares on $F^2$             | Full-matrix least-squares on $F^2$             | Full-matrix least-squares on $F^2$             | Full-matrix least-squares on $F^2$           |
| Data/restraints/parameters                     | 7233/0/477                                     | 3769/0/212                                     | 3015/0/178                                     | 3050/0/176                                   |
| Goodness-of-fit on $F^2$                       | 1.031                                          | 1.046                                          | 1.104                                          | 1.164                                        |
| Final R indices [ $I > 2\sigma(I)$ ]           | $R_1 = 0.0446$ ,<br>$wR^2 = 0.1013$            | $R_1 = 0.0324$ ,<br>$wR^2 = 0.0774$            | $R_1 = 0.0422$ ,<br>$wR^2 = 0.1226$            | $R_1 = 0.0560$ ,<br>$wR^2 = 0.1123$          |
| R indices (all data)                           | $R_1 = 0.0714$ ,<br>$wR_2 = 0.1103$            | $R_1 = 0.0389$ ,<br>$wR_2 = 0.0801$            | $R_1 = 0.0506$ ,<br>$wR_2 = 0.1350$            | $R_1 = 0.0666$ ,<br>$wR_2 = 0.1165$          |
| Largest diff. peak and hole, e.Å <sup>-3</sup> | 0.374 and -0.310                               | 0.506 and -0.293                               | 1.547 and -0.566                               | 1.158 and -0.842                             |

**Table S2. Crystal data and structure refinement parameters for compound 11**

|                                 |                                                              |
|---------------------------------|--------------------------------------------------------------|
|                                 | <b>11</b>                                                    |
| Empirical formula               | C <sub>15</sub> H <sub>26</sub> BGeN <sub>2</sub>            |
| Formula weight                  | 317.80                                                       |
| Temperature                     | 298(2) K                                                     |
| Wavelength                      | 0.71073 Å                                                    |
| Crystal system                  | Orthorhombic                                                 |
| Space group                     | <i>P</i> 2 <sub>1</sub> 2 <sub>1</sub> 2 <sub>1</sub>        |
| Unit cell dimensions            | a = 9.538(4) Å<br>b = 10.012(4) Å<br>c = 17.299(7) Å         |
| Volume                          | 1652.0(11) Å <sup>3</sup>                                    |
| <i>Z</i>                        | 4                                                            |
| Density (calculated)            | 1.278 Mg/m <sup>3</sup>                                      |
| Absorption coefficient          | 1.844 mm <sup>-1</sup>                                       |
| F(000)                          | 668                                                          |
| Crystal size                    | 0.562 x 0.31 x 0.16 mm <sup>3</sup>                          |
| Theta range for data collection | 2.350 to 24.992°                                             |
| Index ranges                    | -6 ≤ <i>h</i> ≤ 11, -11 ≤ <i>k</i> ≤ 11, -20 ≤ <i>l</i> ≤ 19 |
| Reflections collected           | 7791                                                         |
| Independent reflections         | 2893 [R(int) = 0.0439]                                       |

|                                   |                                             |
|-----------------------------------|---------------------------------------------|
| Completeness to theta = 24.992°   | 99.5 %                                      |
| Absorption correction             | Semi-empirical from equivalents             |
| Max. and min. transmission        | 0.745 and 0.509                             |
| Refinement method                 | Full-matrix least-squares on F <sup>2</sup> |
| Data / restraints / parameters    | 2893 / 0 / 179                              |
| Goodness-of-fit on F <sup>2</sup> | 1.036                                       |
| Final R indices [I>2sigma(I)]     | R1 = 0.0298, wR2 = 0.0698                   |
| R indices (all data)              | R1 = 0.0321, wR2 = 0.0707                   |
| Largest diff. peak and hole       | 0.552 and -0.222 e.Å <sup>-3</sup>          |

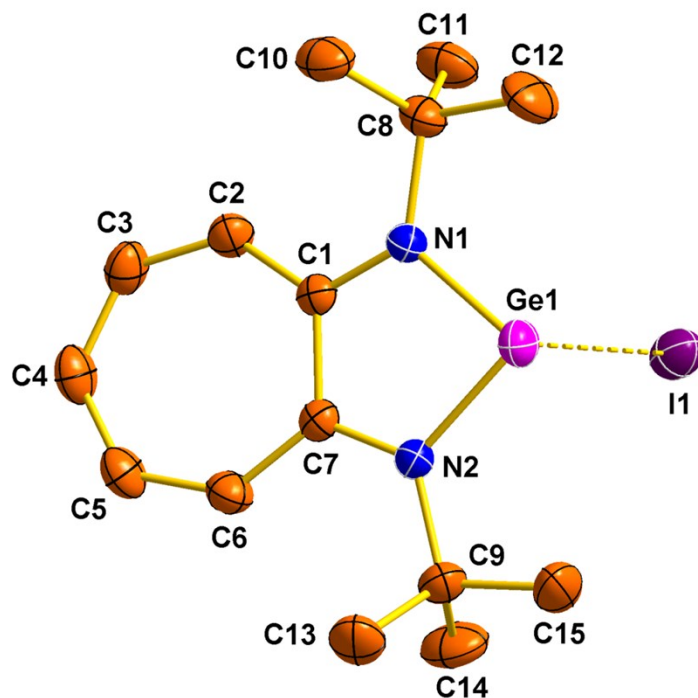

**Figure S1: Molecular structure of compound 6.** Thermal ellipsoids are shown at the 30% probability level and hydrogen atoms are omitted for clarity. Selected bond lengths (Å) and angles (deg): Ge1⋯I1 3.154(7), Ge1-N1 1.936(4), Ge1-N2 1.937(4); N1-Ge1-N2 82.10(2), N1-Ge1-I1 95.20(1), N2-Ge1-I1 94.11(1), C1-N1-Ge1 115.40(3), C7-N2-Ge1 115.50(3).

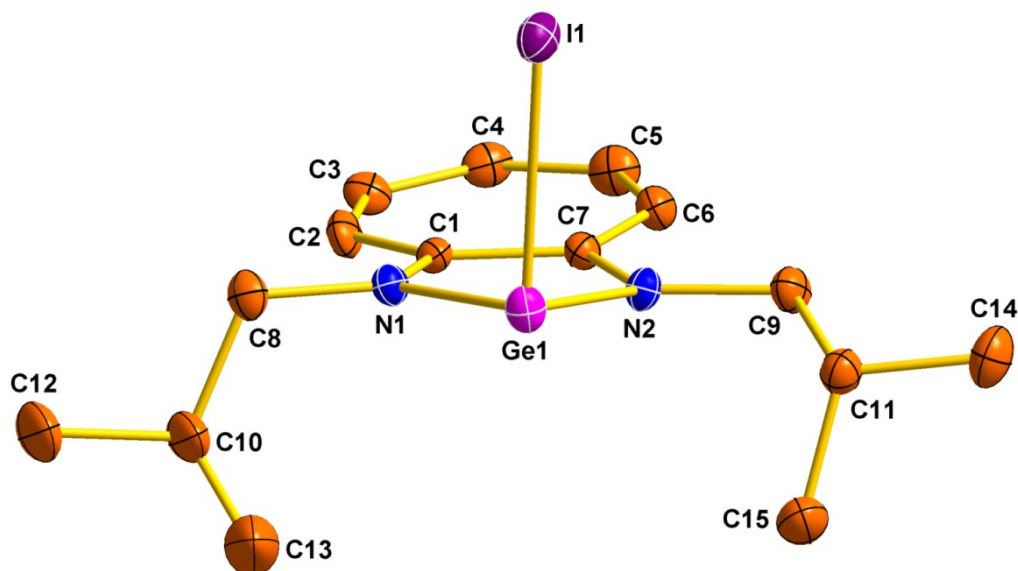

**Figure S2: Molecular structure of compound 7.** Thermal ellipsoids are shown at the 30% probability level and hydrogen atoms are omitted for clarity. Selected bond lengths (Å) and angles (deg): Ge1-I1 2.795(1), Ge1-N1 1.939(5), Ge1-N2 1.948(5); N1-Ge1-N2 80.70(2), N1-Ge1-I1 96.97(2), N2-Ge1-I1 96.20(2), C1-N1-Ge1 117.10(4), C7-N2-Ge1 115.90(4).

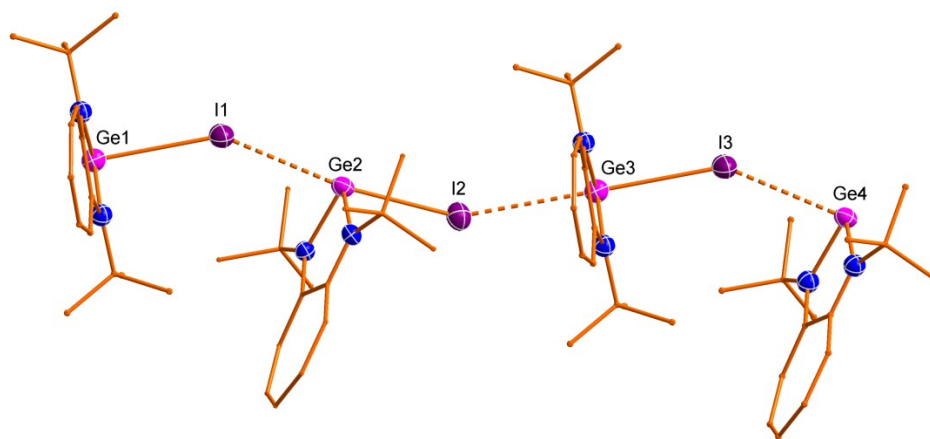

**Figure S3: Intermolecular interactions in compound 6.** Selected bond lengths (Å) and angles (deg): Ge2...I1 3.406(7); Ge1-I1-Ge2 142.77(2), I1-Ge2-I2 171.84(2).

# $^1\text{H}$ NMR spectra for the entries in Table 1

Entry 1

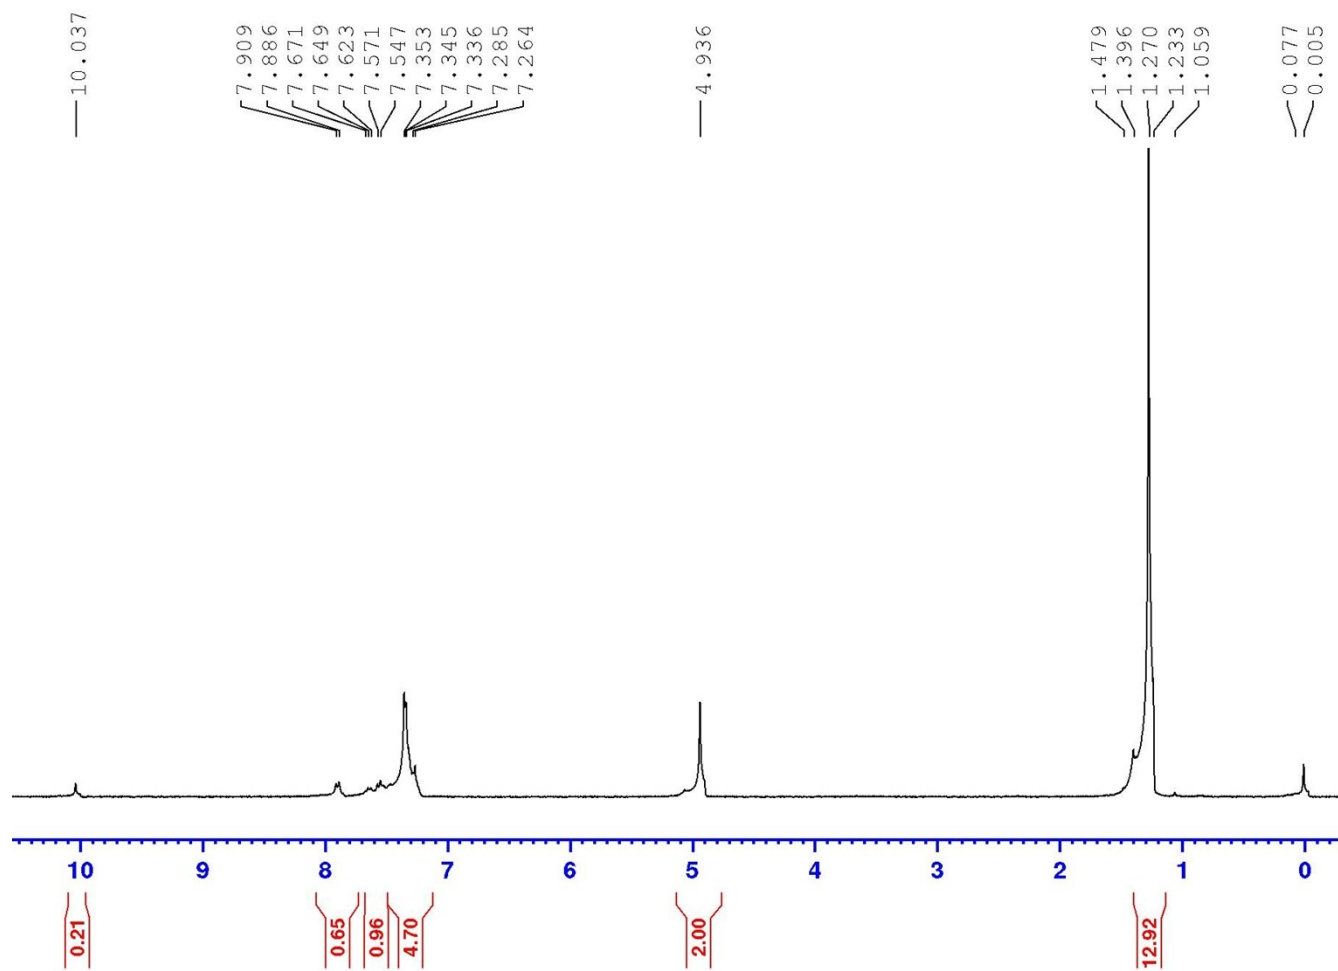

# Entry 3

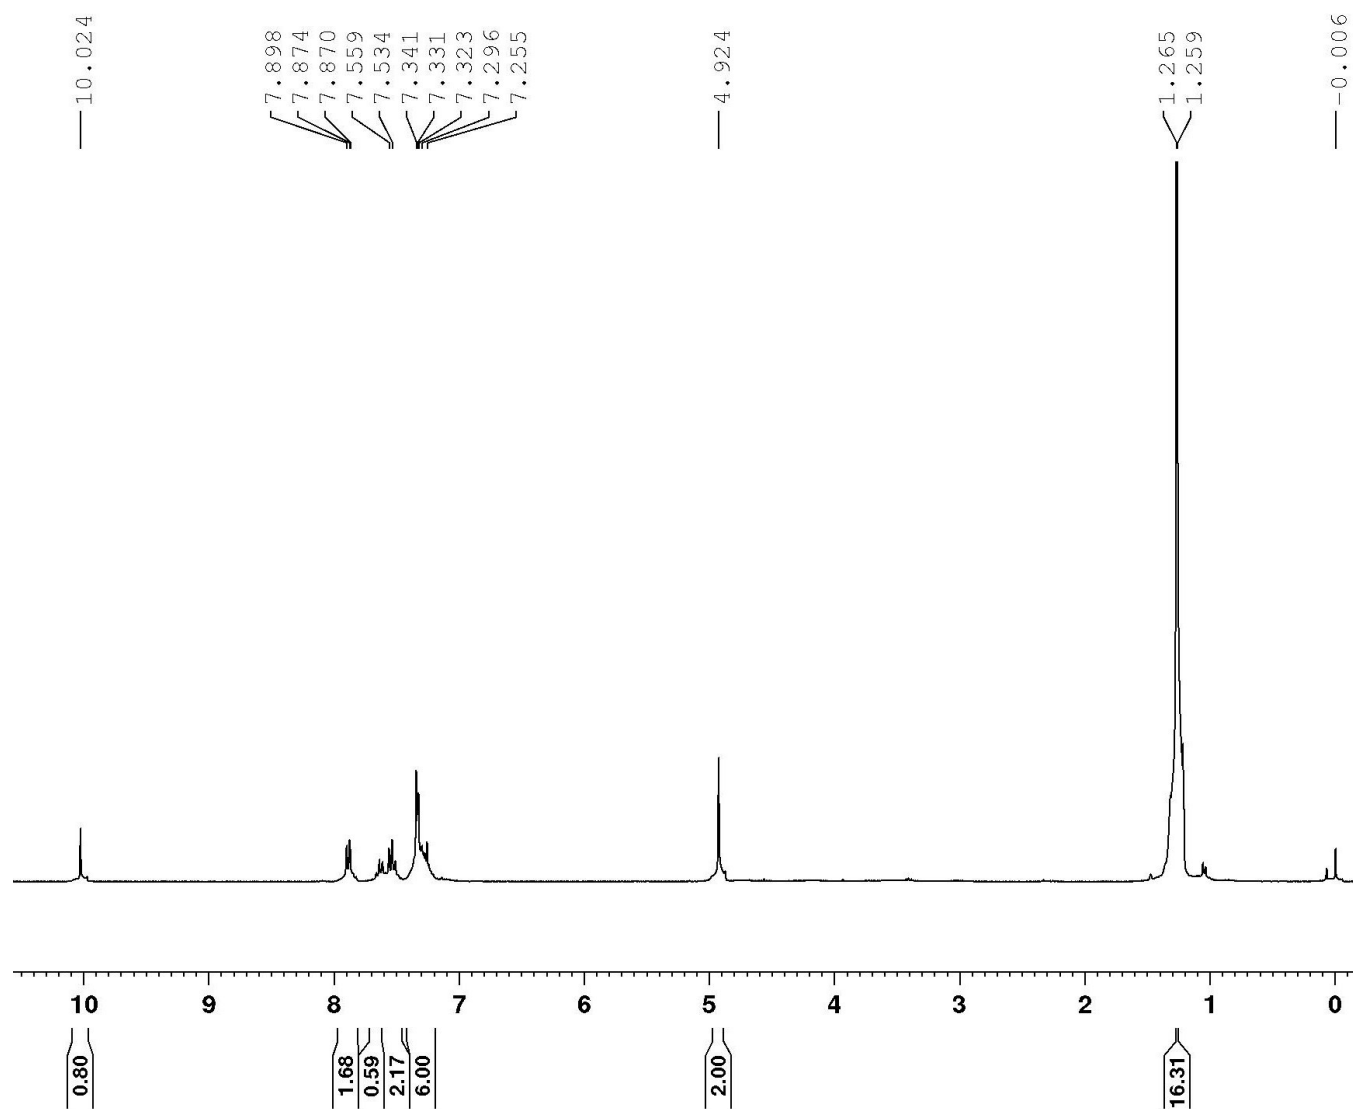

# Entry 4

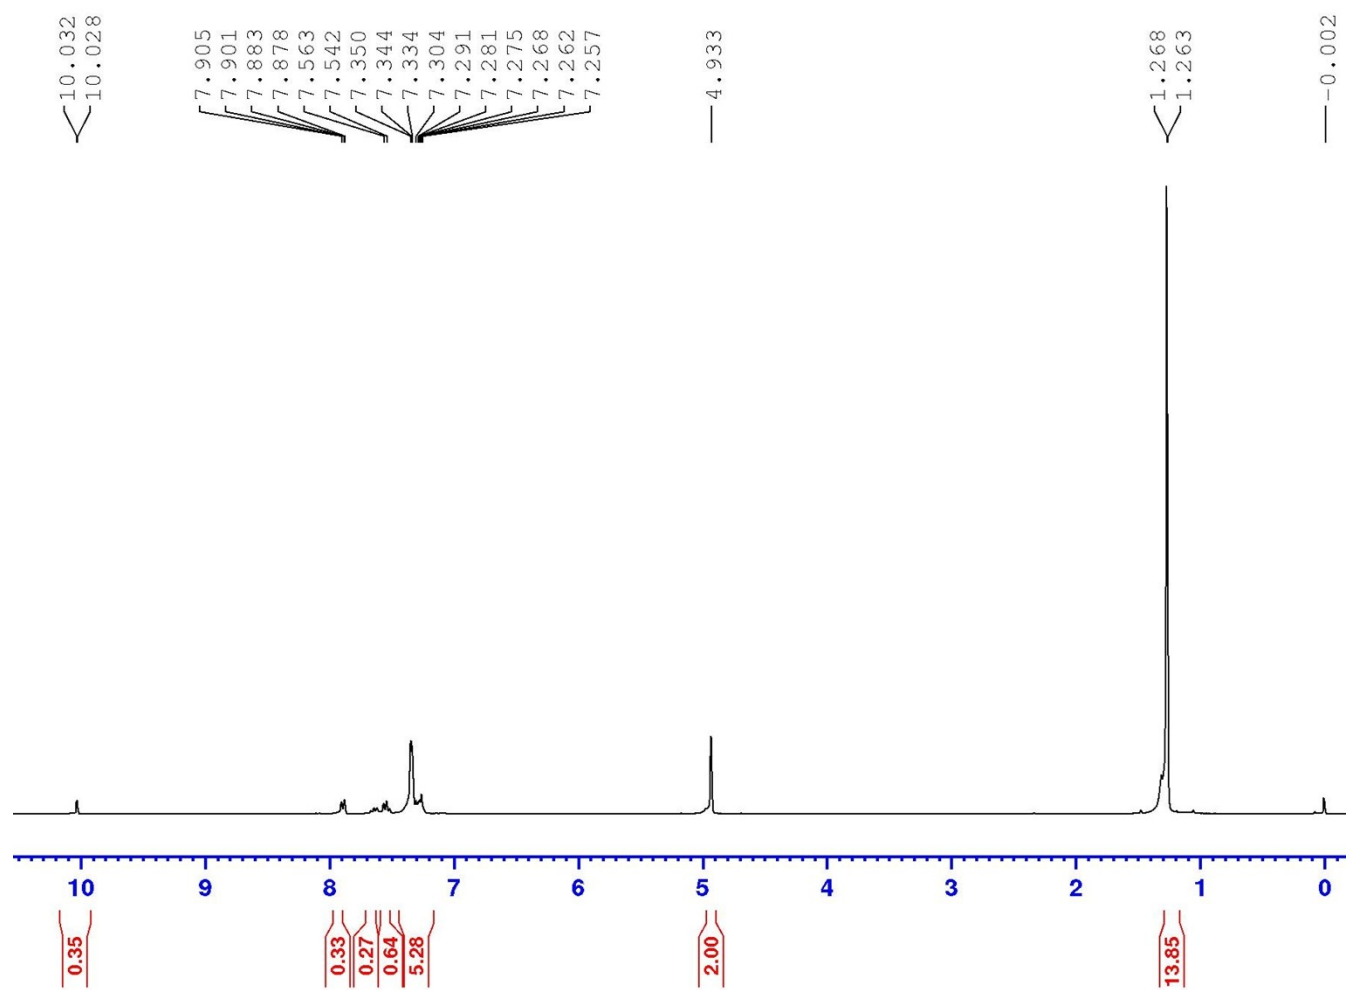



Entry 5

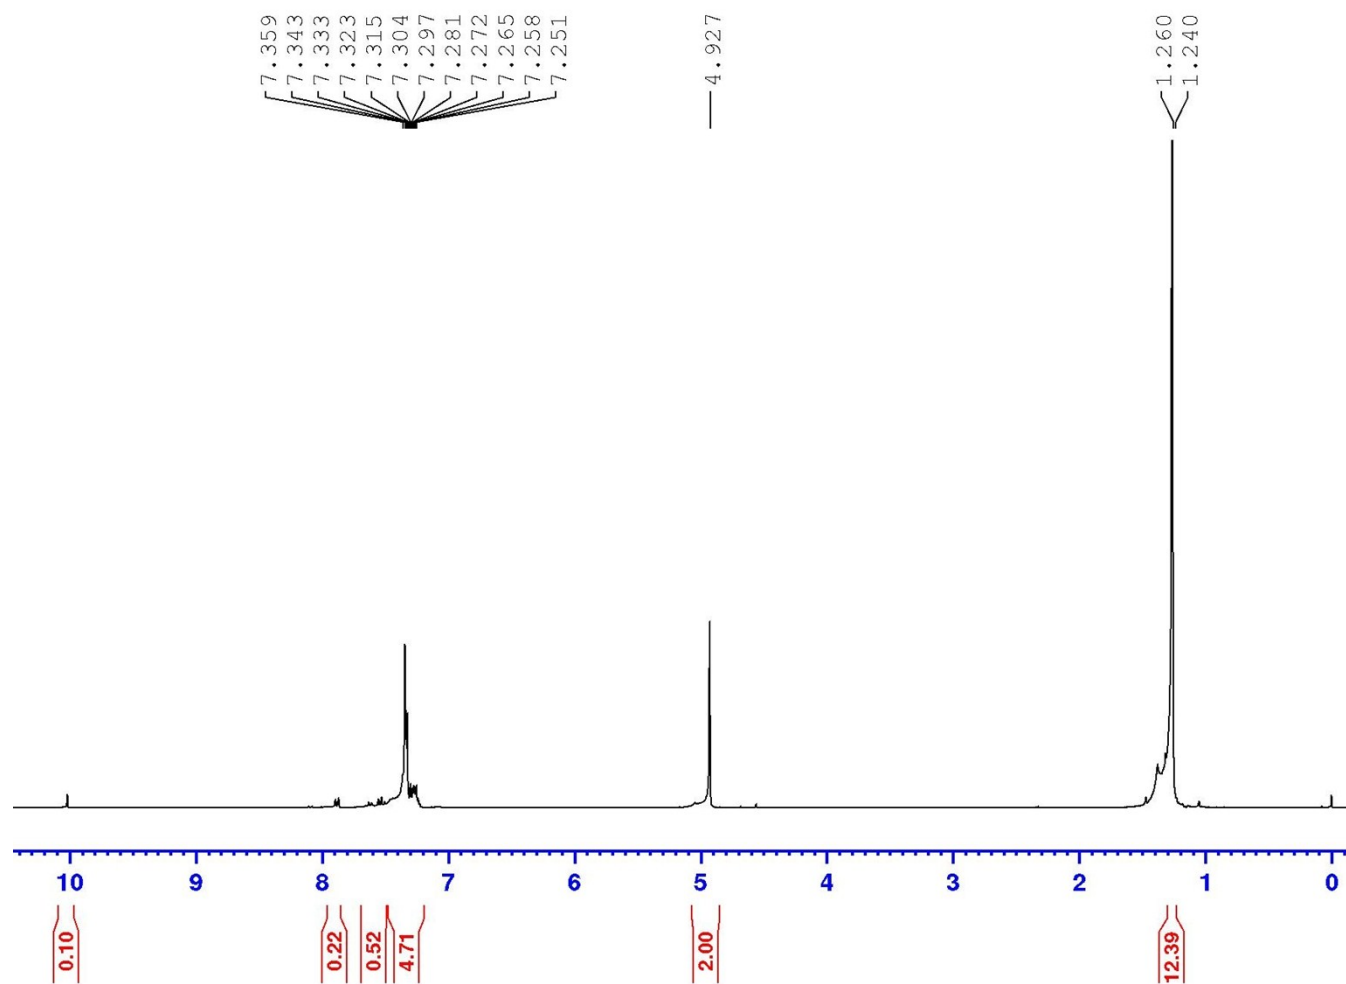

## NMR data for the hydroborylated products in Table 2

**<sup>n</sup>PrOBpin:** Hydroborylated product of propionaldehyde

<sup>1</sup>H NMR (400 MHz, CDCl<sub>3</sub>):  $\delta$  0.78 (t,  $^3J_{\text{HH}} = 8$  Hz, 3H, CH<sub>2</sub>CH<sub>3</sub>), 1.11 (s, 12H, Bpin-CH<sub>3</sub>), 1.42-1.47 (m, 2H, CH<sub>2</sub>CH<sub>3</sub>), 3.66 (t,  $^3J_{\text{HH}} = 6.4$  Hz, 2H, OCH<sub>2</sub>); <sup>13</sup>C{<sup>1</sup>H} NMR (100 MHz, CDCl<sub>3</sub>):  $\delta$  9.92 (OCH<sub>2</sub>CH<sub>2</sub>CH<sub>3</sub>), 24.43 (Bpin-CH<sub>3</sub>), 24.73 (OCH<sub>2</sub>CH<sub>2</sub>CH<sub>3</sub>), 66.33 (OCH<sub>2</sub>CH<sub>2</sub>CH<sub>3</sub>), 82.35 (Bpin-C).

**<sup>n</sup>BuOBpin:** Hydroborylated product of butyraldehyde

<sup>1</sup>H NMR (400 MHz, CDCl<sub>3</sub>):  $\delta$  0.79 (t,  $^3J_{\text{HH}} = 7.2$  Hz, 3H, CH<sub>2</sub>CH<sub>2</sub>CH<sub>3</sub>), 1.12 (s, 12H, Bpin-CH<sub>3</sub>), 1.22-1.27 (m, 2H, CH<sub>2</sub>CH<sub>2</sub>CH<sub>3</sub>), 1.40-1.43 (m, 2H, CH<sub>2</sub>CH<sub>2</sub>CH<sub>3</sub>), 3.69 (t,  $^3J_{\text{HH}} = 6.4$  Hz, 2H, OCH<sub>2</sub>); <sup>13</sup>C{<sup>1</sup>H} NMR (100 MHz, CDCl<sub>3</sub>):  $\delta$  13.59 (OCH<sub>2</sub>CH<sub>2</sub>CH<sub>2</sub>CH<sub>3</sub>), 18.65 (OCH<sub>2</sub>CH<sub>2</sub>CH<sub>2</sub>CH<sub>3</sub>), 24.45 (Bpin-CH<sub>3</sub>), 33.45 (OCH<sub>2</sub>CH<sub>2</sub>CH<sub>2</sub>CH<sub>3</sub>), 64.45 (OCH<sub>2</sub>CH<sub>2</sub>CH<sub>2</sub>CH<sub>3</sub>), 82.37 (Bpin-C).

**C<sub>6</sub>H<sub>5</sub>CH<sub>2</sub>OBpin:** Hydroborylated product of benzaldehyde

<sup>1</sup>H NMR (400 MHz, CDCl<sub>3</sub>):  $\delta$  1.24 (s, 12H, Bpin-CH<sub>3</sub>), 4.92 (s, 2H, OCH<sub>2</sub>), 7.23-7.32 (m, 5H, Ar-H); <sup>13</sup>C{<sup>1</sup>H} NMR (100 MHz, CDCl<sub>3</sub>):  $\delta$  24.63 (Bpin-CH<sub>3</sub>), 66.69 (OCH<sub>2</sub>), 82.94 (Bpin-C), 126.74, 127.38, 128.29, 139.28 (Ar-C).

**2-NO<sub>2</sub>PhOBpin:** Hydroborylated product of 2-nitrobenzaldehyde

<sup>1</sup>H NMR (400 MHz, CDCl<sub>3</sub>):  $\delta$  1.29 (s, 12H, Bpin-CH<sub>3</sub>), 5.36 (s, 2H, OCH<sub>2</sub>), 7.45 (t,  $^3J_{\text{HH}} = 8$  Hz, 1H, Ar-H), 7.68 (t,  $^3J_{\text{HH}} = 8$  Hz, 1H, Ar-H), 7.86 (d,  $^3J_{\text{HH}} = 8$  Hz, 1H, Ar-H), 8.13 (d,  $^3J_{\text{HH}} = 8$  Hz, 1H, Ar-H); <sup>13</sup>C{<sup>1</sup>H} NMR (100 MHz, CDCl<sub>3</sub>):  $\delta$  24.71 (Bpin-CH<sub>3</sub>), 63.92 (OCH<sub>2</sub>), 83.44 (Bpin-C), 124.83, 127.89, 127.95, 134.03, 136.21 (Ar-C).

**3-NO<sub>2</sub>PhOBpin:** Hydroborylated product of 3-nitrobenzaldehyde

<sup>1</sup>H NMR (400 MHz, CDCl<sub>3</sub>):  $\delta$  1.27 (s, 12H, Bpin-CH<sub>3</sub>), 5.00 (s, 2H, OCH<sub>2</sub>), 7.50 (t,  $^3J_{\text{HH}} = 8$  Hz, 1H, Ar-H), 7.67 (d,  $^3J_{\text{HH}} = 8$  Hz, 1H, Ar-H), 8.13 (d,  $^3J_{\text{HH}} = 7.2$  Hz, 1H, Ar-H), 8.23 (s, 1H, Ar-H); <sup>13</sup>C{<sup>1</sup>H} NMR (100 MHz, CDCl<sub>3</sub>):  $\delta$  24.57 (Bpin-CH<sub>3</sub>), 65.50 (OCH<sub>2</sub>), 83.31 (Bpin-C), 121.51, 122.34, 129.28, 132.59, 141.36 (Ar-C).

**4-ClPhCH<sub>2</sub>OBpin:** Hydroborylated product of 4-chlorobenzaldehyde

<sup>1</sup>H NMR (400 MHz, CDCl<sub>3</sub>):  $\delta$  1.25 (s, 12H, Bpin-CH<sub>3</sub>), 4.87 (s, 2H, OCH<sub>2</sub>), 7.27 (bs, 4H, Ar-H); <sup>13</sup>C{<sup>1</sup>H} NMR (100 MHz, CDCl<sub>3</sub>):  $\delta$  24.93 (Bpin-CH<sub>3</sub>), 65.99 (OCH<sub>2</sub>), 83.12 (Bpin-C), 128.17, 128.47, 133.16, 137.82 (Ar-C).

**4-BrPhCH<sub>2</sub>OBpin:** Hydroborylated product of 4-bromobenzaldehyde

<sup>1</sup>H NMR (400 MHz, CDCl<sub>3</sub>):  $\delta$  1.26 (s, 12H, Bpin-CH<sub>3</sub>), 4.87 (s, 2H, OCH<sub>2</sub>), 7.22 (d, <sup>3</sup>J<sub>HH</sub> = 8 Hz, 2H, Ar-H), 7.45 (d, <sup>3</sup>J<sub>HH</sub> = 8 Hz, 2H, Ar-H); <sup>13</sup>C{<sup>1</sup>H} NMR (100 MHz, CDCl<sub>3</sub>):  $\delta$  24.67 (Bpin-CH<sub>3</sub>), 66.02 (OCH<sub>2</sub>), 83.13 (Bpin-C), 121.26, 128.48, 131.43, 138.33 (Ar-C).

**4-MePhCH<sub>2</sub>OBpin:** Hydroborylated product of 4-methylbenzaldehyde

<sup>1</sup>H NMR (400 MHz, CDCl<sub>3</sub>):  $\delta$  1.26 (s, 12H, Bpin-CH<sub>3</sub>), 2.33 (s, 3H, CH<sub>3</sub>), 4.88 (s, 2H, OCH<sub>2</sub>), 7.13 (d, <sup>3</sup>J<sub>HH</sub> = 8 Hz, 2H, Ar-H), 7.24 (d, <sup>3</sup>J<sub>HH</sub> = 8 Hz, 2H, Ar-H); <sup>13</sup>C{<sup>1</sup>H} NMR (100 MHz, CDCl<sub>3</sub>):  $\delta$  21.14 (CH<sub>3</sub>), 24.63 (Bpin-CH<sub>3</sub>), 66.60 (OCH<sub>2</sub>), 82.91 (Bpin-C), 126.87, 128.96, 136.27, 136.97 (Ar-C).

**4-MeOPhCH<sub>2</sub>OBpin:** Hydroborylated product of 4-methoxybenzaldehyde

<sup>1</sup>H NMR (400 MHz, CDCl<sub>3</sub>):  $\delta$  1.25 (s, 12H, Bpin-CH<sub>3</sub>), 3.78 (s, 3H, OCH<sub>3</sub>), 4.84 (s, 2H, OCH<sub>2</sub>), 6.85 (d, <sup>3</sup>J<sub>HH</sub> = 8 Hz, 2H, Ar-H), 7.27 (d, <sup>3</sup>J<sub>HH</sub> = 8 Hz, 2H, Ar-H); <sup>13</sup>C{<sup>1</sup>H} NMR (100 MHz, CDCl<sub>3</sub>):  $\delta$  24.66 (Bpin-CH<sub>3</sub>), 55.28 (OCH<sub>3</sub>), 66.49 (OCH<sub>2</sub>), 82.94 (Bpin-C), 113.73, , 128.57, 131.52, 159.10 (Ar-C).

**2,4,6-(CH<sub>3</sub>)<sub>3</sub>PhCH<sub>2</sub>OBpin:** Hydroborylated product of mesitaldehyde

<sup>1</sup>H NMR (400 MHz, CDCl<sub>3</sub>):  $\delta$  1.21 (s, 12H, Bpin-CH<sub>3</sub>), 2.21 (s, 3H, CH<sub>3</sub>), 2.34 (s, 6H, CH<sub>3</sub>), 4.92 (s, 2H, OCH<sub>2</sub>), 6.79 (s, 2H, Ar-H); <sup>13</sup>C{<sup>1</sup>H} NMR (100 MHz, CDCl<sub>3</sub>):  $\delta$  19.40 (CH<sub>3</sub>), 20.94 (CH<sub>3</sub>), 24.61 (Bpin-CH<sub>3</sub>), 61.17 (OCH<sub>2</sub>), 82.70 (Bpin-C), 128.88, 132.19, 137.48, 137.66 (Ar-C).

**(CH<sub>3</sub>)<sub>2</sub>CHOBpin:** Hydroborylated product of acetone

<sup>1</sup>H NMR (400 MHz, CDCl<sub>3</sub>):  $\delta$  1.18 (d, <sup>3</sup>J<sub>HH</sub> = 6 Hz, 6H, (CH<sub>3</sub>)<sub>2</sub>), 1.22 (s, 12H, Bpin-CH<sub>3</sub>), 4.29-4.32 (m, 1H, CH(CH<sub>3</sub>)<sub>2</sub>); <sup>13</sup>C{<sup>1</sup>H} NMR (100 MHz, CDCl<sub>3</sub>):  $\delta$  24.69 ((CH<sub>3</sub>)<sub>2</sub>), 25.01 (Bpin-CH<sub>3</sub>), 67.43 (CH(CH<sub>3</sub>)<sub>2</sub>), 82.55 (Bpin-C).

**(CH<sub>3</sub>CH<sub>2</sub>CH<sub>2</sub>)(CH<sub>3</sub>)CHOBpin:** Hydroborylated product of 2-pentanone

<sup>1</sup>H NMR (400 MHz, CDCl<sub>3</sub>): δ 0.83 (t, <sup>3</sup>J<sub>HH</sub> = 8 Hz, 3H, CH<sub>2</sub>CH<sub>3</sub>), 1.11 (d, <sup>3</sup>J<sub>HH</sub> = 8 Hz, 3H, (CH<sub>3</sub>)), 1.18 (s, 12H, Bpin-CH<sub>3</sub>), 1.23-1.33 (m, 2H, (CH<sub>2</sub>)<sub>2</sub>CH<sub>3</sub>), 1.40-1.45 (m, 2H, (CH<sub>2</sub>)<sub>2</sub>CH<sub>3</sub>), 4.09-4.11 (m, 1H, CHCH<sub>3</sub>); <sup>13</sup>C{<sup>1</sup>H} NMR (100 MHz, CDCl<sub>3</sub>): δ 13.96 (CH<sub>2</sub>CH<sub>2</sub>CH<sub>3</sub>), 18.71 (CH<sub>2</sub>CH<sub>2</sub>CH<sub>3</sub>), 22.61 (CH<sub>2</sub>CH<sub>2</sub>CH<sub>3</sub>), 24.52 (Bpin-CH<sub>3</sub>), 24.58 (Bpin-CH<sub>3</sub>), 40.39 (CHCH<sub>3</sub>), 70.61 (OCHCH<sub>3</sub>), 82.37 (Bpin-C).

**(CH<sub>3</sub>)(Ph)CHOBpin:** Hydroborylated product of acetophenone

<sup>1</sup>H NMR (400 MHz, CDCl<sub>3</sub>): δ 1.18 (s, 6H, Bpin-CH<sub>3</sub>), 1.21 (s, 6H, Bpin-CH<sub>3</sub>), 1.47 (d, <sup>3</sup>J<sub>HH</sub> = 9 Hz, 3H, CH<sub>3</sub>), 5.21-5.23 (m, 1H, CH(CH<sub>3</sub>)<sub>2</sub>) 7.20-7.33 (m, 4H, Ar-H); <sup>13</sup>C{<sup>1</sup>H} NMR (100 MHz, CDCl<sub>3</sub>): δ 24.55 (Bpin-CH<sub>3</sub>), 24.60 (Bpin-CH<sub>3</sub>), 25.48 (CH<sub>3</sub>), 72.60 (CHCH<sub>3</sub>), 82.73 (Bpin-C), 125.36, 127.13, 128.22, 144.62 (Ar-C).

**(CH<sub>3</sub>)(4-FPh)CHOBpin:** Hydroborylated product of 4-fluoroacetophenone

<sup>1</sup>H NMR (400 MHz, CDCl<sub>3</sub>): δ 1.20 (s, 6H, Bpin-CH<sub>3</sub>), 1.23 (s, 6H, Bpin-CH<sub>3</sub>), 1.46 (d, <sup>3</sup>J<sub>HH</sub> = 6.6 Hz, 3H, CH<sub>3</sub>), 5.21-5.23 (m, 1H, CH(CH<sub>3</sub>)<sub>2</sub>) 6.98 (t, <sup>3</sup>J<sub>HH</sub> = 8 Hz, 2H, Ar-H), 7.31-7.33 (m, 2H, Ar-H); <sup>13</sup>C{<sup>1</sup>H} NMR (100 MHz, CDCl<sub>3</sub>): δ 24.53 (Bpin-CH<sub>3</sub>), 24.59 (Bpin-CH<sub>3</sub>), 25.43 (CH<sub>3</sub>), 72.04 (CHCH<sub>3</sub>), 82.83 (Bpin-C), 114.87, 115.08, 127.04, 127.12, 140.43, 160.78, 163.21 (Ar-C).

**(CH<sub>3</sub>)(4-ClPh)CHOBpin:** Hydroborylated product of 4-chloroacetophenone

<sup>1</sup>H NMR (400 MHz, CDCl<sub>3</sub>): δ 1.20 (s, 6H, Bpin-CH<sub>3</sub>), 1.23 (s, 6H, Bpin-CH<sub>3</sub>), 1.45 (d, <sup>3</sup>J<sub>HH</sub> = 6.4 Hz, 3H, CH<sub>3</sub>), 5.17-5.22 (m, 1H, CH(CH<sub>3</sub>)<sub>2</sub>) 7.28 (s, 4H, Ar-H); <sup>13</sup>C{<sup>1</sup>H} NMR (100 MHz, CDCl<sub>3</sub>): δ 24.65 (Bpin-CH<sub>3</sub>), 24.70 (Bpin-CH<sub>3</sub>), 25.50 (CH<sub>3</sub>), 72.10 (CHCH<sub>3</sub>), 83.01 (Bpin-C), 126.92, 128.47, 132.89, 143.24 (Ar-C).

**(CH<sub>3</sub>)(4-MePh)CHOBpin:** Hydroborylated product of 4-methylacetophenone

<sup>1</sup>H NMR (400 MHz, CDCl<sub>3</sub>): δ 1.20 (s, 6H, Bpin-CH<sub>3</sub>), 1.22 (s, 6H, Bpin-CH<sub>3</sub>), 1.46 (d, <sup>3</sup>J<sub>HH</sub> = 6.4 Hz, 3H, CH<sub>3</sub>), 5.20-5.22 (m, 1H, CH(CH<sub>3</sub>)<sub>2</sub>) 7.11 (d, <sup>3</sup>J<sub>HH</sub> = 8 Hz, 2H, Ar-H), 7.24 (d, <sup>3</sup>J<sub>HH</sub> = 8 Hz, 2H, Ar-H); <sup>13</sup>C{<sup>1</sup>H} NMR (100 MHz, CDCl<sub>3</sub>): δ 21.12 (CH<sub>3</sub>), 24.59 (Bpin-CH<sub>3</sub>), 24.62 (Bpin-CH<sub>3</sub>), 25.49 (CH<sub>3</sub>), 72.48 (CHCH<sub>3</sub>), 82.71 (Bpin-C), 125.35, 128.90, 136.66, 141.71 (Ar-C).

**(C<sub>6</sub>H<sub>5</sub>)<sub>2</sub>CHOBpin:** Hydroborylated product of Benzophenone

<sup>1</sup>H NMR (400 MHz, CDCl<sub>3</sub>): δ 1.18 (s, 12H, Bpin-CH<sub>3</sub>), 6.16 (s, 1H, CH(CH<sub>3</sub>)<sub>2</sub>) 7.21 (d, <sup>3</sup>J<sub>HH</sub> = 8 Hz, 2H, Ar-*H*), 7.28 (t, <sup>3</sup>J<sub>HH</sub> = 8 Hz, 4H, Ar-*H*), 7.37 (d, <sup>3</sup>J<sub>HH</sub> = 8 Hz, 4H, Ar-*H*); <sup>13</sup>C{<sup>1</sup>H} NMR (100 MHz, CDCl<sub>3</sub>): δ 24.61 (Bpin-CH<sub>3</sub>), 77.99 (CHCH<sub>3</sub>), 83.07 (Bpin-C), 126.58, 127.37, 128.31, 143.20 (Ar-C).

### **<sup>1</sup>H and <sup>13</sup>C NMR spectra of the hydroborylated products in Table 2\***

*\*In the <sup>1</sup>H NMR spectra of hydroborylated aldehydes, the peak for the methyl protons of pinacolborane (which was used in slight excess) is overlapping with the peak due to the methyl protons of the OBpin moiety of the hydroborylated aldehyde. Therefore, the integration for the latter is greater than the expected value of 12.*

<sup>1</sup>H NMR spectrum of the hydroborylated product of propionaldehyde

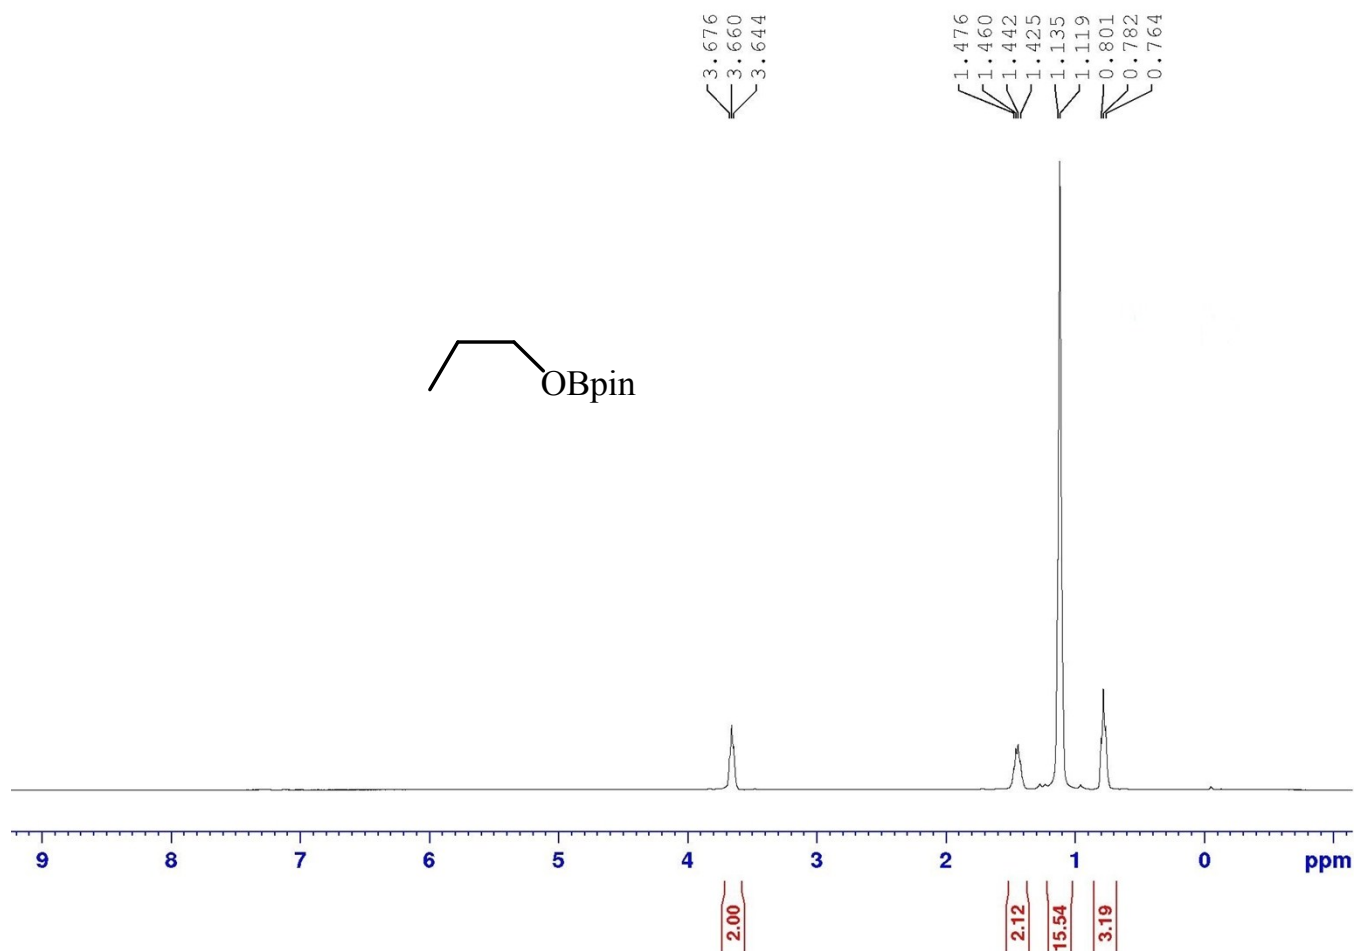

$^{13}\text{C}$  NMR spectrum of the hydroborylated product of propionaldehyde

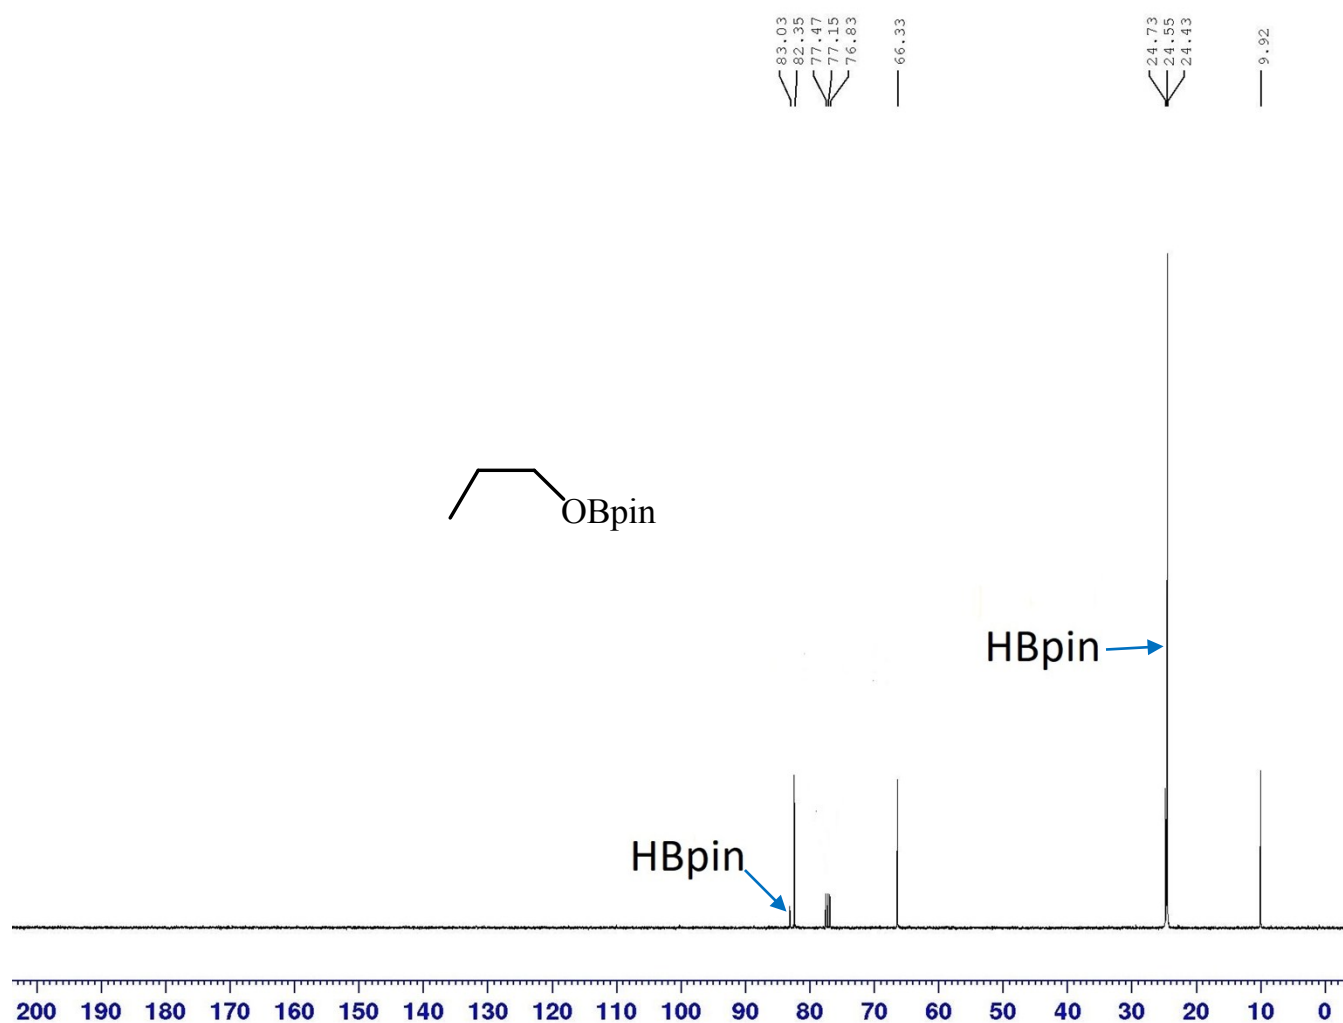

$^1\text{H}$  NMR spectrum of the hydroborylated product of *n*-butyraldehyde

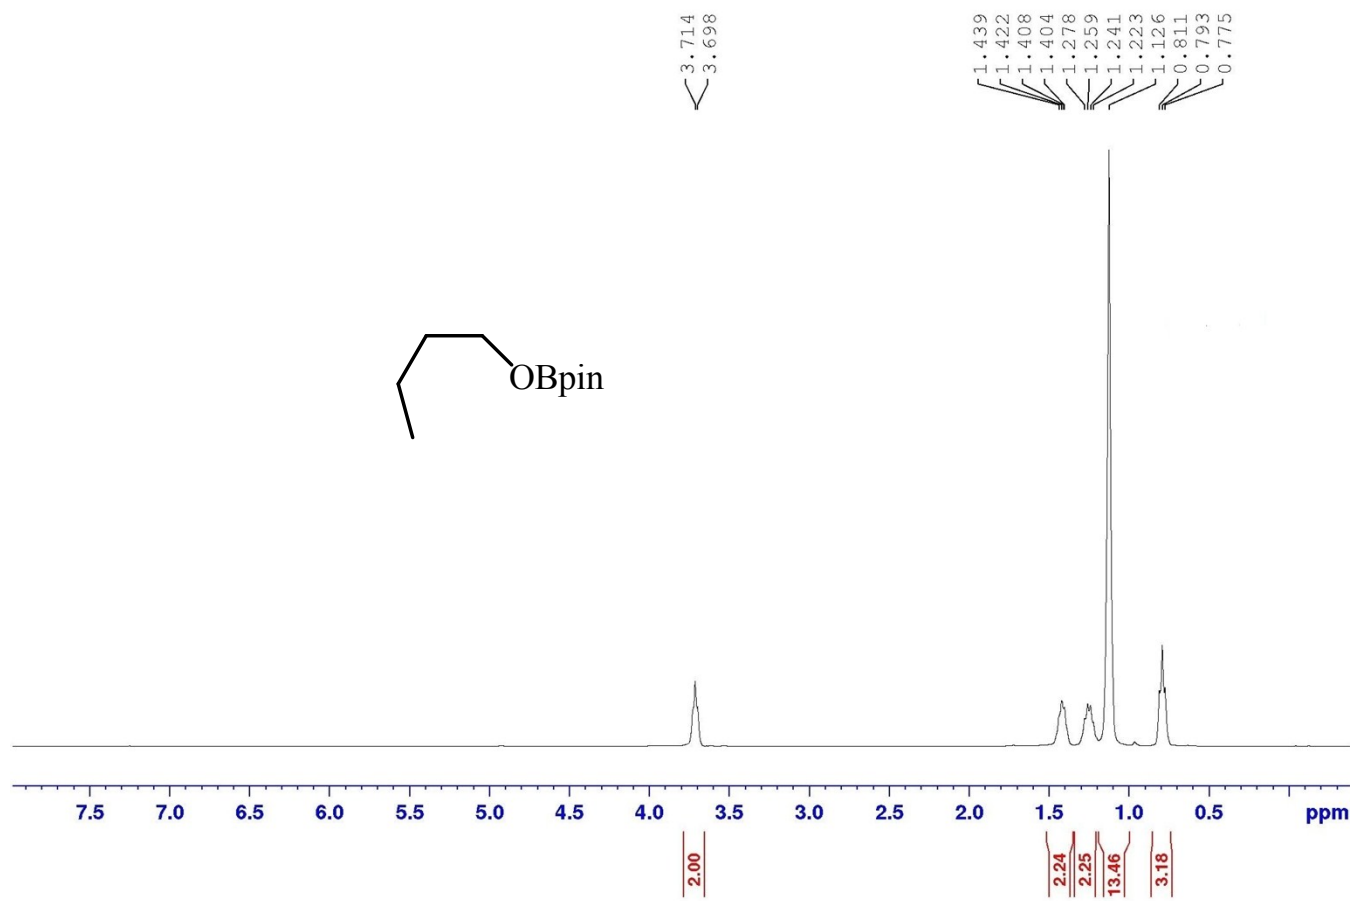



Chemical structure of 1-pentanol is shown above the spectrum.

Chemical shifts (ppm) are listed above the spectrum:

- 83.06
- 82.37
- 77.48
- 77.16
- 76.84
- 64.45
- 33.45
- 24.76
- 24.45
- 18.65
- 13.59

Two peaks are labeled "HBpin" with blue arrows pointing to them.

$^1\text{H}$  NMR spectrum of the hydroborylated product of benzaldehyde

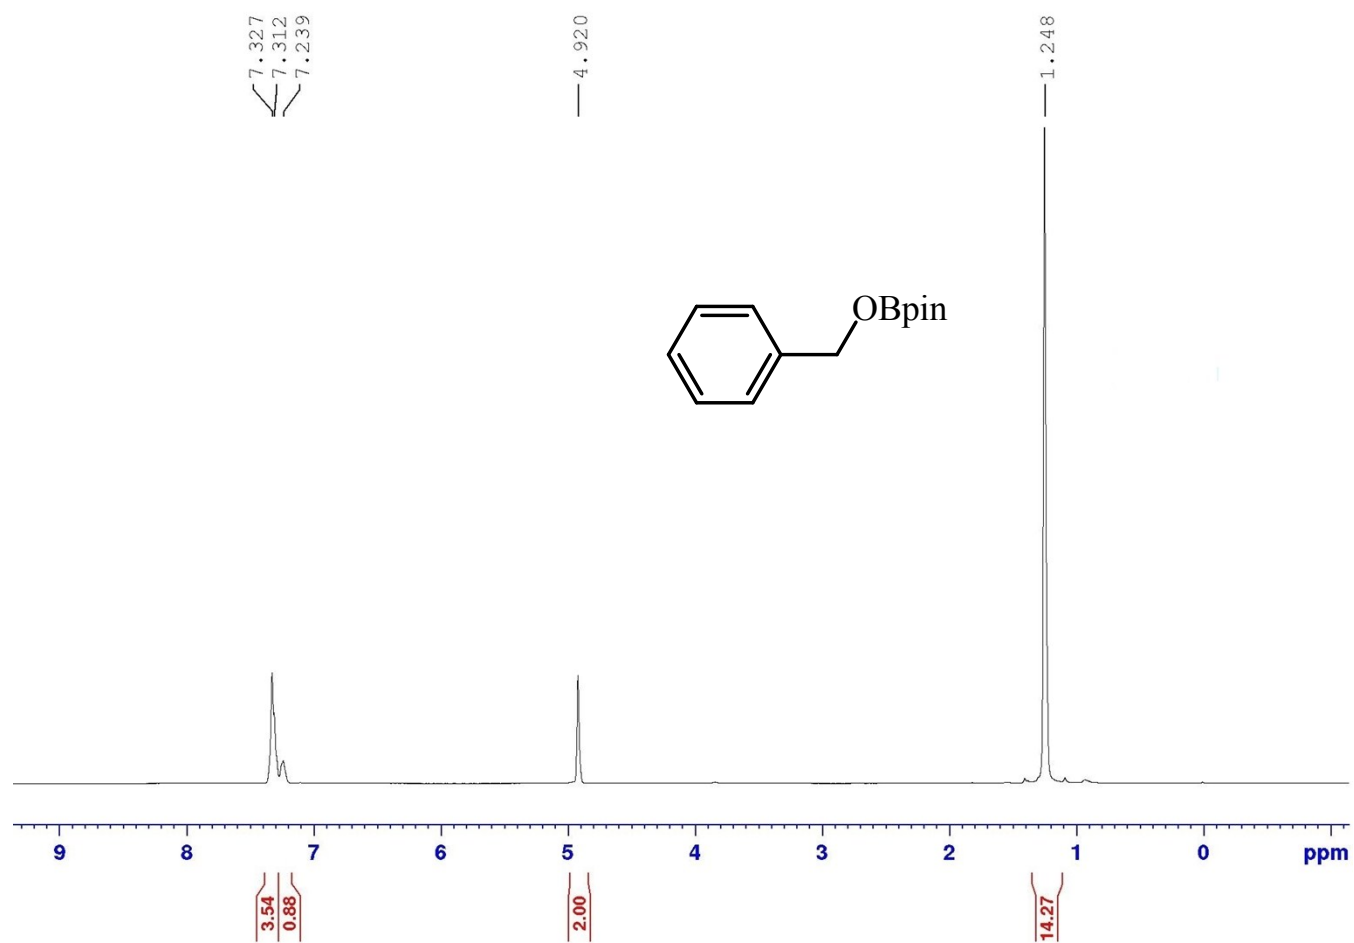

$^{13}\text{C}$  NMR spectrum of the hydroborylated product of benzaldehyde

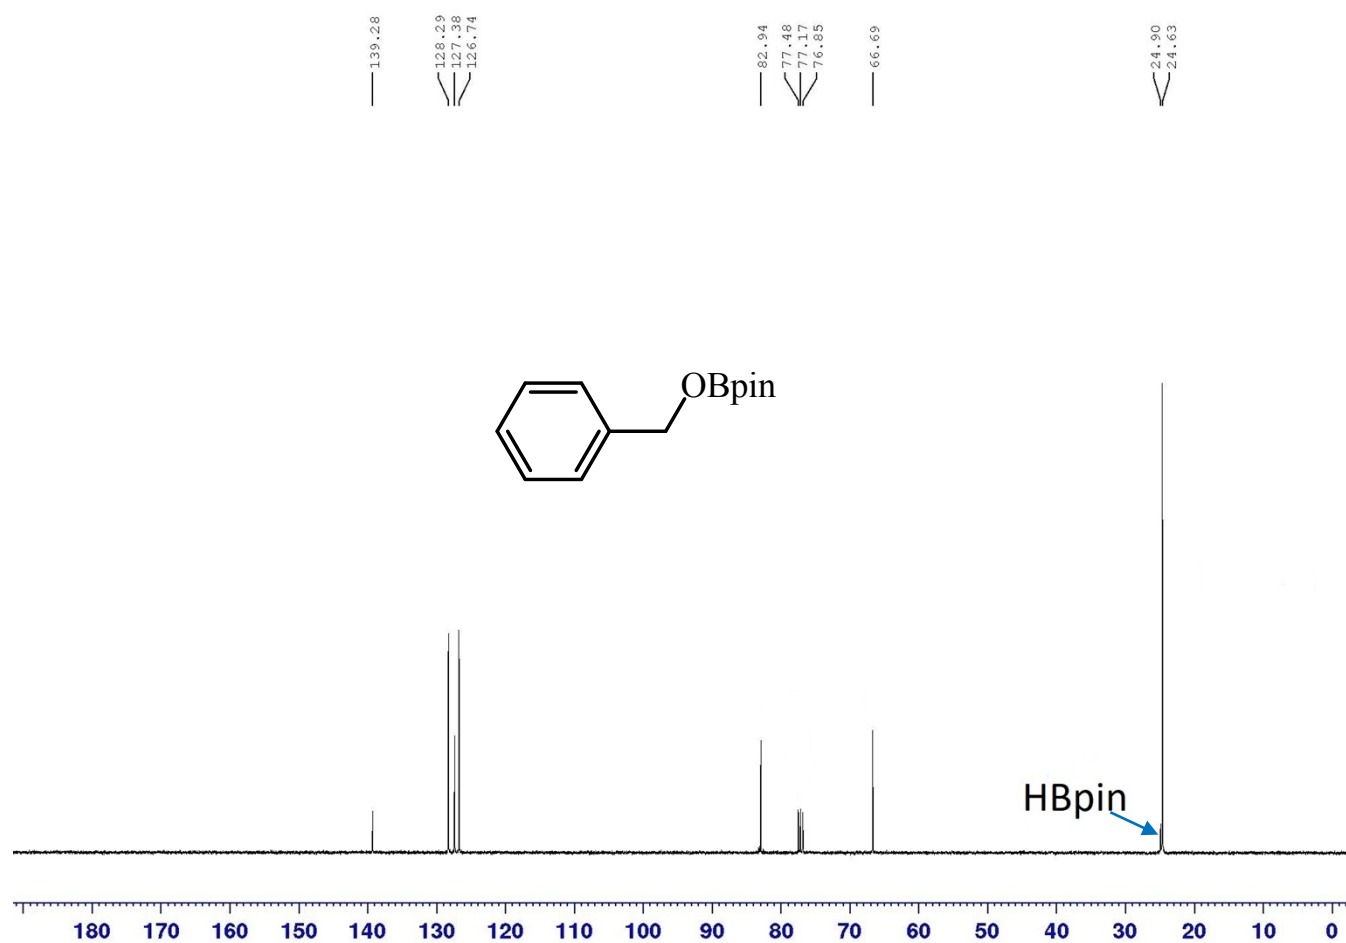

Chemical structure: O=[N+]([O-])c1ccccc1CBOC(C)(C)C(C)(C)C

<sup>1</sup>H NMR spectrum (CDCl<sub>3</sub>) data:

| Chemical Shift (ppm)                                          | Integration            |
|---------------------------------------------------------------|------------------------|
| 8.149, 8.129, 7.876, 7.857, 7.701, 7.682, 7.663, 7.474, 7.454 | 1.01, 1.00, 1.11, 1.08 |
| 5.364                                                         | 2.08                   |
| 1.295, 1.283, 1.264                                           | 11.76                  |
| 0.014                                                         | -                      |

$^{13}\text{C}$  NMR spectrum of the hydroborylated product of 2-nitrobenzaldehyde

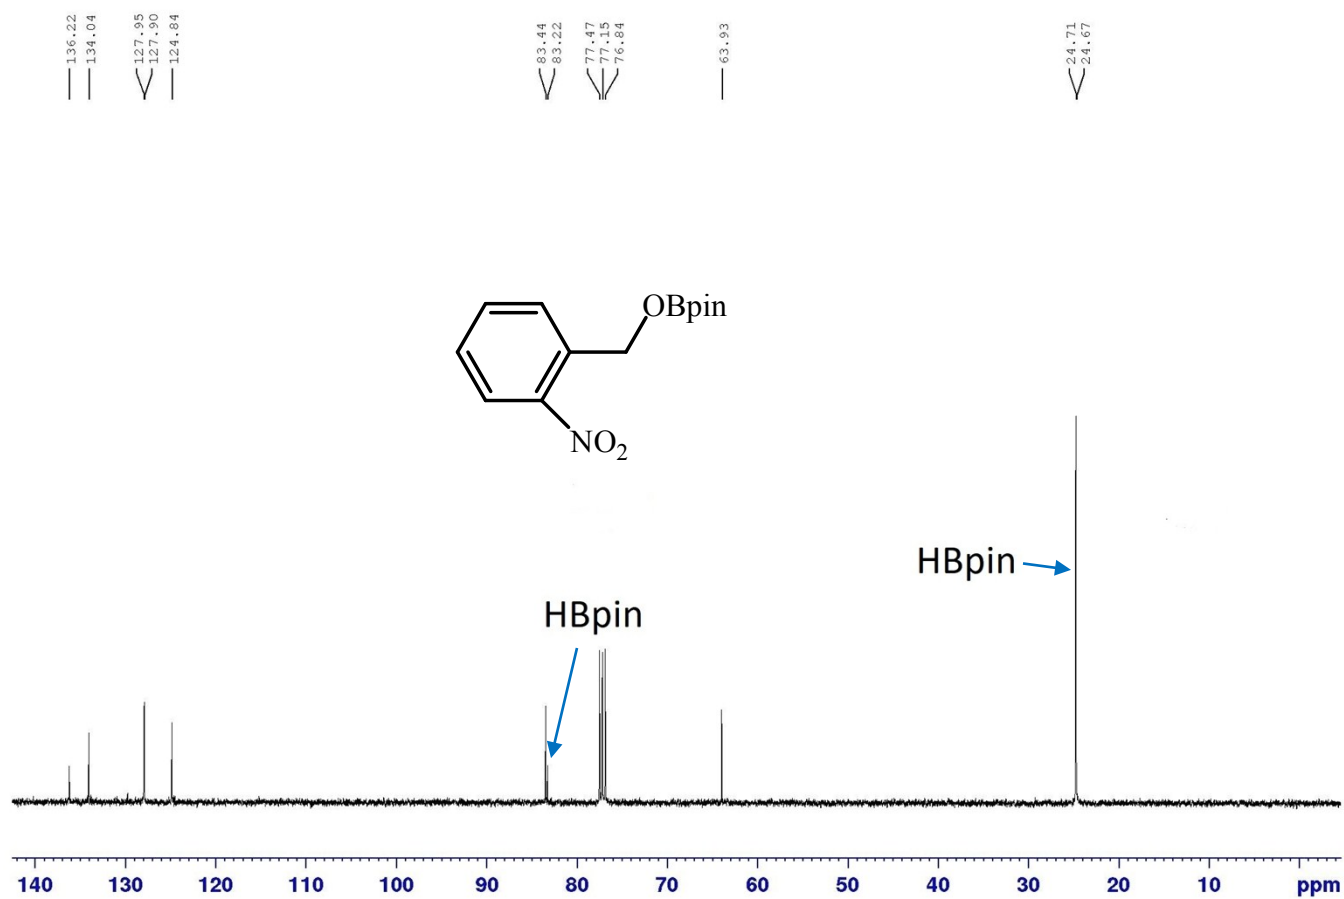

$^1\text{H}$  NMR spectrum of the hydroborylated product of 3-nitrobenzaldehyde

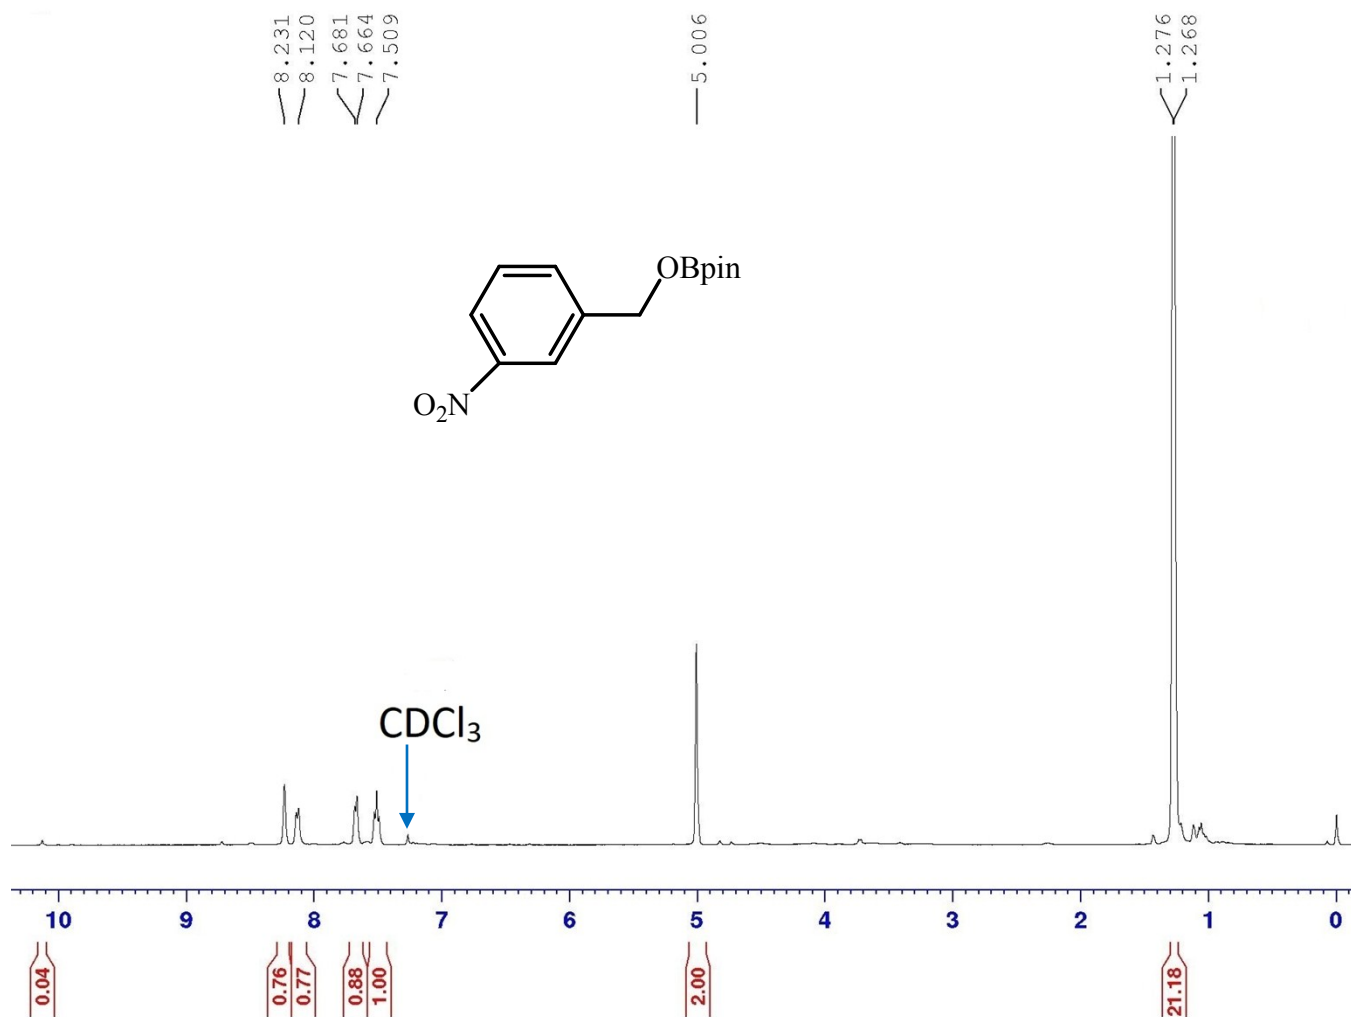

$^{13}\text{C}$  NMR spectrum of the hydroborylated product of 3-nitrobenzaldehyde

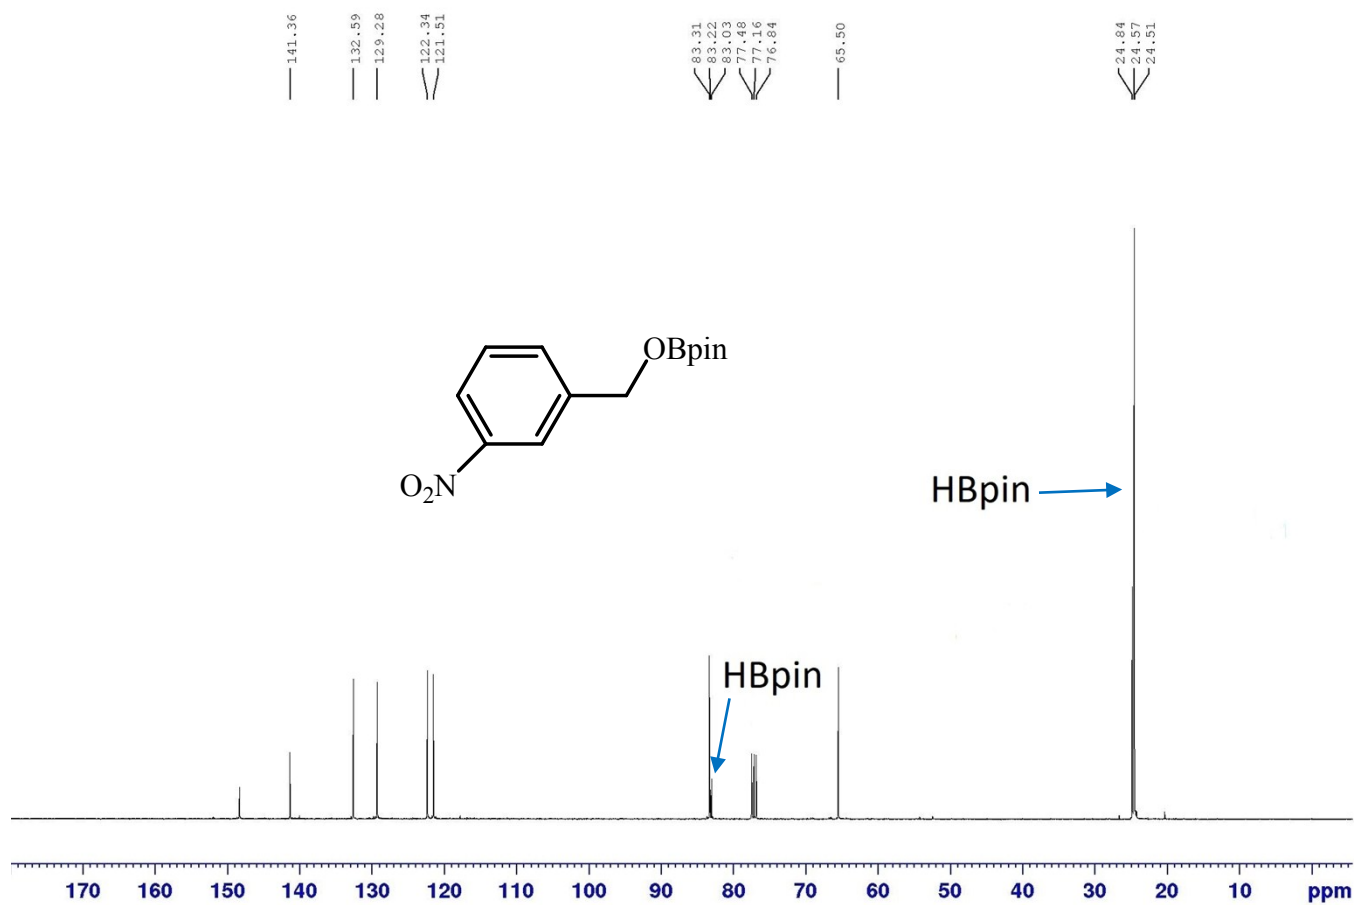

$^1\text{H}$  NMR spectrum of the hydroborylated product of 4-chlorobenzaldehyde

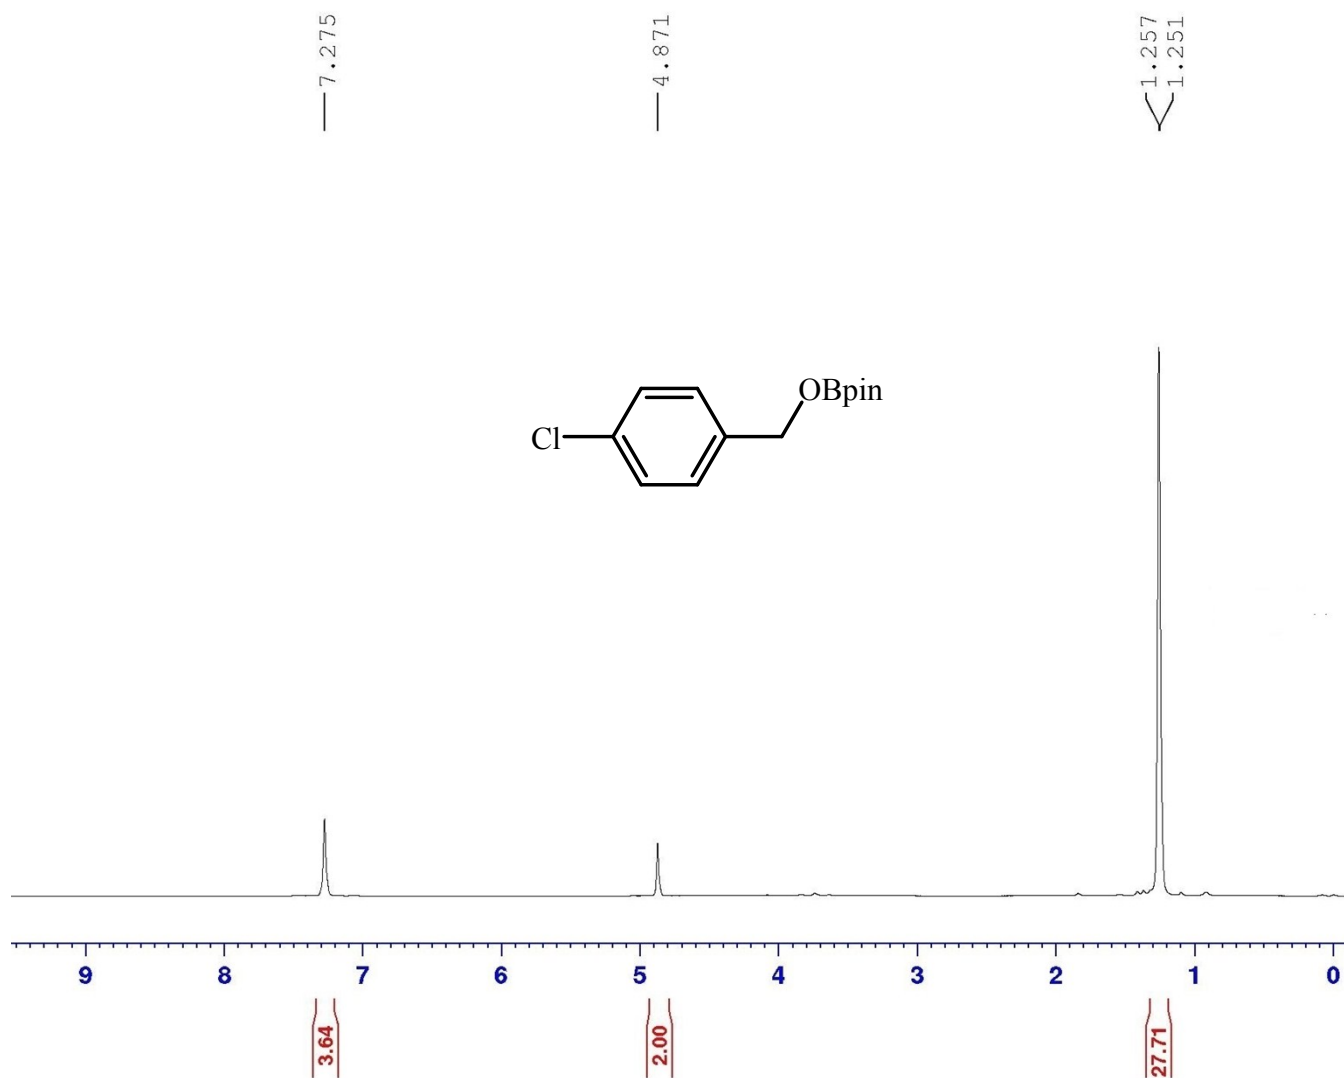



$^{13}\text{C}$  NMR spectrum of the hydroborylated product of 4-chlorobenzaldehyde

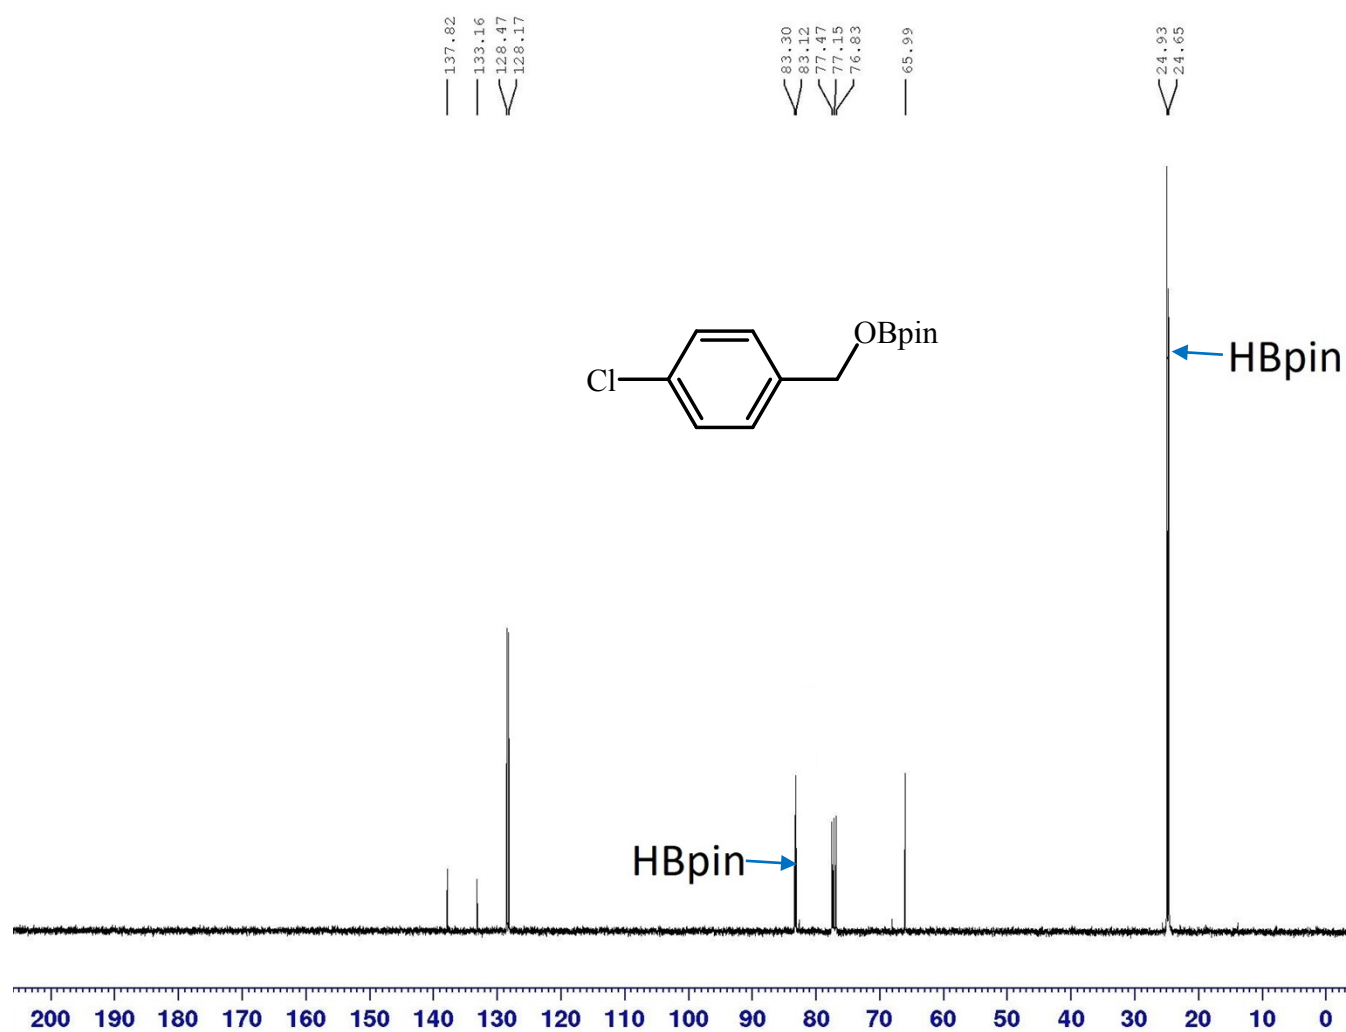

Chemical structure: BrC1=CC=C(C=C1)C2=CC=CC=C2OC3(C)(C)OC(C)(C)OC(C)(C)OC3(C)(C)C

<sup>1</sup>H NMR spectrum (CDCl<sub>3</sub>) data:

| Chemical Shift (ppm)       | Integration |
|----------------------------|-------------|
| 7.464, 7.445, 7.234, 7.215 | 1.81, 1.90  |
| 4.871                      | 2.00        |
| 1.266                      | 18.13       |

[illegible]

$^1\text{H}$  NMR spectrum of the hydroborylated product of 4-methylbenzaldehyde

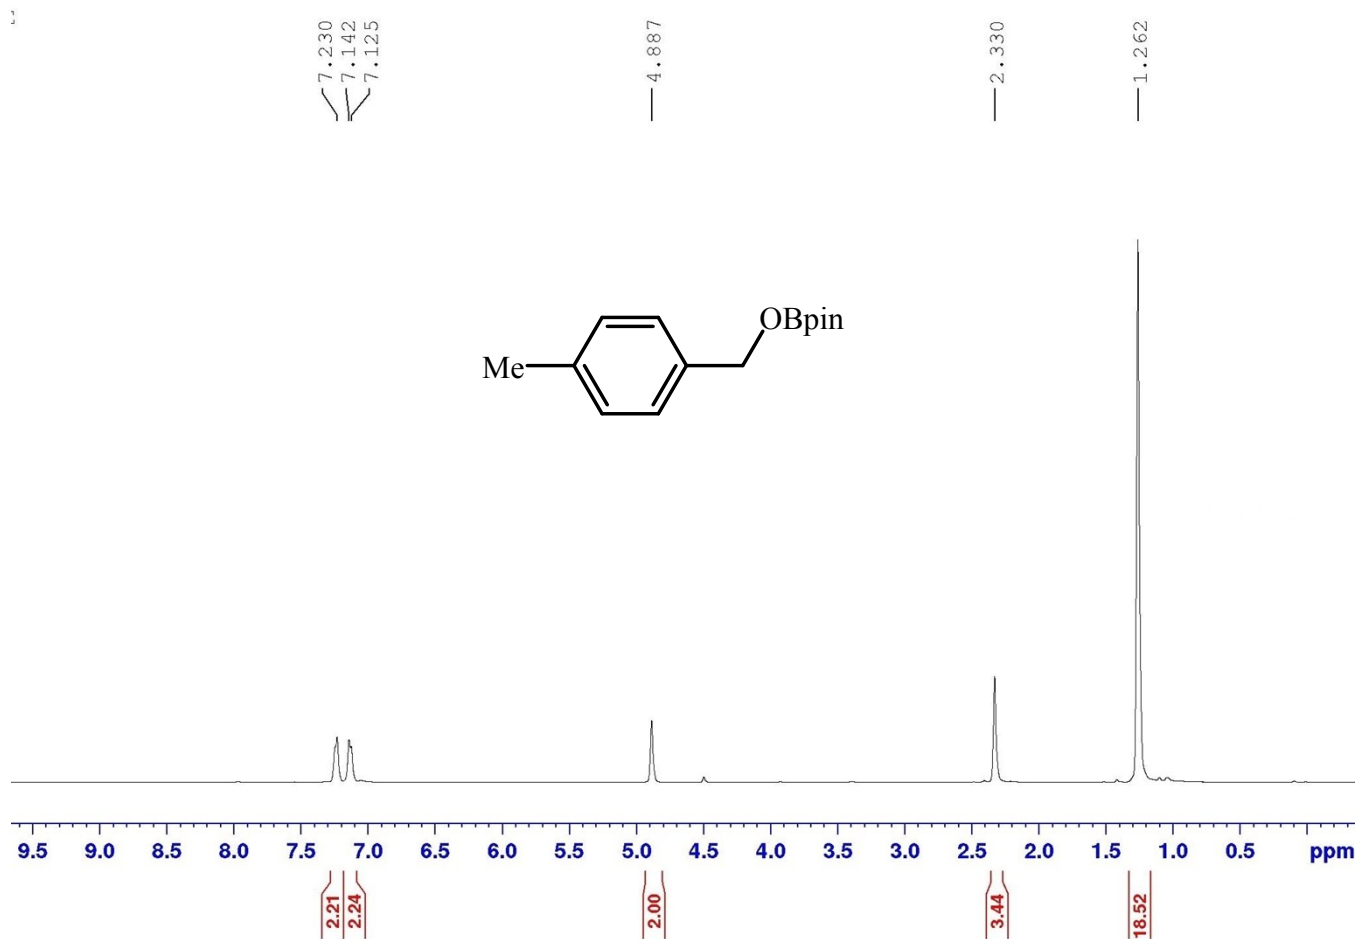

$^{13}\text{C}$  NMR spectrum of the hydroborylated product of 4-methylbenzaldehyde

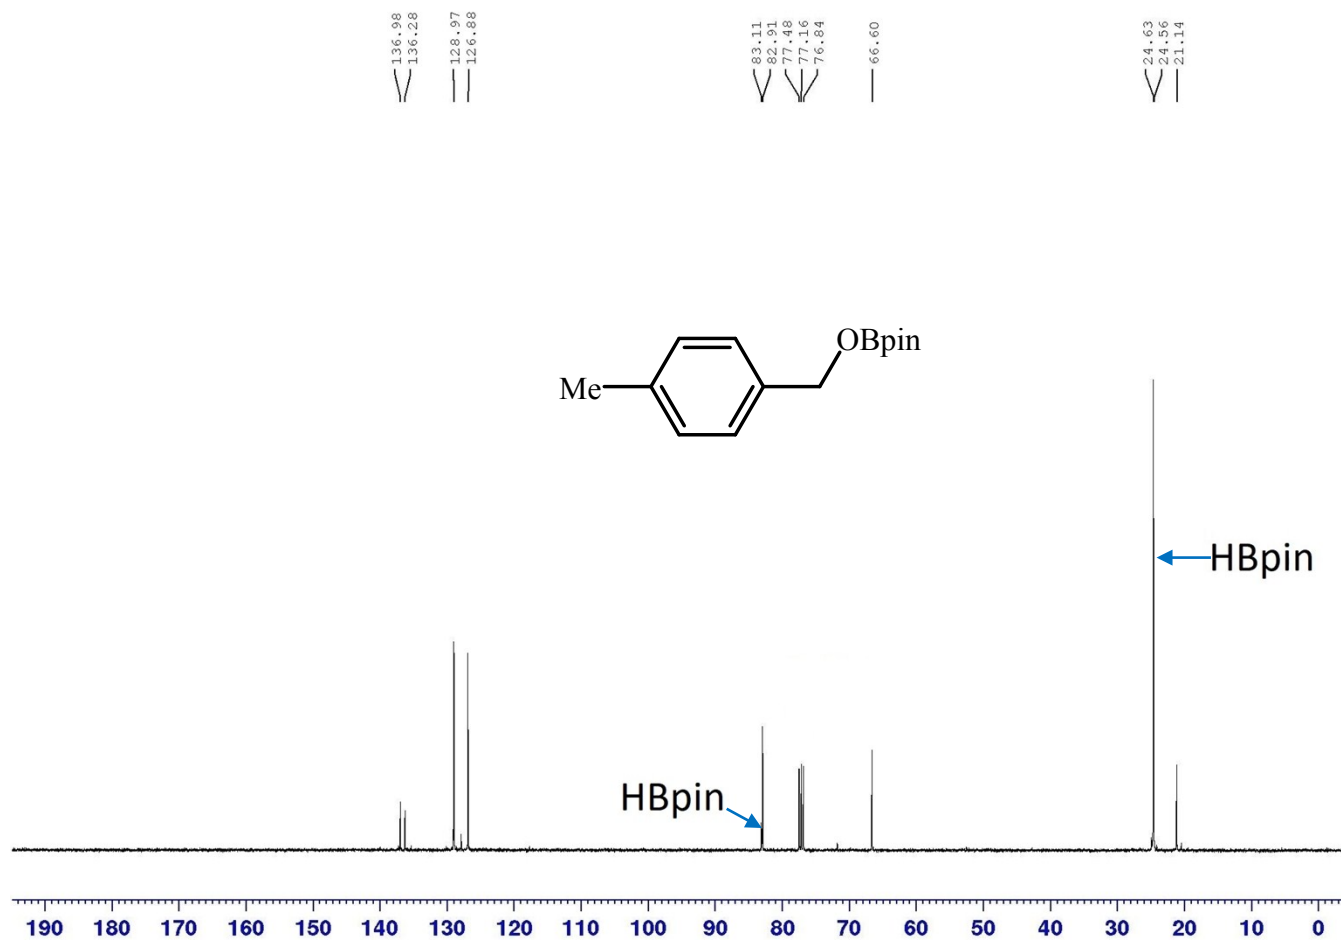

$^1\text{H}$  NMR spectrum of the hydroborylated product of 4-methoxybenzaldehyde

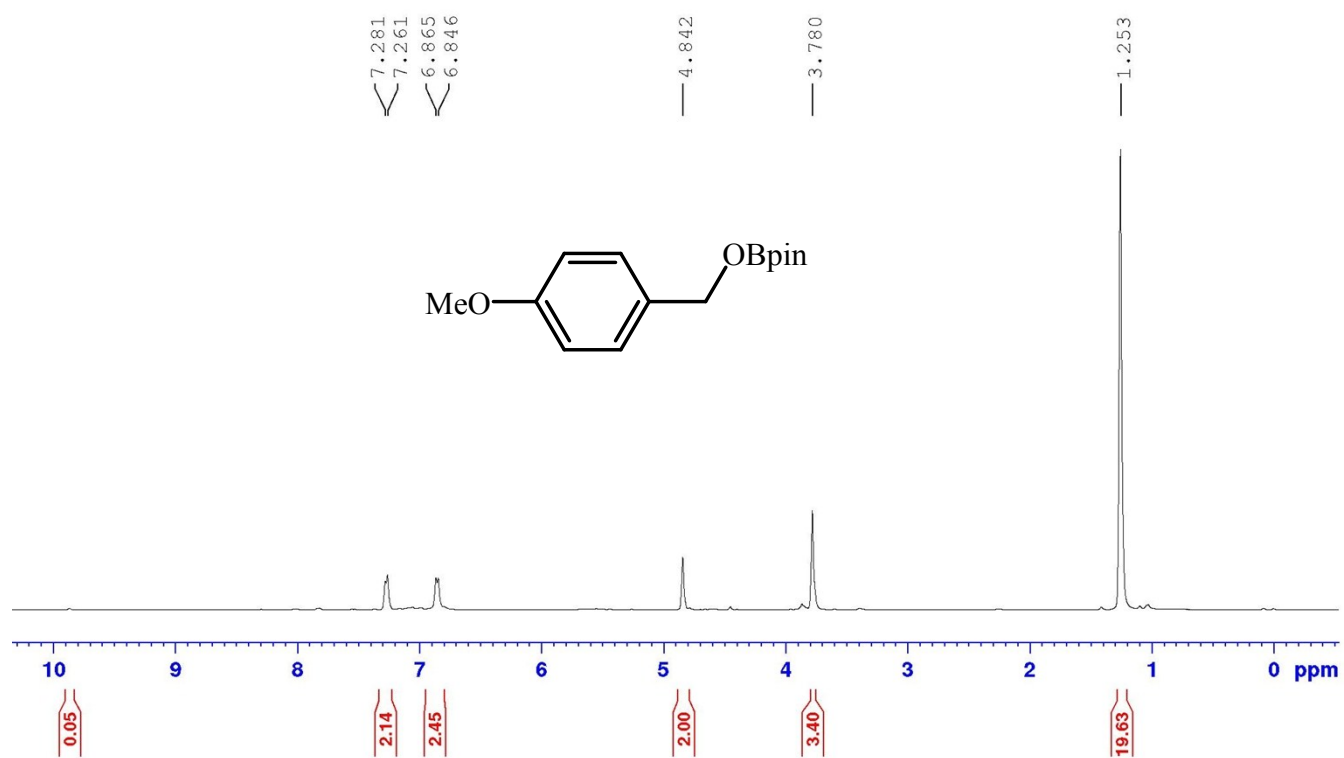

$^{13}\text{C}$  NMR spectrum of the hydroborylated product of 4-methoxybenzaldehyde

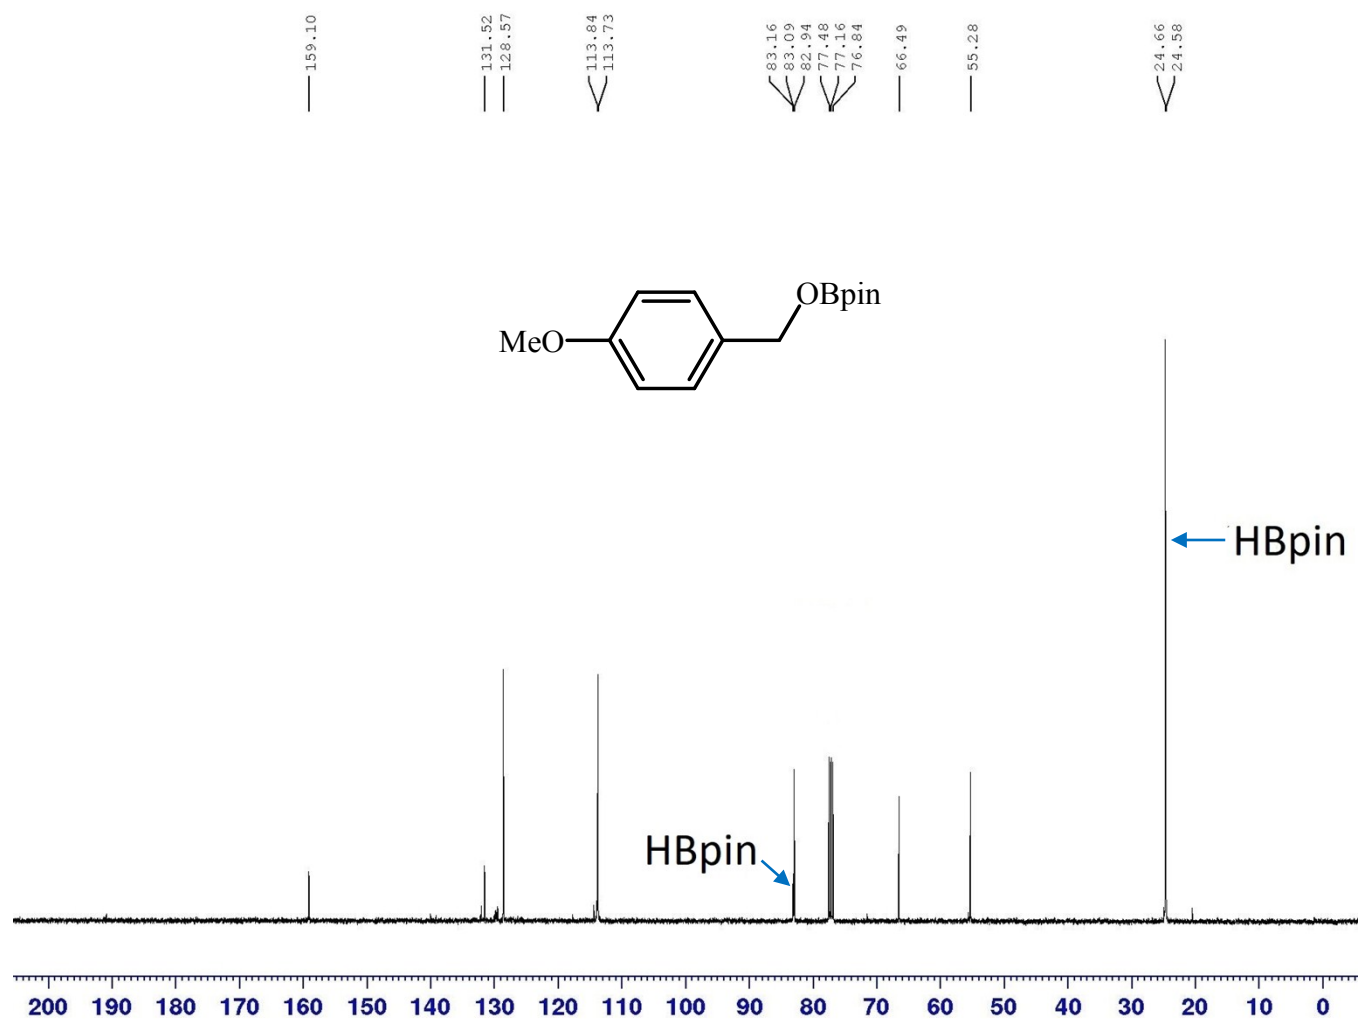

Chemical structure: Cc1cc(C)c(C)cc1COP(=O)(OC(C)(C)C)OC(C)(C)C

<sup>1</sup>H NMR spectrum (CDCl<sub>3</sub>) data:

| Chemical Shift (ppm) | Integration |
|----------------------|-------------|
| 6.791                | 2.08        |
| 4.922                | 2.00        |
| 2.346                | 5.94        |
| 2.211                | 3.60        |
| 2.015                | 18.07       |
| 1.219                | 18.07       |



$^{13}\text{C}$  NMR spectrum of the hydroborylated product of Mesitaldehyde

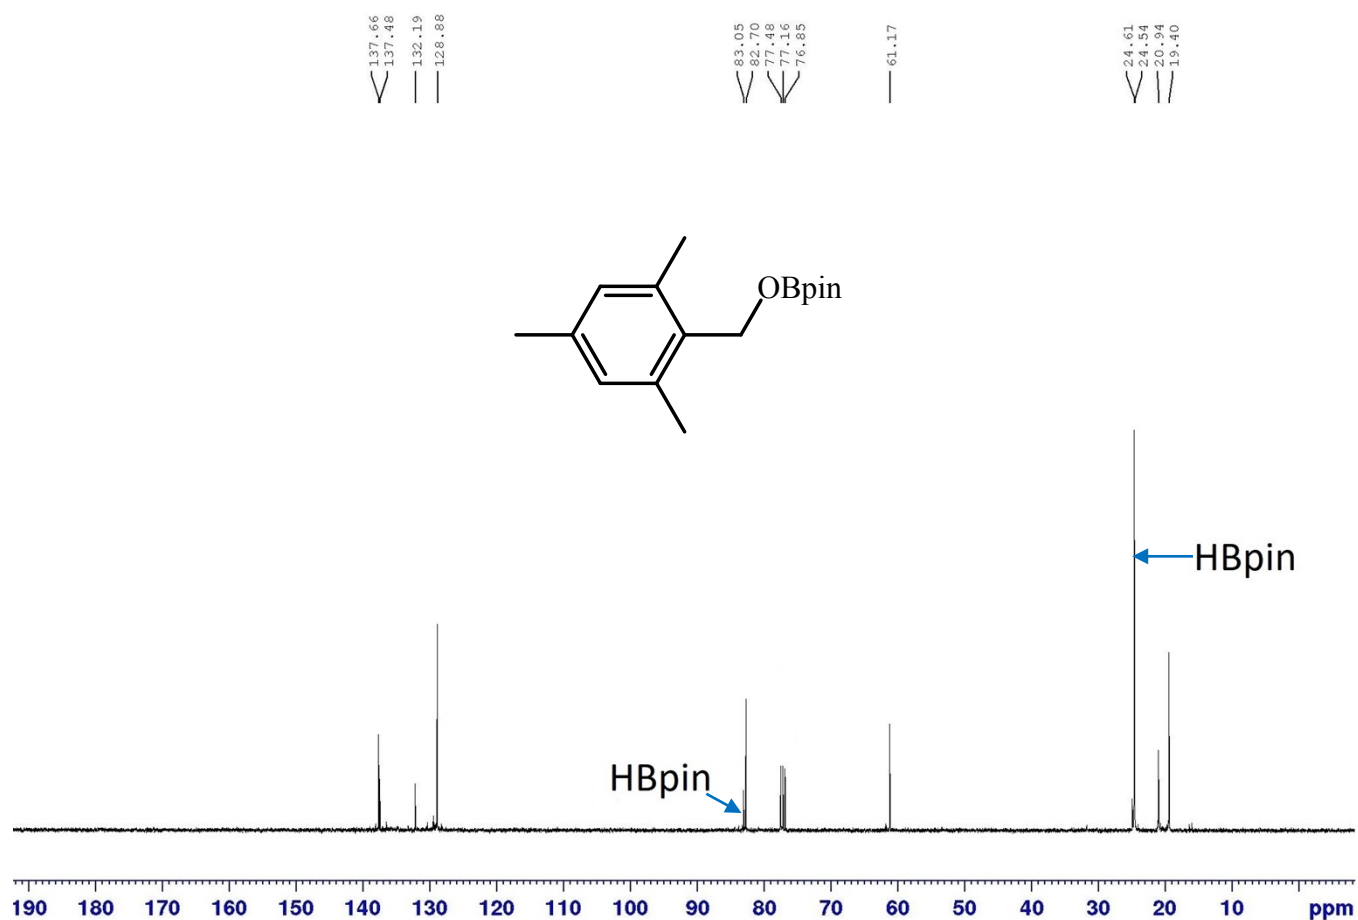

$^1\text{H}$  NMR spectrum of the hydroborylated product of acetone

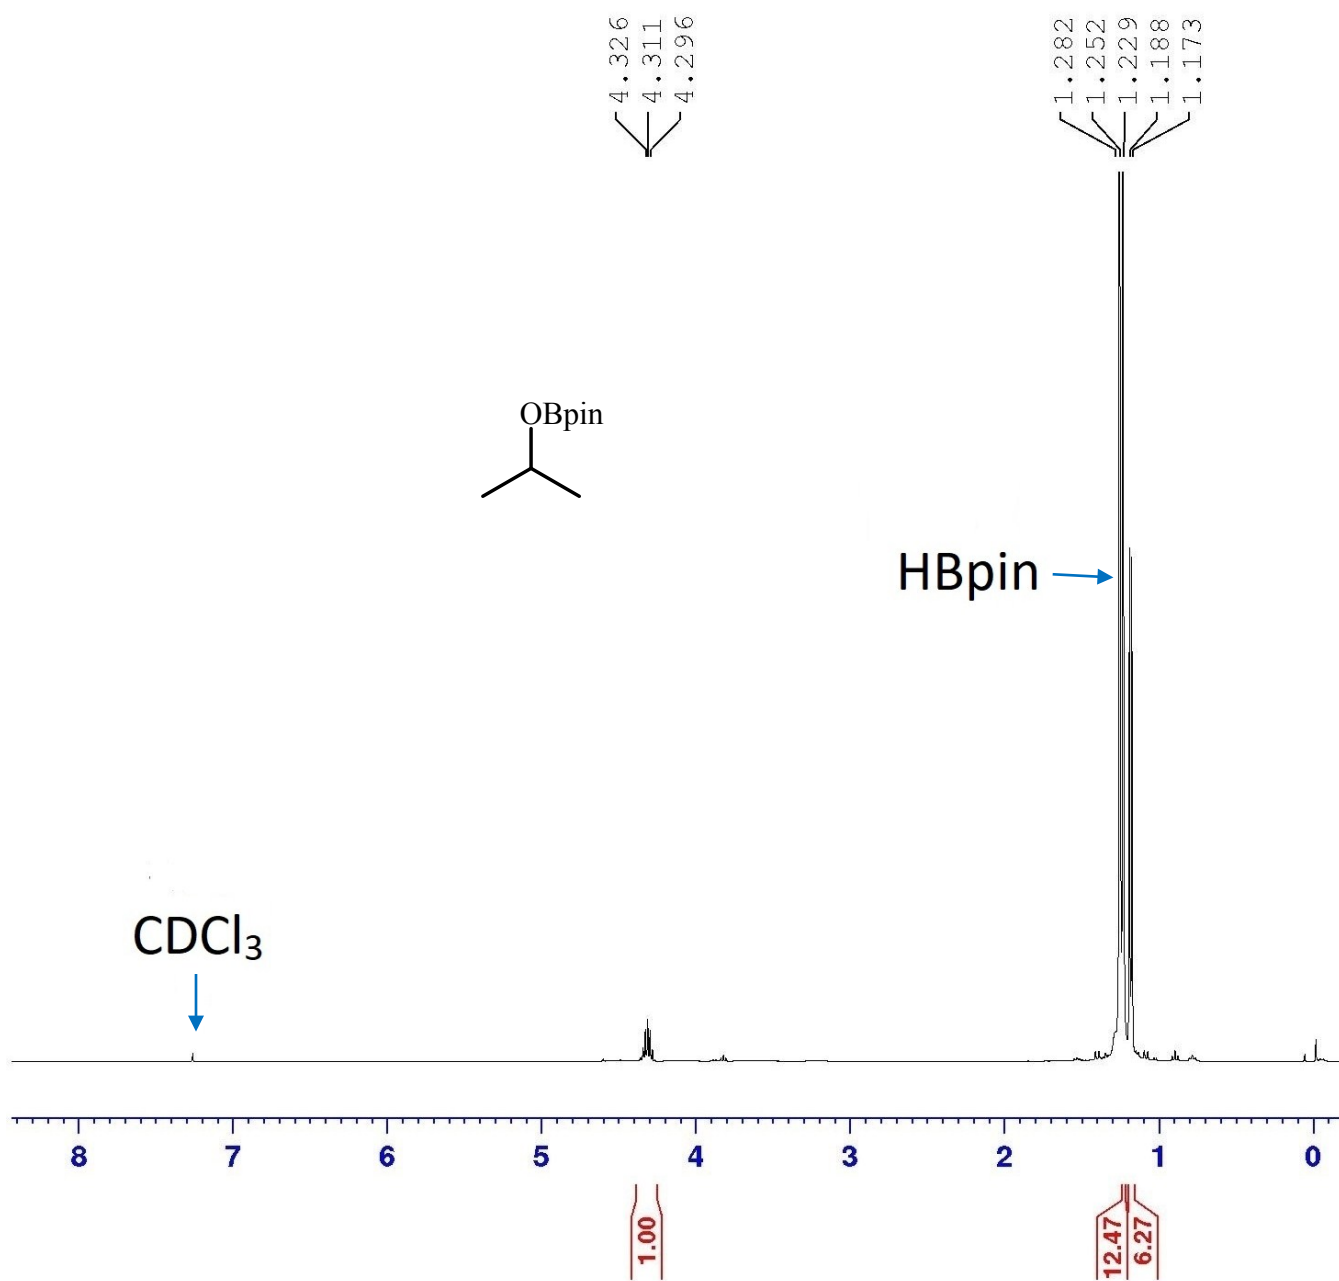

$^{13}\text{C}$  NMR spectrum of the hydroborylated product of acetone

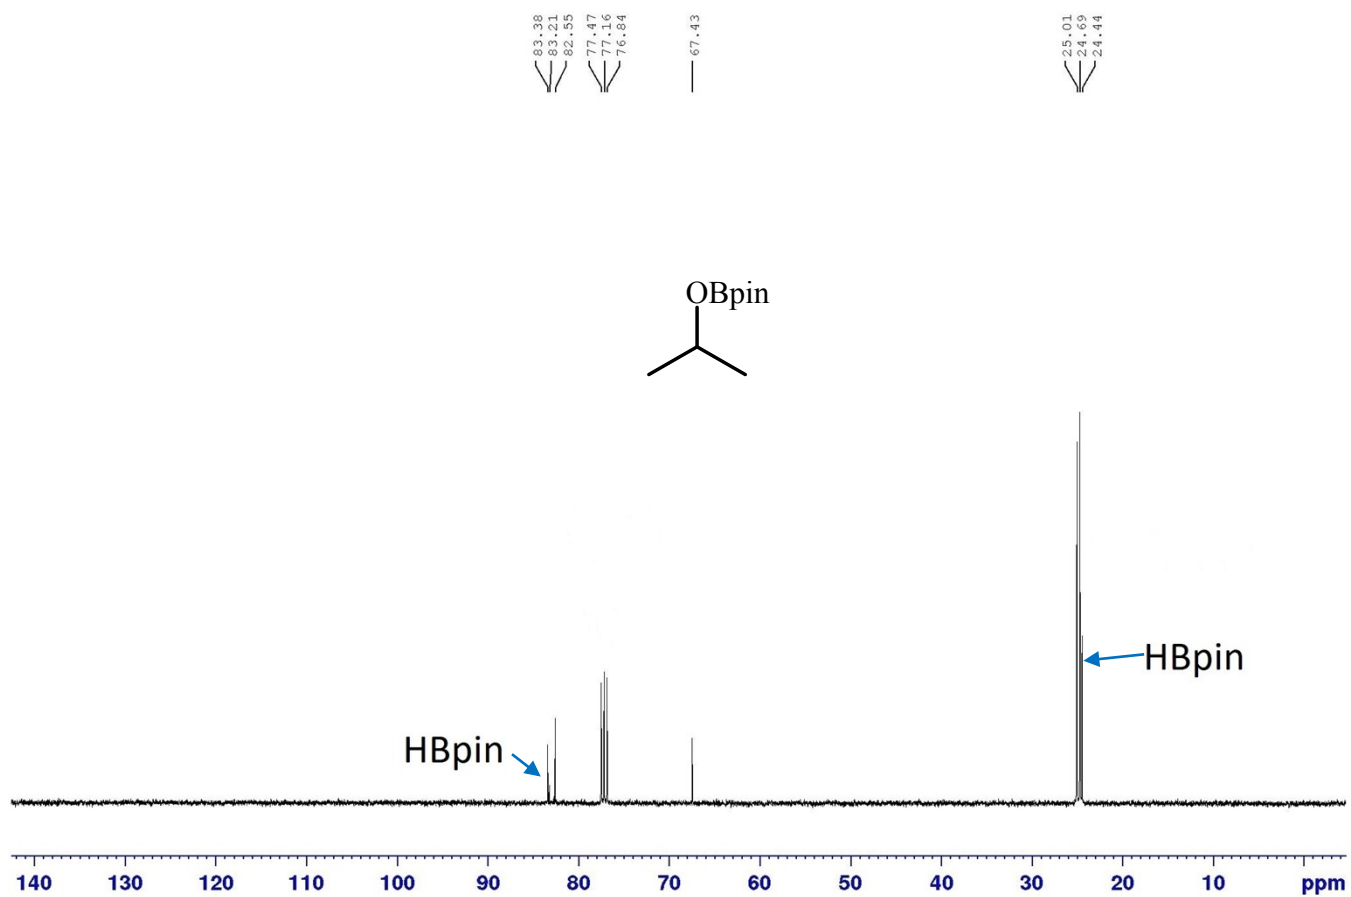

$^1\text{H}$  NMR spectrum of the hydroborylated product of 2-pentanone

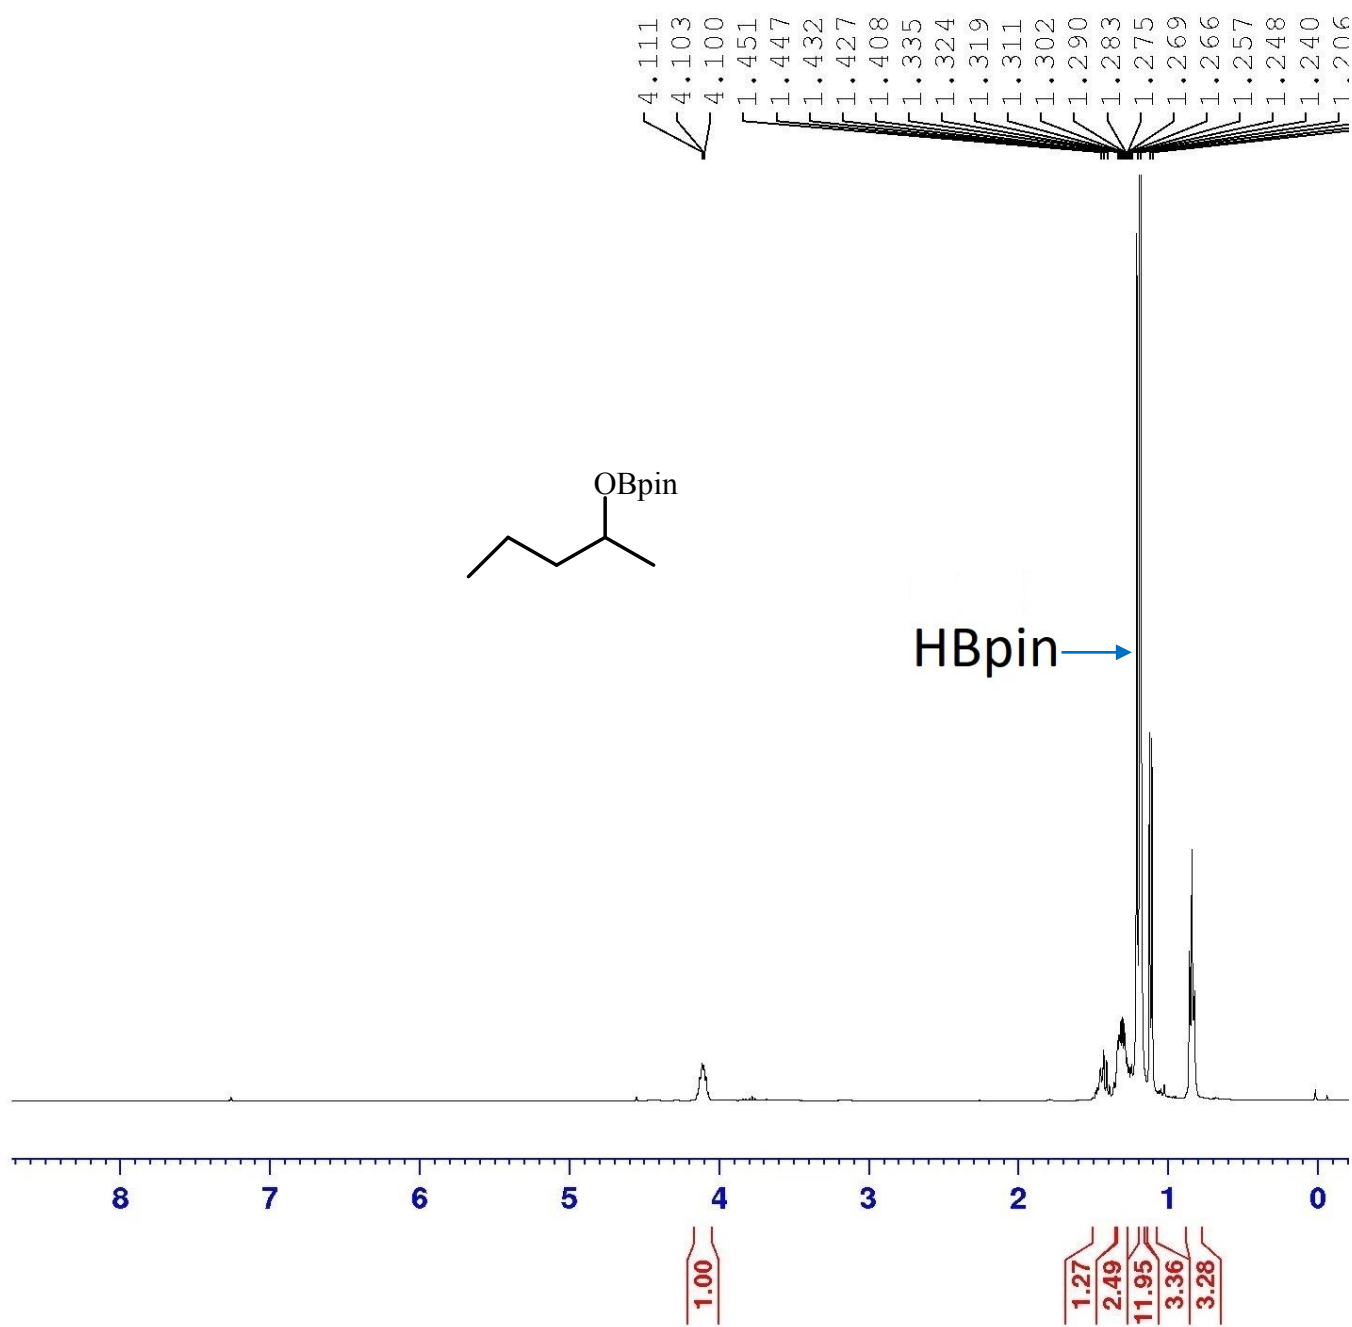

$^{13}\text{C}$  NMR spectrum of the hydroborylated product of 2-pentanone

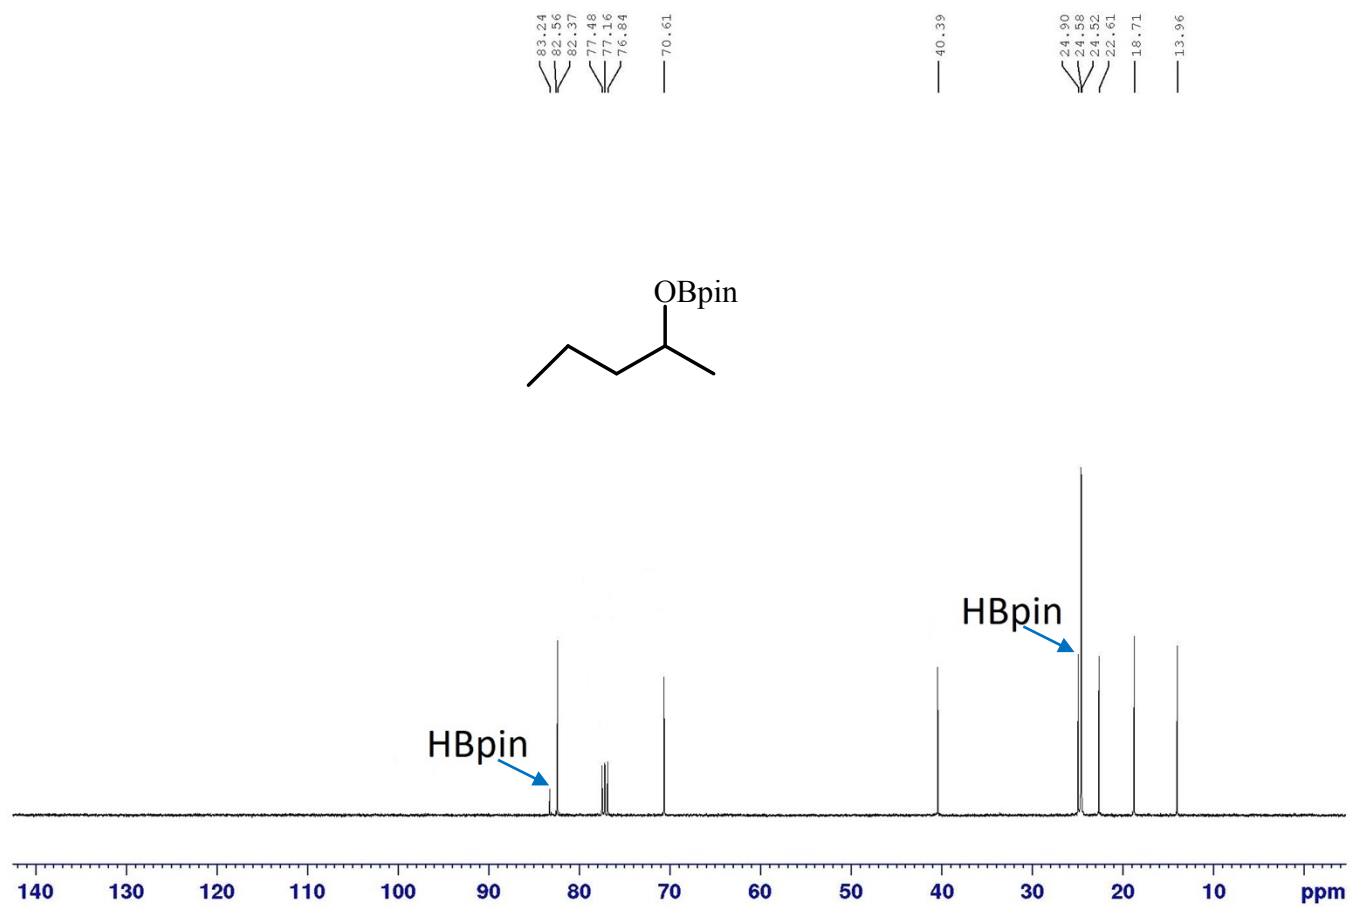

CC(O)c1ccccc1

7.335, 7.304, 7.286, 7.271, 7.268, 7.222, 7.218, 7.204, 5.236, 5.221, 1.481, 1.465, 1.242, 1.217, 1.187

3.80, 1.26, 1.00, 3.25, 12.23

HBpin →

$^{13}\text{C}$  NMR spectrum of the hydroborylated product of acetophenone

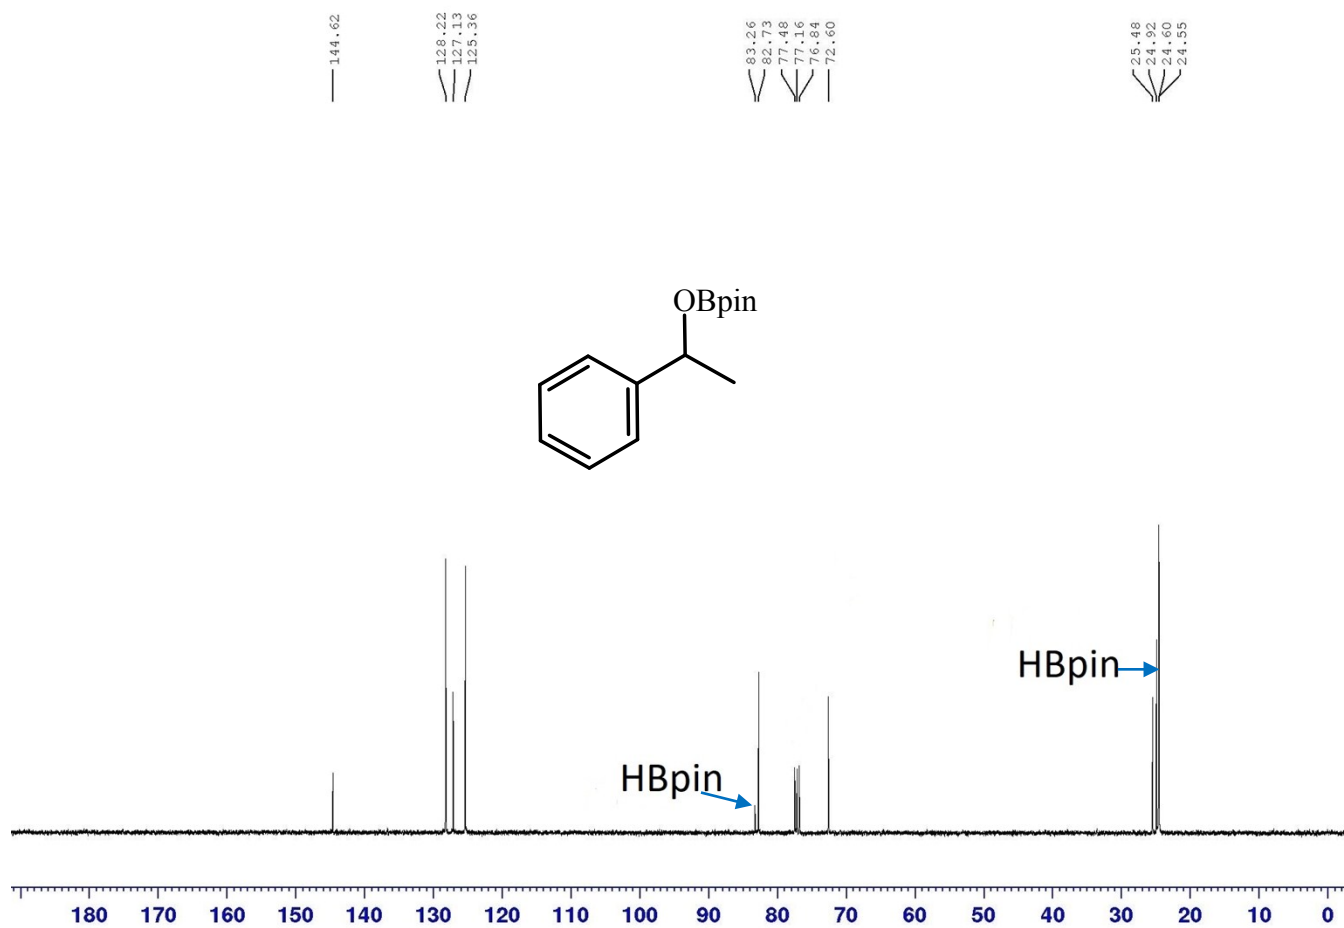

$^1\text{H}$  NMR spectrum of the hydroborylated product of 4-fluoroacetophenone

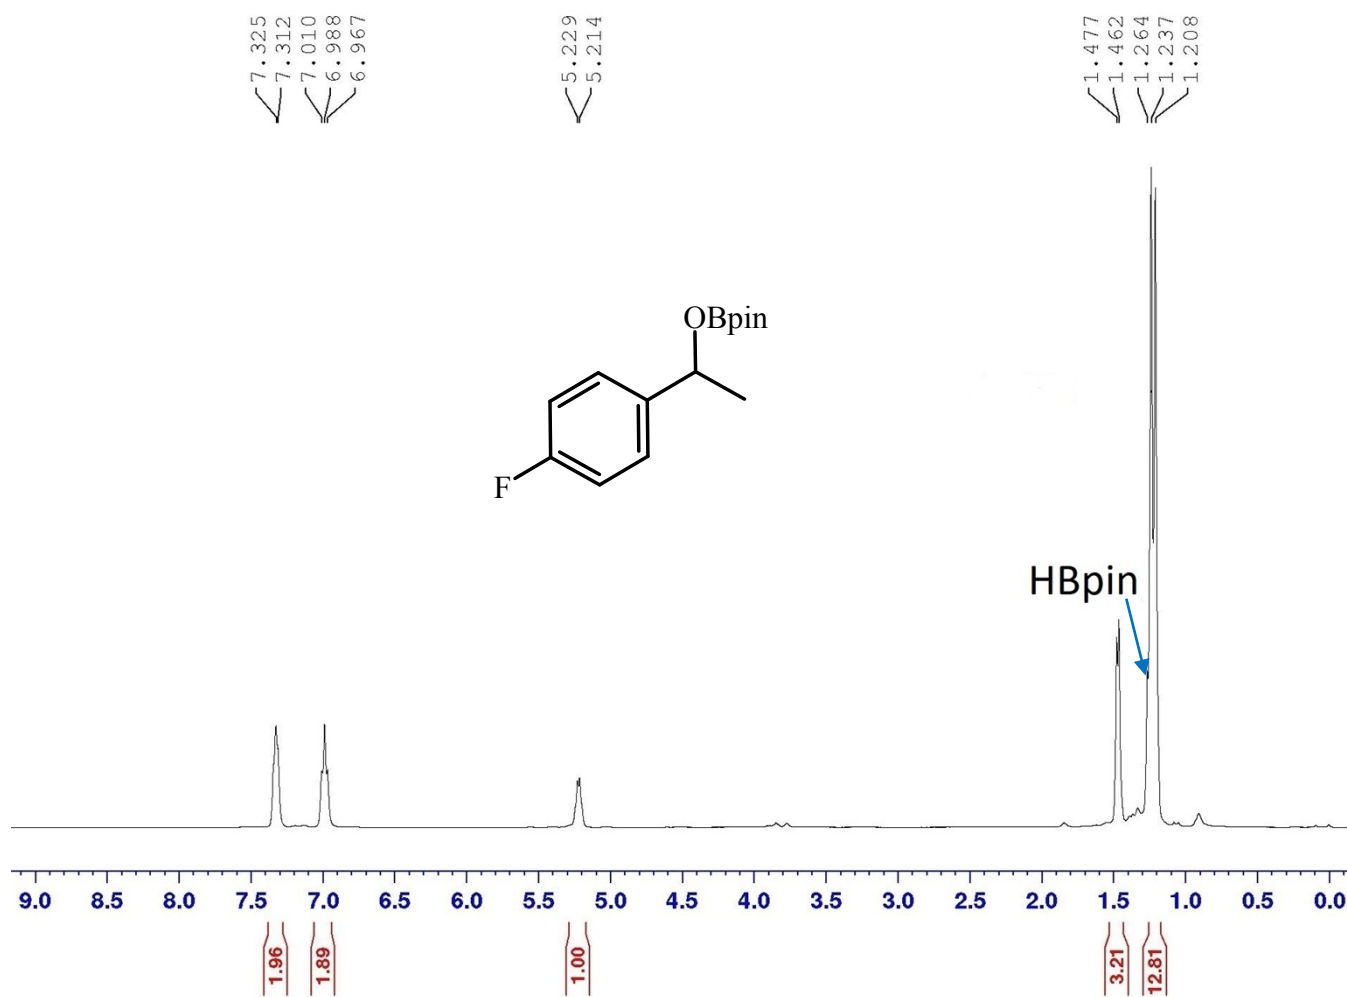



$^{13}\text{C}$  NMR spectrum of the hydroborylated product of 4-fluoroacetophenone

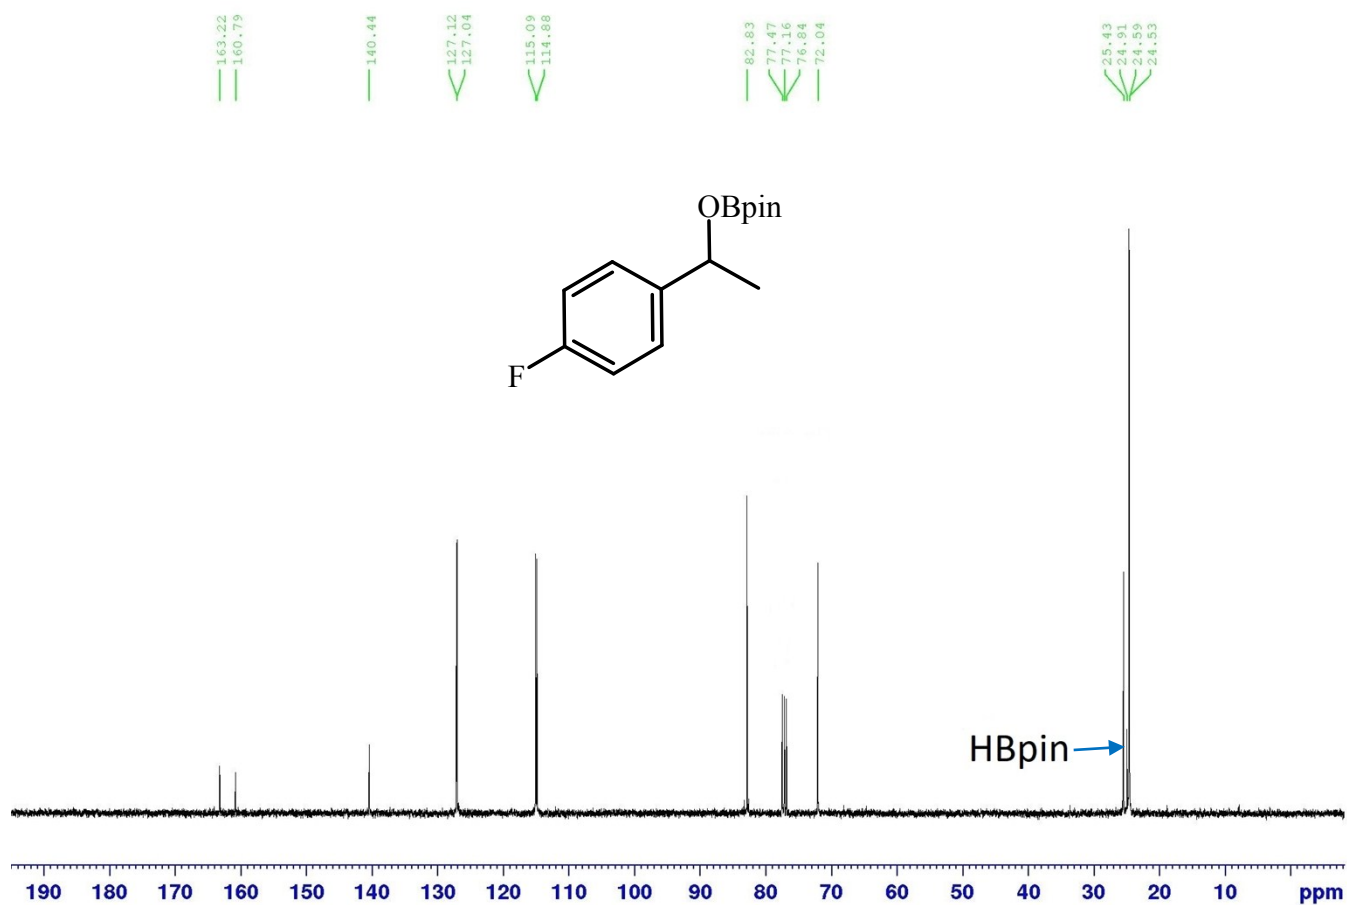

$^1\text{H}$  NMR spectrum of the hydroborylated product of 4-chloroacetophenone

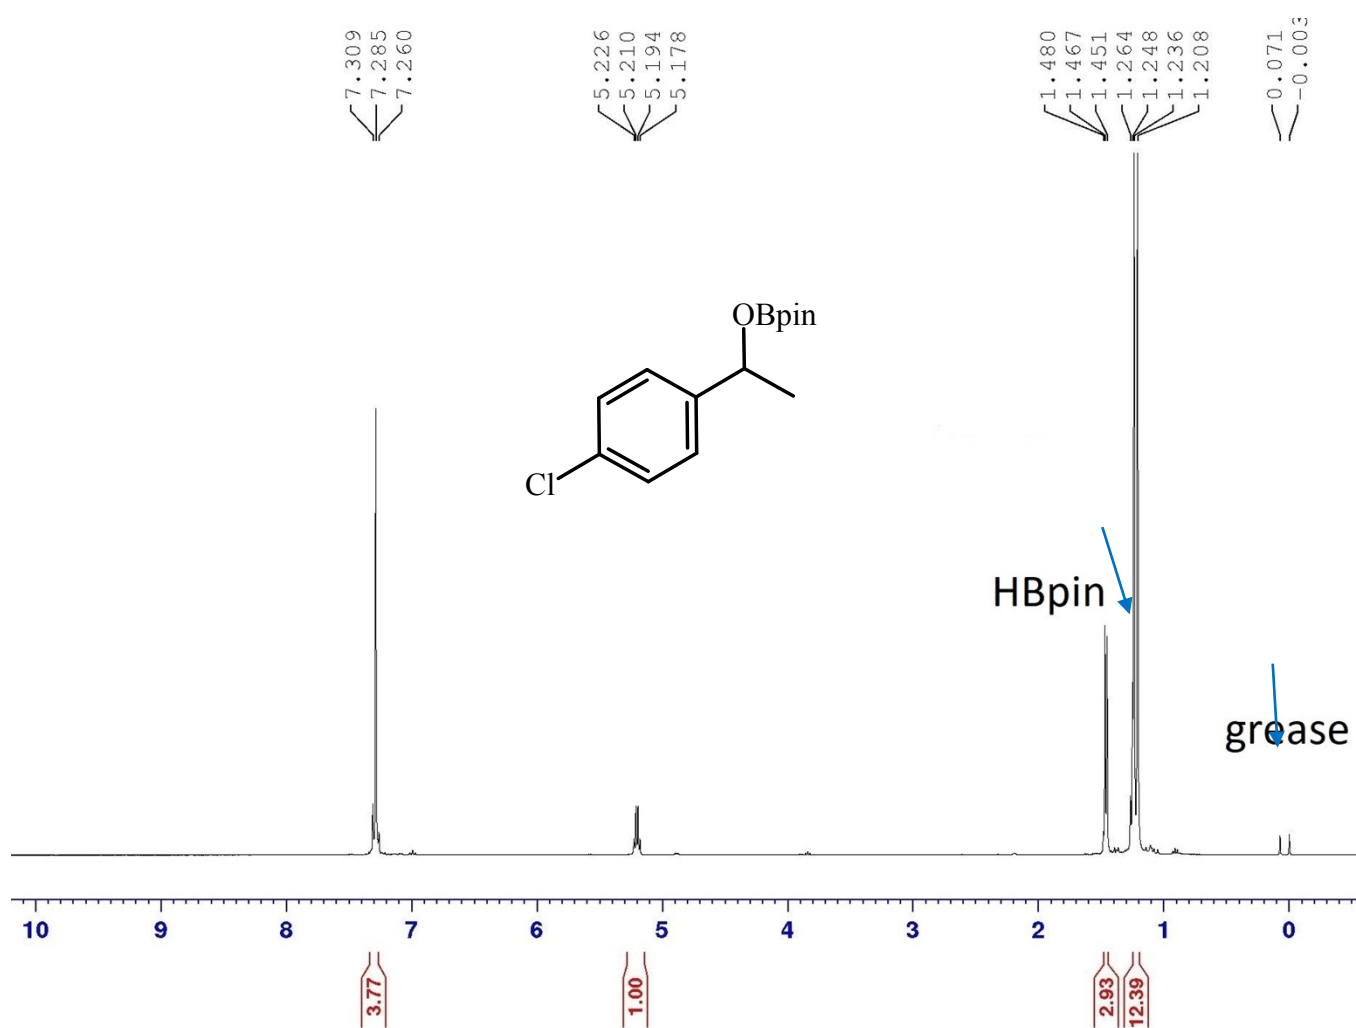

$^{13}\text{C}$  NMR spectrum of the hydroborylated product of 4-chloroacetophenone

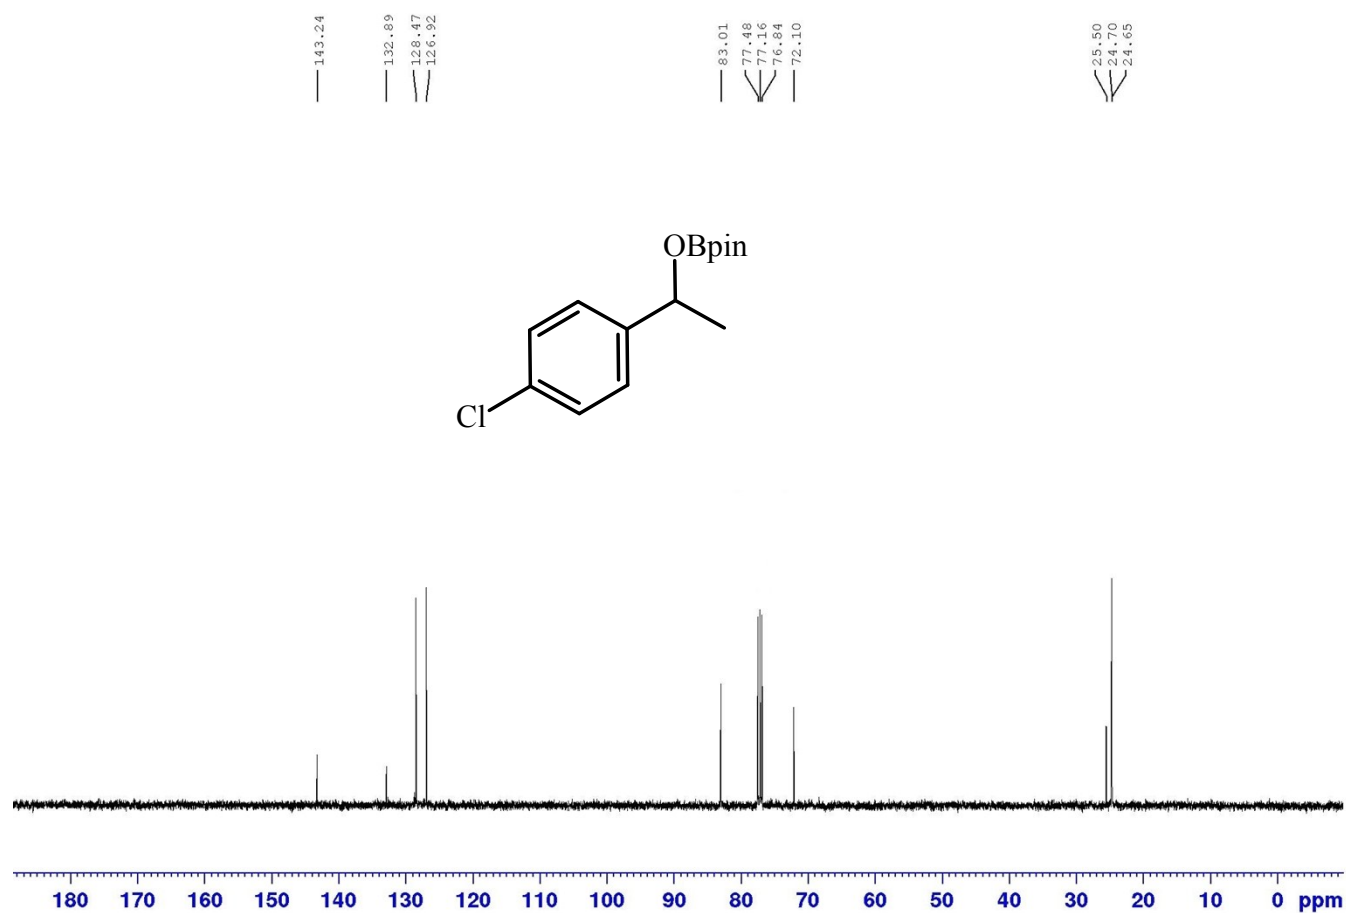

$^1\text{H}$  NMR spectrum of the hydroborylated product of 4-methylacetophenone

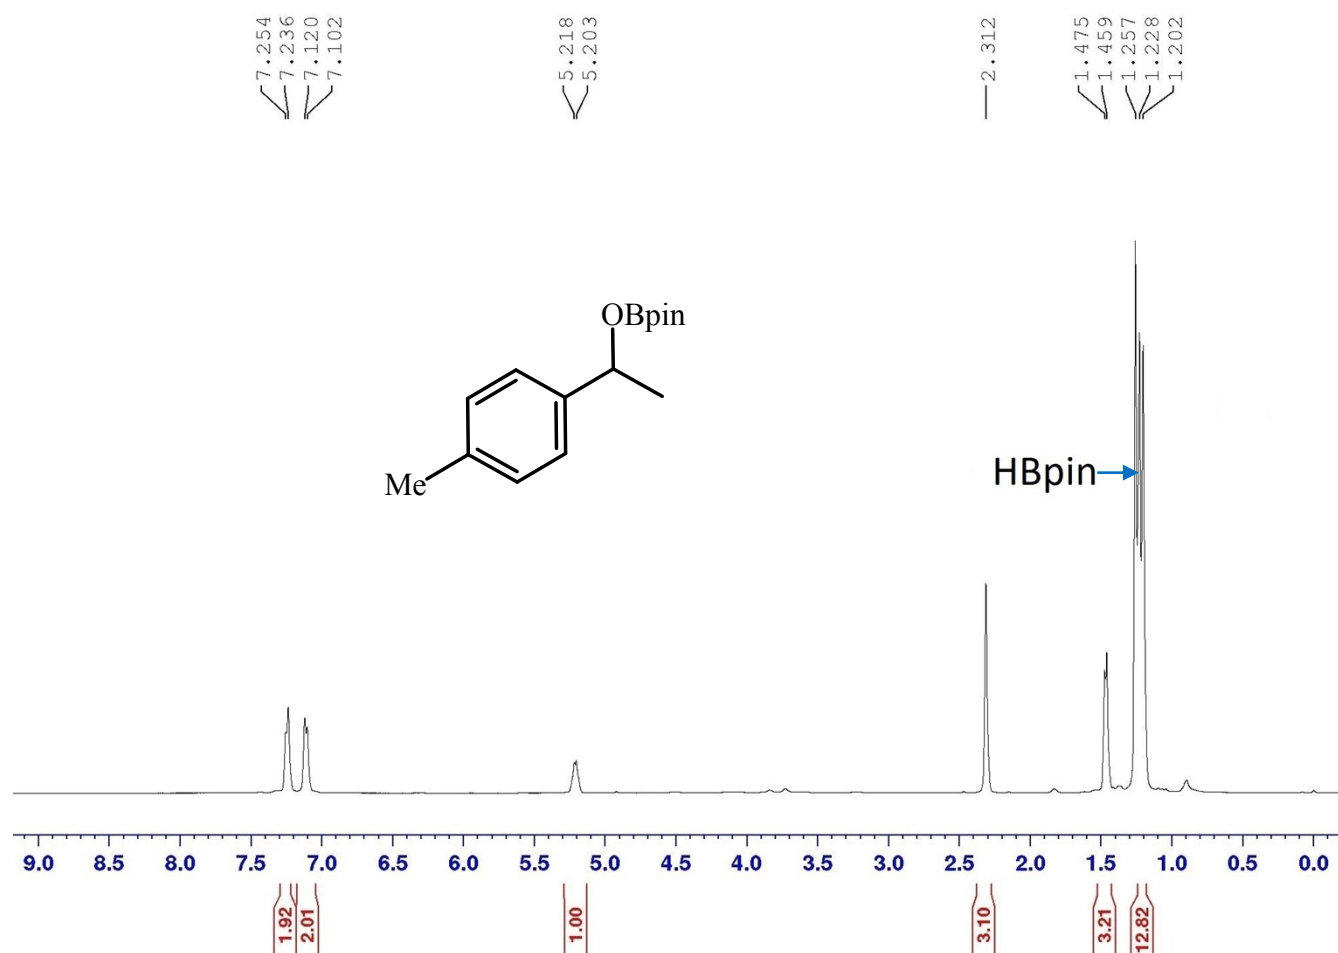

$^{13}\text{C}$  NMR spectrum of the hydroborylated product of 4-methylacetophenone

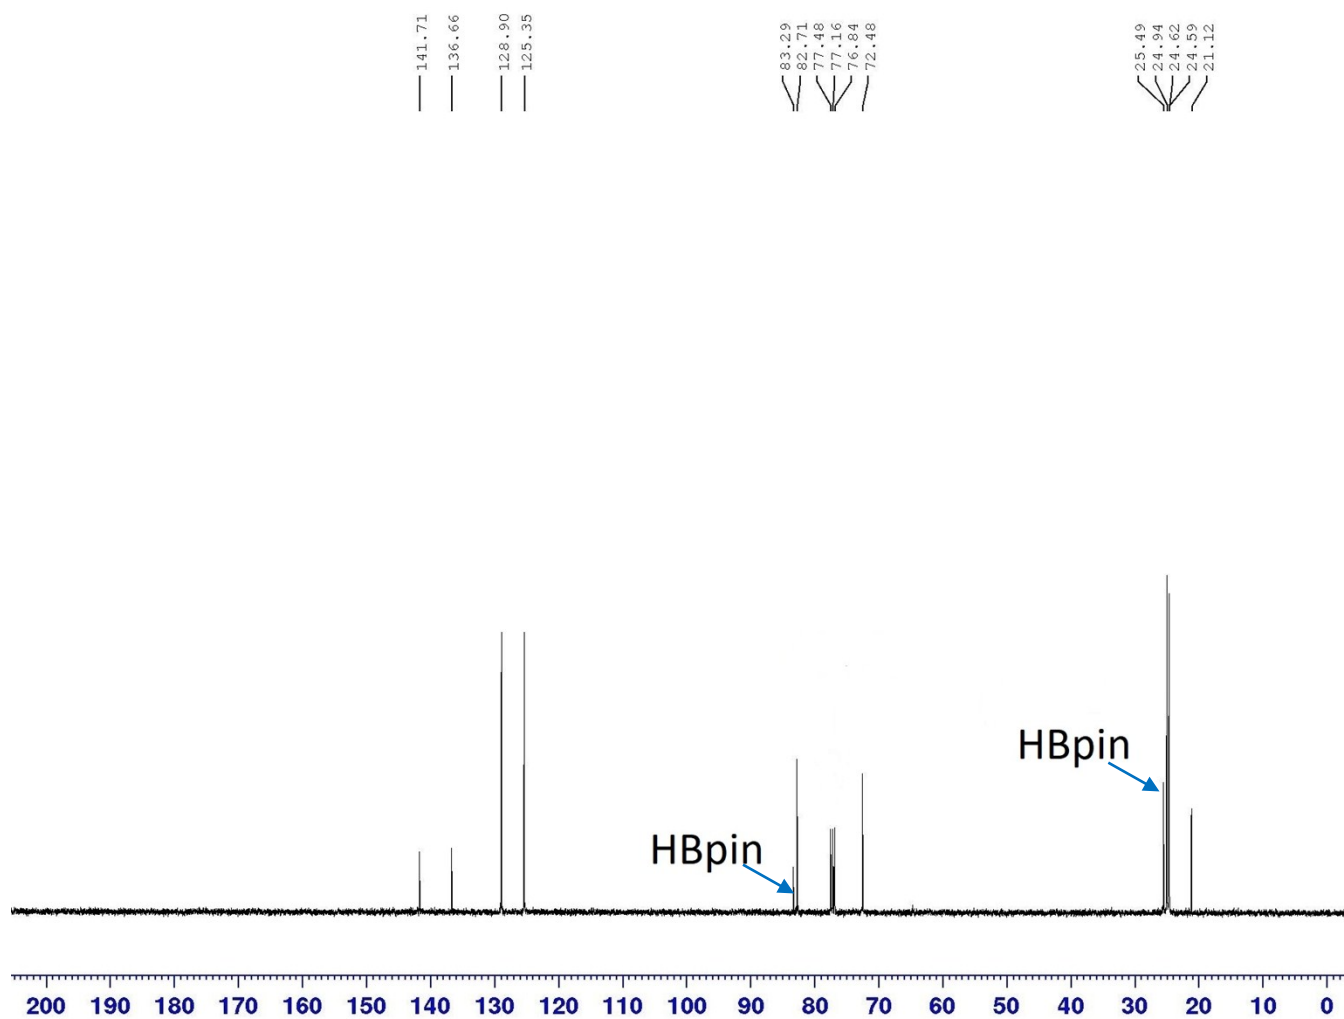

$^1\text{H}$  NMR spectrum of the hydroborylated product of benzophenone

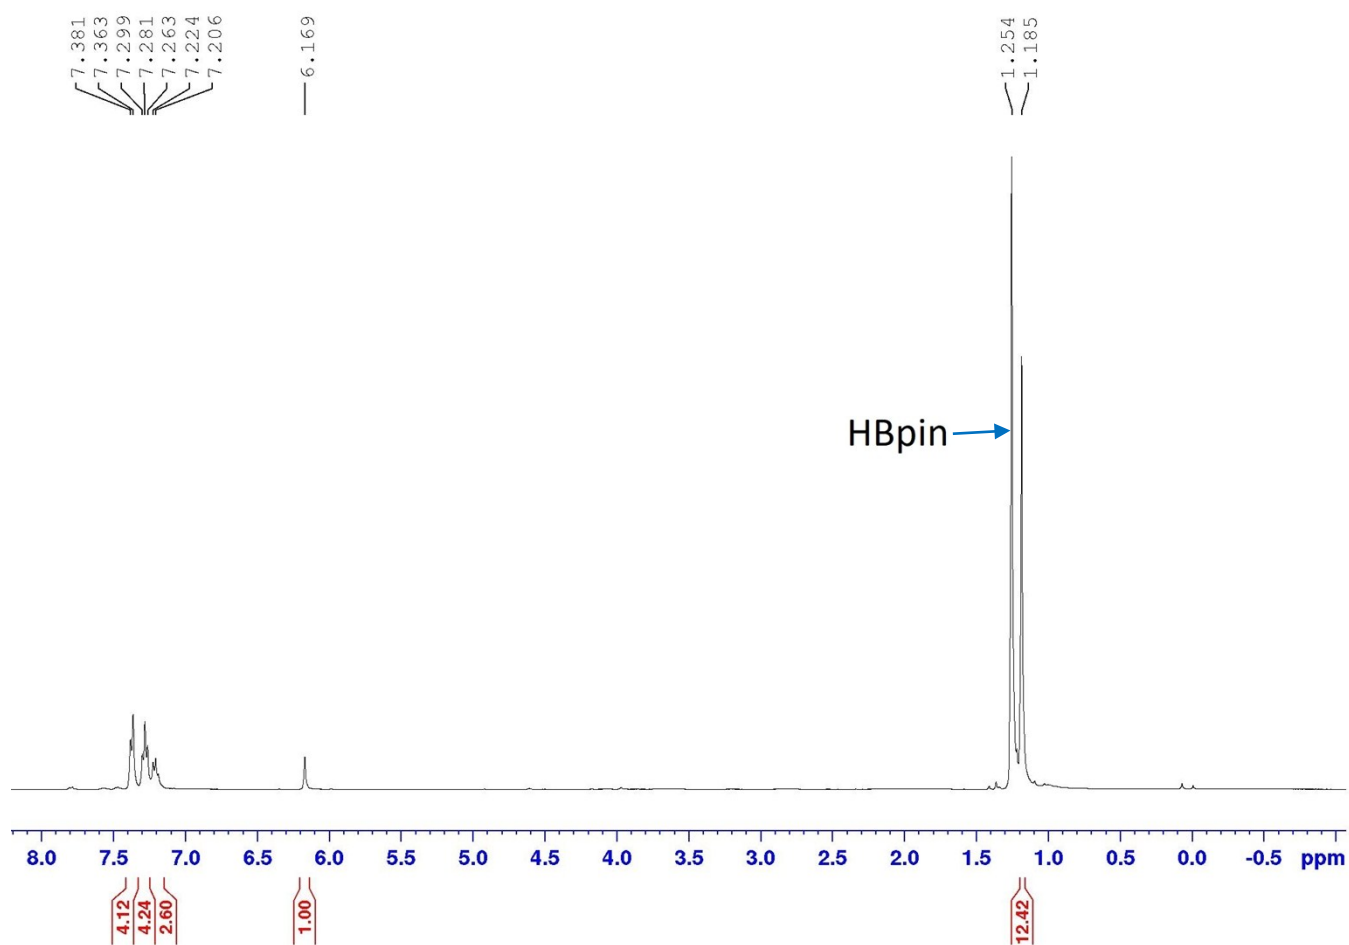

$^{13}\text{C}$  NMR spectrum of the hydroborylated product of benzophenone

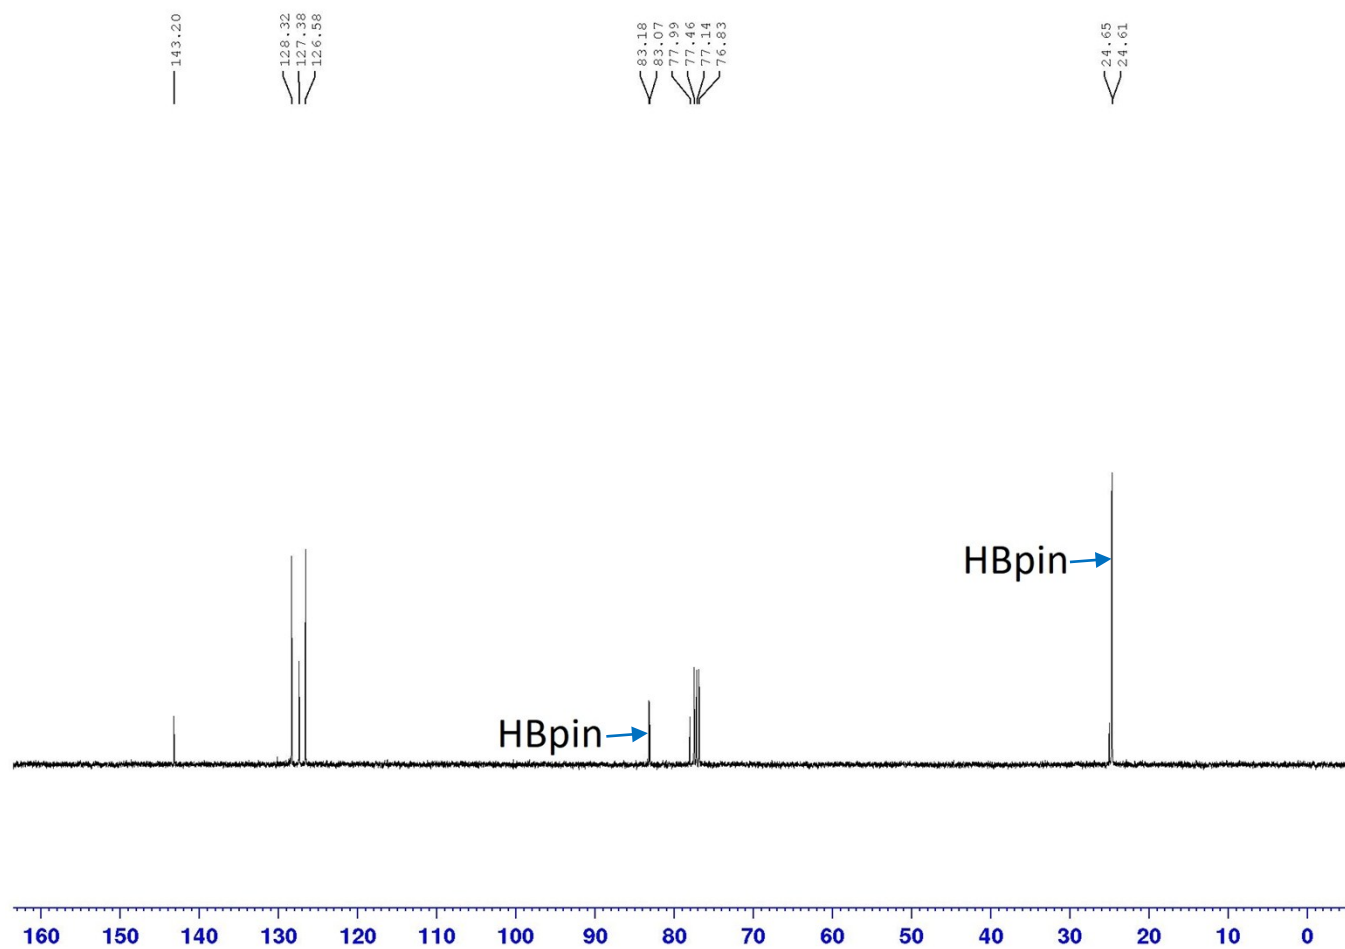

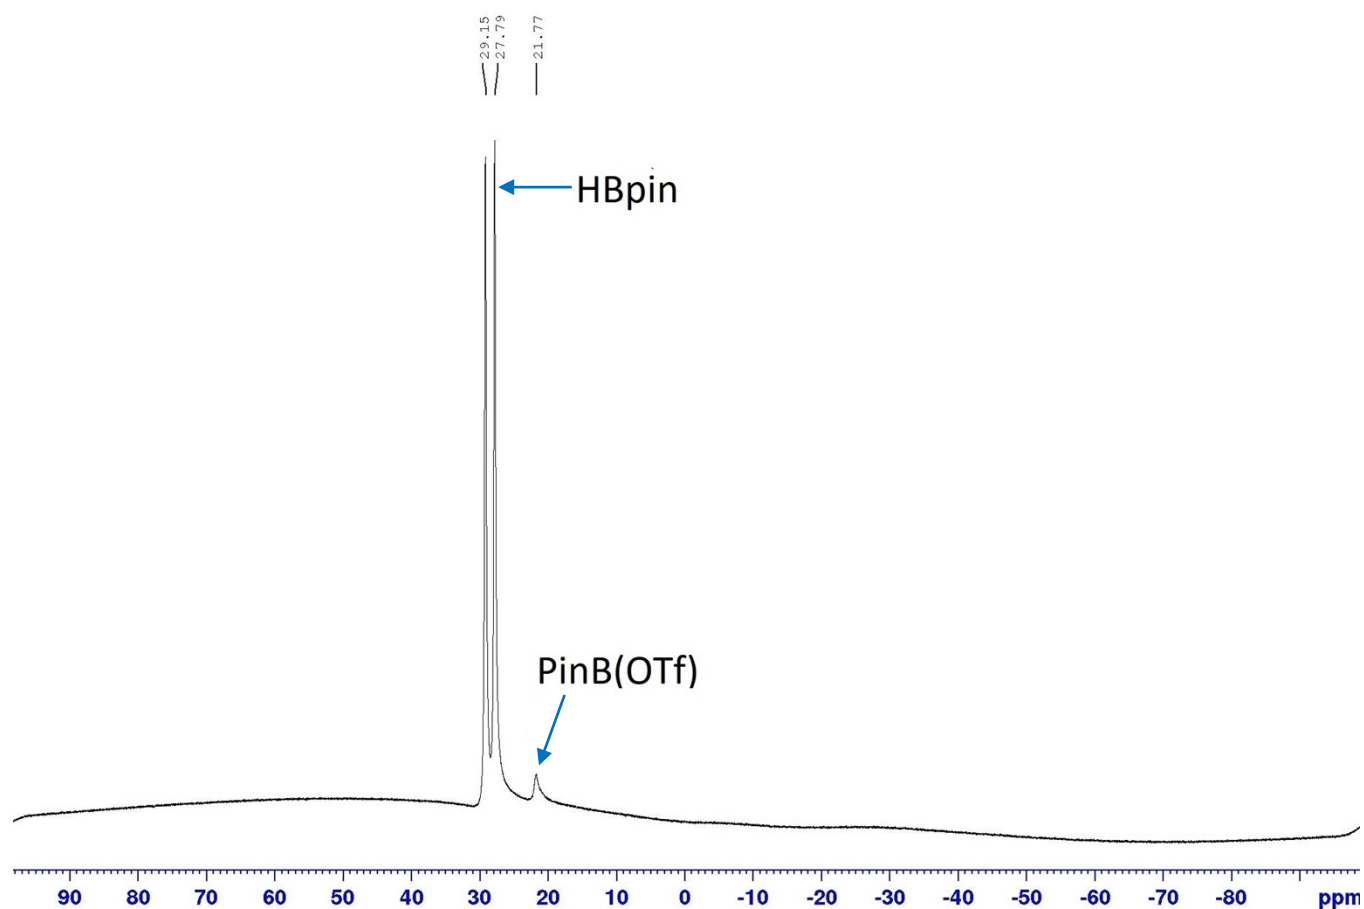

**Figure S4:**  $^{11}\text{B}$  NMR spectrum for the reaction mixture containing compound 4 and HBpin (in a 1:1 molar ratio) in  $\text{C}_6\text{D}_6$  (0.4 mL)



## References

- S1. R. K. Siwatch, S. Kundu, D. Kumar and S. Nagendran, *Oragnometallics*, 2011, **30**, 1998-2005.
- S2. S. Sinhababu, R. K. Siwatch, G. Mukherjee, G. Rajaraman and S. Nagendran, *Inorg. Chem.*, 2012, **51**, 9240-9248.
- S3. SAINT-NT, Version 6.04; Bruker AXS: Madison, WI, 2001.
- S4. SHELXTL-NT, Version 6.10; Bruker AXS: Madison, WI, 2000.
- S5. M. J. Frisch, G. W. Trucks, H. B. Schlegel, G. E. Scuseria, M. A. Robb, J. R. Cheeseman, G. Scalmani, V. Barone, B. Mennucci, G. A. Petersson, H. Nakatsuji, M. Caricato, X. Li, H. P. Hratchian, A. F. Izmaylov, J. Bloino, G. Zheng, J. L. Sonnenberg, M. Hada, M. Ehara, K. Toyota, R. Fukuda, J. Hasegawa, M. Ishida, T. Nakajima, Y. Honda, O. Kitao, H. Nakai, T. Vreven, J. A. Montgomery, Jr., J. E. Peralta, F. Ogliaro, M. Bearpark, J. J. Heyd, E. Brothers, K. N. Kudin, V. N. Staroverov, R. Kobayashi, J. Normand, K. Raghavachari, A. Rendell, J. C. Burant, S. S. Iyengar, J. Tomasi, M. Cossi, N. Rega, J. M. Millam, M. Klene, J. E. Knox, J. B. Cross, V. Bakken, C. Adamo, J. Jaramillo, R. Gomperts, R. E. Stratmann, O. Yazyev, A. J. Austin, R. Cammi, C. Pomelli, J. W. Ochterski, R. L. Martin, K. Morokuma, V. G. Zakrzewski, G. A. Voth, P. Salvador, J. J. Dannenberg, S. Dapprich, A. D. Daniels, Ö. Farkas, J. B. Foresman, J. V. Ortiz, J. Cioslowski, and D. J. Fox, Gaussian 09, Revision C.01; Gaussian, Inc.: Wallingford, CT, **2010**.
- S6. F. Weinhold, C. Landis, *Valency and Bonding*; Cambridge: Cambridge, **2005**.
- S7. (a) A. E. Reed, L. A. Curtiss, F. Weinhold, *Chem. Rev.*, 1988, **88**, 899. (b) E. D. Glendening, A. E. Reed, J. E. Carpenter, Weinhold, F. NBO Version 3.1.
